# Supplementary material for: Myelination and excitation-inhibition balance synergistically shape structure-function coupling across the human cortex
Source: PubMed Central journal article supplement (PMC10542365; doi:10.1038/s41467-023-41686-9), 2023-09-30
Supplement: 41467_2023_41686_MOESM1_ESM.pdf [file 41467_2023_41686_MOESM1_ESM.pdf]

# **Myelination and excitation-inhibition balance synergistically shape structure-function coupling across the human cortex**

Panagiotis Fotiadis,<sup>1,2,†</sup> Matthew Cieslak,<sup>3</sup> Xiaosong He,<sup>4</sup> Lorenzo Caciagli,<sup>2</sup> Mathieu Ouellet,<sup>2</sup> Theodore D. Satterthwaite,<sup>3</sup> Russell T. Shinohara,<sup>5,6</sup> Dani S. Bassett<sup>2,3,7-10,†</sup>

<sup>1</sup> Department of Neuroscience, Perelman School of Medicine, University of Pennsylvania, Philadelphia, PA 19104, USA

<sup>2</sup> Department of Bioengineering, University of Pennsylvania, Philadelphia, PA 19104, USA

<sup>3</sup> Department of Psychiatry, Perelman School of Medicine, University of Pennsylvania, Philadelphia, PA 19104, USA

<sup>4</sup> Department of Psychology, University of Science and Technology of China, Hefei, Anhui, 230026, China

<sup>5</sup> Penn Statistics in Imaging and Visualization Center, Department of Biostatistics, Epidemiology, and Informatics, University of Pennsylvania, Philadelphia, PA 19104, USA

<sup>6</sup> Center for Biomedical Image Computing & Analytics, University of Pennsylvania, Philadelphia, PA 19104, USA

<sup>7</sup> Department of Electrical & Systems Engineering, University of Pennsylvania, Philadelphia, PA 19104, USA

<sup>8</sup> Department of Physics & Astronomy, University of Pennsylvania, Philadelphia, PA 19104, USA

<sup>9</sup> Department of Neurology, Perelman School of Medicine, University of Pennsylvania, Philadelphia, PA 19104, USA

<sup>10</sup> Santa Fe Institute, Santa Fe, NM 87501, USA

† Corresponding authors:

Panagiotis Fotiadis ([panosf@pennmedicine.upenn.edu](mailto:panosf@pennmedicine.upenn.edu)), Dani S. Bassett ([dsb@seas.upenn.edu](mailto:dsb@seas.upenn.edu))

## SUPPLEMENTAL MATERIAL

To examine the reproducibility of our findings, we repeated the following three additional analyses.

### **SUPPLEMENTAL ANALYSIS 1:**

In this first supplemental analysis, we repeated our atlas-based methodology reported in the main text and analyzed the Human Connectome Project (HCP) sample ( $n=100$ ) using an additional commonly-used atlas: the HCP multi-modal cortical parcellation (360 brain regions).

#### Structure-Function Coupling Variations along the Cortical Hierarchy

In the 7 resting-state systems, structure-function coupling (SFC) was highest in the primary visual and somatomotor cortices, intermediate in the default mode, dorsal attention, fronto-parietal, and ventral attention association systems, and lowest in the limbic system (**Supplemental Figure 1A; Supplemental Table 5**). A decrease in SFC along the unimodal-transmodal hierarchy was also evident along the principal functional gradient, in the form of a significant negative correlation between a brain region's SFC and its assigned principal gradient scalar (**Supplemental Figure 1C**;  $r=-0.41$ ;  $p_{spin}=5\times 10^{-4}$ ); lower assignments within this gradient capture primary sensory and motor regions, whereas higher assignments capture regions within the default mode network. Across the 5 cyto-architectonic classes, SFC gradually decreased from granular (typically capturing sensory regions) to agranular (typically capturing motor and association regions) types and displayed its lowest value in the polar cortical type (**Supplemental Figure 1B; Supplemental Table 6**). Similarly, we observed a significant negative correlation between a brain region's SFC and its assigned location along the BigBrain gradient of microstructure profile covariance (**Supplemental Figure 1D**;  $r=-0.33$ ;  $p_{spin}=0.032$ ); primary sensory regions occupy the lower end of this gradient while limbic regions represent its apex.

We next computed each brain region's average temporal SFC variance across subjects and examined its heterogeneous expression along the unimodal (sensory)-transmodal (association) hierarchy. In contrast to SFC, temporal SFC variance was highest in the limbic system, intermediate in the default mode and fronto-parietal systems, and lowest in the primary visual, somatomotor, dorsal attention, and ventral attention systems (**Supplemental Figure 2A; Supplemental Table 7**); a pronounced increase in temporal SFC variance was observed along the unimodal-transmodal hierarchy, as captured by the principal gradient (**Supplemental Figure 2C**;  $r=0.42$ ;  $p_{spin}=0.007$ ). Using cyto-architectonic annotations, temporal SFC variance (unlike SFC itself) was highest in the polar cortical type; the remaining 4 cortical types displayed similar degrees of temporal SFC variance (**Supplemental Figure 2B; Supplemental Table 8**). Under the more continuous BigBrain gradient, we observed a significant positive correlation between a brain region's temporal SFC variance and its assigned location along the gradient (**Supplemental Figure 2D**;  $r=0.48$ ;  $p_{spin}=0.011$ ). As with the Schaefer atlas, in order to ensure that the correlations observed between a brain region's temporal SFC variance and its location in the sensory-association hierarchy (as shown in **Supplementary Figures 2C and 2D**) were not confounded by

the presence of any outlier regions, we repeated the aforementioned analyses after excluding the outlier brain regions. An outlier brain region was defined as one that exhibited a temporal SFC variance at least three standard deviations away from the mean ( $n=7$ ). Both correlations remained significant (temporal SFC variance vs. principal functional gradient:  $r=0.40$ ;  $p_{spin}=0.007$ , and temporal SFC variance vs. BigBrain gradient:  $r=0.46$ ;  $p_{spin}=0.015$ )—same as when including the outliers in the analysis.

### Biological Correlates of Structure-Function Coupling: Whole-brain perspective

Across the 360 brain regions defined by the HCP multi-modal cortical parcellation, we observed a significant positive correlation between SFC and intracortical myelin content (**Supplemental Figure 3A**;  $r=0.53$ ;  $p_{spin}<10^{-4}$ ), and a negative correlation between temporal SFC variance and intracortical myelin content (**Supplemental Figure 3B**;  $r=-0.31$ ;  $p_{spin}=0.034$ ). Higher SFC values corresponded to larger Hurst exponents and thus a decreased excitation-inhibition (EI) ratio (**Supplemental Figure 3C**;  $r=0.37$ ;  $p_{spin}=0.008$ ), whereas higher temporal variance in SFC corresponded to lower Hurst exponents and thus a heightened EI-ratio (**Supplemental Figure 3D**;  $r=-0.56$ ;  $p_{spin}<10^{-4}$ ). There was no significant association, however, between SFC and the Hurst exponent across temporal windows (average Spearman's  $\rho$  across brain regions:  $-0.02$ ;  $p_{fisher} (FDR-corrected)=1$ ), indicating that SFC and EI-ratio do not co-fluctuate over short periods of time (i.e., the duration of the fMRI scan), when examined on the macroscale level.

To ensure that the association between a region's SFC and either biological marker was independent of the other marker and also independent from that region's position along the cortical hierarchy, we re-examined the above relationships using multiple linear regression models. We found that SFC (dependent variable) was independently and positively correlated with intracortical myelin content ( $\beta_{stand}=0.375$ ; 95% non-parametric bootstrap confidence interval [BCI]=[0.379, 0.381];  $p<10^{-4}$ ; variance inflation factor [VIF]=1.45) and with the Hurst exponent ( $\beta_{stand}=0.368$ ; 95% BCI=[0.368, 0.370];  $p<10^{-4}$ ; VIF=1.30), after adjusting for the other biological marker, the interaction effect between intracortical myelination and the Hurst exponent, as well as the principal gradient and BigBrain scalar assignments. Further, the correspondence between temporal SFC variance (dependent variable) and the Hurst exponent ( $\beta_{stand}=-0.534$ ; 95% BCI=[-0.536, -0.534];  $p<10^{-4}$ ; VIF=1.30), but not intracortical myelin content ( $\beta_{stand}=-0.008$ ; 95% BCI=[-0.005, -0.003];  $p=0.90$ ; VIF=1.45), remained significant after adjusting for the other marker, the interaction effect between intracortical myelination and the Hurst exponent, and the principal gradient and BigBrain scalar assignments. Similarly to the atlas-based analysis reported in the manuscript, the Hurst exponent was found to significantly mediate the correlation between intracortical myelination and temporal SFC variance (total effect=-0.0045;  $p<10^{-4}$ , indirect effect=-0.0014; BCI=[-0.0025, -0.0004]). In other words, the Hurst exponent (i.e., EI-ratio) accounted for 31.1% of the correlation between intracortical myelination and temporal SFC variance.

### Biological Correlates of Structure-Function Coupling: Regional perspective

As with the atlas-based analysis reported in the manuscript, we begin with the cyto-architectonic class that displayed the overall highest SFC: the granular type. We observed a significant positive association between SFC (dependent variable) and the Hurst exponent but not with intracortical myelin content, after adjusting for the effects of the other biological marker (**Supplemental Table**

**9A**). In the parietal and frontal types, we observed a significant positive association between SFC and the Hurst exponent as well as the intracortical myelin content (**Supplemental Table 9A**). Within the agranular cyto-architectonic class, we observed that SFC was positively correlated only with intracortical myelin content but not with the Hurst exponent, within the same regression model (**Supplemental Table 9A**). Taking these results together, we once again notice a distinct pattern as we transition from granular to agranular cortical regions: a gradual shift from the Hurst exponent to intracortical myelin content as being the principal predictor of SFC (as supported by the numerical changes in the standardized  $\beta$  and false discovery rate-adjusted  $p$ -values: **Supplemental Table 9A**; **Figure 7**). As with the atlas-based analysis using the Schaefer 400 parcellation reported in the manuscript, the polar cortical regions were once again an exception to this rule (**Supplemental Table 9A**).

Interestingly—and in agreement with the atlas-based results reported in the manuscript—dynamic regulation of temporal SFC variance (as opposed to SFC itself) was more persistently dependent upon the Hurst exponent, across all cyto-architectonic classes, after adjusting for the effects of intracortical myelin content (**Supplemental Table 9B**).

## **SUPPLEMENTAL ANALYSIS 2:**

Next, we repeated the same atlas-based methodology to analyze the subjects within the HCP sample ( $n=100$ ) reported in the main text, with one difference: instead of averaging the demeaned and normalized pre-processed time series corresponding to the four runs into one average run (1200 volumes), we concatenated all four runs across time (1200 volumes  $\times$  4 runs) for each subject. The results of this analyses were qualitatively identical to the ones reported in the main text for both cortical parcellations (Schaefer cortical parcellation: 400 brain regions; HCP multi-modal cortical parcellation: 360 brain regions); we separately report the results corresponding to each cortical parcellation below.

### **Supplemental Analysis 2A:** Schaefer cortical parcellation (400 brain regions)

#### **Structure-Function Coupling Variations along the Cortical Hierarchy**

In the 7 resting-state systems, SFC was highest in the primary visual and somatomotor cortices, intermediate in the default mode, dorsal attention, fronto-parietal, and ventral attention association systems, and lowest in the limbic system (**Supplemental Figure 4A**; **Supplemental Table 10**). A decrease in SFC along the unimodal-transmodal hierarchy was also evident along the principal functional gradient, in the form of a significant negative correlation between a brain region's SFC and its assigned principal gradient scalar (**Supplemental Figure 4C**;  $r=-0.34$ ;  $p_{spin}=0.009$ ); lower assignments within this gradient capture primary sensory and motor regions, whereas higher assignments capture regions within the default mode network. Across the 5 cyto-architectonic classes, SFC gradually decreased from granular (typically capturing sensory regions) to agranular (typically capturing motor and association regions) types and displayed its lowest value in the polar cortical type (**Supplemental Figure 4B**; **Supplemental Table 11**). Similarly, we observed a significant negative correlation between a brain region's SFC and its assigned location along the BigBrain gradient of microstructure profile covariance (**Supplemental Figure 4D**;  $r=-0.39$ ;



$p_{spin}=0.025$ ); primary sensory regions occupy the lower end of this gradient while limbic regions represent its apex.

Next, in order to examine how much SFC deviated from its mean value over time, we assessed its moment-to-moment variance throughout the duration of the resting-state fMRI scan. Specifically, we computed each brain region's average temporal SFC variance across subjects and examined its heterogeneous expression along the unimodal (sensory)-transmodal (association) hierarchy. In contrast to SFC, temporal SFC variance was highest in the limbic system (**Supplemental Figure 5A**; **Supplemental Table 12**); an increase in temporal SFC variance was observed along the unimodal-transmodal hierarchy, as captured by the principal gradient (**Supplemental Figure 5C**;  $r=0.20$ ;  $p_{spin}=0.096$ ). Using cyto-architectonic annotations, temporal SFC variance (unlike SFC itself) was highest in the polar cortical type; the remaining 4 cortical types displayed—for the most part—similar degrees of temporal SFC variance (**Supplemental Figure 5B**; **Supplemental Table 13**). Under the more continuous BigBrain gradient, we observed a significant positive correlation between a brain region's temporal SFC variance and its assigned location along the gradient (**Supplemental Figure 5D**;  $r=0.32$ ;  $p_{spin}=0.035$ ). To ensure that the correlations observed between a brain region's temporal SFC variance and its location in the sensory-association hierarchy (as shown in **Supplemental Figures 5C** and **5D**) were not confounded by the presence of any outlier regions, we repeated the aforementioned analyses after excluding the outlier brain regions. As before, an outlier brain region was defined as one that exhibited a temporal SFC variance at least three standard deviations away from the mean ( $n=8$ ). Both correlations remained qualitatively the same: the association between temporal SFC variance and principal functional gradient remained positive, albeit non-significant ( $r=0.17$ ;  $p_{spin}=0.108$ ), whereas the association between temporal SFC variance and the BigBrain gradient remained significant ( $r=0.29$ ;  $p_{spin}=0.040$ )—same as when the outliers were included.

### Biological Correlates of Structure-Function Coupling: Whole-brain perspective

Across the 400 brain regions defined by the Schaefer parcellation, we observed a significant positive correlation between SFC and intracortical myelin content (**Supplemental Figure 6A**;  $r=0.49$ ;  $p_{spin}=10^{-4}$ ), and a negative, albeit non-significant, correlation between temporal SFC variance and intracortical myelin content (**Supplemental Figure 6B**;  $r=-0.08$ ;  $p_{spin}=0.311$ ). Higher SFC values corresponded to larger Hurst exponents and thus a decreased EI-ratio (**Supplemental Figure 6C**;  $r=0.41$ ;  $p_{spin}=9 \times 10^{-4}$ ), whereas higher temporal variance in SFC corresponded to lower Hurst exponents and thus a heightened EI-ratio (**Supplemental Figure 6D**;  $r=-0.44$ ;  $p_{spin}<10^{-4}$ ).

To ensure that the association between a region's SFC and either biological marker was independent of the other marker and also independent from that region's position along the cortical hierarchy, we re-examined the above relationships using multiple linear regression models. We found that SFC (dependent variable) was independently and positively correlated with intracortical myelin content ( $\beta_{stand}=0.382$ ; 95% non-parametric bootstrap confidence interval [BCI]=[0.381, 0.382];  $p<10^{-4}$ ; variance inflation factor [VIF]=1.85) and with the Hurst exponent ( $\beta_{stand}=0.366$ ; 95% BCI=[0.367, 0.369];  $p<10^{-4}$ ; VIF=1.24), after adjusting for the other biological marker, the interaction effect between intracortical myelination and the Hurst exponent, as well as the principal gradient and BigBrain scalar assignments. Further, the correspondence between temporal SFC variance (dependent variable) and both intracortical myelin content ( $\beta_{stand}=0.145$ ; 95%

$BCI=[0.143, 0.144]$ ;  $p=4 \times 10^{-4}$ ;  $VIF=1.85$ ) and the Hurst exponent ( $\beta_{stand}=-0.406$ ; 95%  $BCI=[-0.405, -0.403]$ ;  $p < 10^{-4}$ ;  $VIF=1.24$ ), remained significant after adjusting for the other marker, the interaction effect between intracortical myelination and the Hurst exponent, and the principal gradient and BigBrain scalar assignments. Notably, the interaction effect between intracortical myelination and the Hurst exponent was significant within this model ( $\beta_{stand}=0.345$ ; 95%  $BCI=[0.342, 0.345]$ ;  $p < 10^{-4}$ ;  $VIF=1.08$ ); a potential causal relationship between temporal SFC variance, intracortical myelination, and the Hurst exponent was further explored via a mediation model. Notably, the Hurst exponent was found to significantly mediate the correlation between intracortical myelination and temporal SFC variance (total effect=-0.005;  $p < 10^{-4}$ , indirect effect=-0.002;  $BCI=[-0.0037, -0.0007]$ ). In other words, the Hurst exponent (i.e., EI-ratio) accounted for 40% of the correlation between intracortical myelination and temporal SFC variance.

### Biological Correlates of Structure-Function Coupling: Regional perspective

We begin with the cyto-architectonic class that displayed the highest SFC: the granular type. We observed a significant positive association between SFC (dependent variable) and the Hurst exponent but not with intracortical myelin content, after adjusting for the effects of the other biological marker (**Supplemental Table 14A**). In the parietal and frontal types, we observed a significant positive association between SFC and the Hurst exponent as well as the intracortical myelin content (**Supplemental Table 14A**). Within the agranular cyto-architectonic class, we observed that SFC was positively correlated only with intracortical myelin content but not with the Hurst exponent, within the same regression model (**Supplemental Table 14A**). Taking these results together, we notice once again a distinct pattern as we transition from granular to agranular cortical regions: a gradual shift from the Hurst exponent to intracortical myelin content as being the principal predictor of SFC (as supported by the numerical changes in the standardized  $\beta$  and false discovery rate-adjusted  $p$ -values: **Supplemental Table 14A**; **Figure 7**). Importantly, this pattern was also reproduced with the HCP multi-modal (360 regions) cortical parcellation (**Supplemental Analysis 2B** below; **Supplemental Table 19**). Notably, the cortical type with the lowest SFC and relatively high levels of granularization—the polar type—was an exception to this rule, with SFC not being significantly correlated with either intracortical myelin content or the Hurst exponent (**Supplemental Table 14A**; **Supplemental Material: Methodological Considerations and Study Limitations**).

Interestingly, dynamic regulation of temporal SFC variance (as opposed to SFC itself) was more persistently dependent upon the Hurst exponent, across the cyto-architectonic classes. Specifically, temporal SFC variance independently and significantly correlated only with the Hurst exponent across all cortical types, after adjusting for the effects of intracortical myelin content (**Supplemental Table 14B**).

### **Supplemental Analysis 2B:** HCP multi-modal cortical parcellation (360 brain regions)

#### Structure-Function Coupling Variations along the Cortical Hierarchy

In the 7 resting-state systems, SFC was highest in the primary visual and somatomotor cortices, intermediate in the default mode, dorsal attention, fronto-parietal, and ventral attention association

systems, and lowest in the limbic system (**Supplemental Figure 7A; Supplemental Table 15**). A decrease in SFC along the unimodal-transmodal hierarchy was also evident along the principal functional gradient, in the form of a significant negative correlation between a brain region's SFC and its assigned principal gradient scalar (**Supplemental Figure 7C;  $r=-0.40$ ;  $p_{spin}=4.5 \times 10^{-4}$** ); lower assignments within this gradient capture primary sensory and motor regions, whereas higher assignments capture regions within the default mode network. Across the 5 cyto-architectonic classes, SFC gradually decreased from granular (typically capturing sensory regions) to agranular (typically capturing motor and association regions) types and displayed its lowest value in the polar cortical type (**Supplemental Figure 7B; Supplemental Table 16**). Similarly, we observed a significant negative correlation between a brain region's SFC and its assigned location along the BigBrain gradient of microstructure profile covariance (**Supplemental Figure 7D;  $r=-0.31$ ;  $p_{spin}=0.039$** ); primary sensory regions occupy the lower end of this gradient while limbic regions represent its apex.

We next computed each brain region's average temporal SFC variance across subjects and examined its heterogeneous expression along the unimodal (sensory)-transmodal (association) hierarchy. In contrast to SFC, temporal SFC variance was highest in the limbic system (**Supplemental Figure 8A; Supplemental Table 17**); a pronounced increase in temporal SFC variance was observed along the unimodal-transmodal hierarchy, as captured by the principal gradient (**Supplemental Figure 8C;  $r=0.31$ ;  $p_{spin}=0.047$** ). Using cyto-architectonic annotations, temporal SFC variance (unlike SFC itself) was highest in the polar cortical type; the remaining 4 cortical types displayed similar degrees of temporal SFC variance (**Supplemental Figure 8B; Supplemental Table 18**). Under the more continuous BigBrain gradient, we observed a significant positive correlation between a brain region's temporal SFC variance and its assigned location along the gradient (**Supplemental Figure 8D;  $r=0.46$ ;  $p_{spin}=0.024$** ). As with the Schaefer atlas, in order to ensure that the correlations observed between a brain region's temporal SFC variance and its location in the sensory-association hierarchy (as shown in **Supplementary Figures 8C and 8D**) were not confounded by the presence of any outlier regions, we repeated the aforementioned analyses. After identifying the outlier regions ( $n=9$ ), we excluded them and repeated the analyses reported in these figures. Both correlations remained significant (temporal SFC variance vs. principal functional gradient:  $r=0.29$ ;  $p_{spin}=0.049$ , and temporal SFC variance vs. BigBrain gradient:  $r=0.44$ ;  $p_{spin}=0.027$ )—same as when including the outliers in the analysis.

### Biological Correlates of Structure-Function Coupling: Whole-brain perspective

Across the 360 brain regions defined by the HCP multi-modal cortical parcellation, we observed a significant positive correlation between SFC and intracortical myelin content (**Supplemental Figure 9A;  $r=0.53$ ;  $p_{spin}<10^{-4}$** ), and a negative, albeit non-significant, correlation between temporal SFC variance and intracortical myelin content (**Supplemental Figure 9B;  $r=-0.19$ ;  $p_{spin}=0.169$** ). Higher SFC values corresponded to larger Hurst exponents and thus a decreased excitation-inhibition (EI) ratio (**Supplemental Figure 9C;  $r=0.33$ ;  $p_{spin}=0.018$** ), whereas higher temporal variance in SFC corresponded to lower Hurst exponents and thus a heightened EI-ratio (**Supplemental Figure 9D;  $r=-0.63$ ;  $p_{spin}<10^{-4}$** ).

To ensure that the association between a region's SFC and either biological marker was independent of the other marker and also independent from that region's position along the cortical

hierarchy, we re-examined the above relationships using multiple linear regression models. We found that SFC (dependent variable) was independently and positively correlated with intracortical myelin content ( $\beta_{stand}=0.402$ ; 95% non-parametric bootstrap confidence interval [BCI]=[0.404, 0.406];  $p<10^{-4}$ ; variance inflation factor [VIF]=1.46) and with the Hurst exponent ( $\beta_{stand}=0.323$ ; 95% BCI=[0.323, 0.325];  $p<10^{-4}$ ; VIF=1.30), after adjusting for the other biological marker, the interaction effect between intracortical myelination and the Hurst exponent, as well as the principal gradient and BigBrain scalar assignments. Further, the correspondence between temporal SFC variance (dependent variable) and both intracortical myelin content ( $\beta_{stand}=0.110$ ; 95% BCI=[0.111, 0.113];  $p=0.002$ ; VIF=1.46) and the Hurst exponent ( $\beta_{stand}=-0.610$ ; 95% BCI=[-0.611, -0.609];  $p<10^{-4}$ ; VIF=1.30) remained significant after adjusting for the other marker, the interaction effect between intracortical myelination and the Hurst exponent, and the principal gradient and BigBrain scalar assignments. Notably, the interaction effect between intracortical myelination and the Hurst exponent was significant within this model ( $\beta_{stand}=0.171$ ; 95% BCI=[0.169, 0.170];  $p=2\times 10^{-4}$ ; VIF=1.09); a potential causal relationship between temporal SFC variance, intracortical myelination, and the Hurst exponent was further explored via a mediation model. Similarly to the atlas-based analysis reported in the manuscript, the Hurst exponent was found to significantly mediate the correlation between intracortical myelination and temporal SFC variance (total effect=-0.003;  $p=10^{-4}$ , indirect effect=-0.0015; BCI=[-0.0027, -0.0004]). In other words, the Hurst exponent (i.e., EI-ratio) accounted for 50% of the correlation between intracortical myelination and temporal SFC variance.

### Biological Correlates of Structure-Function Coupling: Regional perspective

As with the atlas-based analysis reported in the manuscript, we begin with the cyto-architectonic class that displayed the overall highest SFC: the granular type. We observed a significant positive association between SFC (dependent variable) and the Hurst exponent but not with intracortical myelin content, after adjusting for the effects of the other biological marker (**Supplemental Table 19A**). In the parietal and frontal types, we observed a significant positive association between SFC and the Hurst exponent as well as the intracortical myelin content (**Supplemental Table 19A**). Within the agranular cyto-architectonic class, we observed that SFC was positively correlated only with intracortical myelin content but not with the Hurst exponent, within the same regression model (**Supplemental Table 19A**). Taking these results together, we once again notice a distinct pattern as we transition from granular to agranular cortical regions: a gradual shift from the Hurst exponent to intracortical myelin content as being the principal predictor of SFC (as supported by the numerical changes in the standardized  $\beta$  and false discovery rate-adjusted  $p$ -values: **Supplemental Table 19A**; **Figure 7**). As with the atlas-based analysis using the Schaefer 400 parcellation reported in the manuscript and in Supplemental Analyses 1 and 2A above, the polar cortical regions were once again an exception to this rule (**Supplemental Table 19A**).

Interestingly—and in agreement with the atlas-based results reported in the manuscript as well as Supplemental Analyses 1 and 2A—dynamic regulation of temporal SFC variance (as opposed to SFC itself) was more persistently dependent upon the Hurst exponent, across the cyto-architectonic classes. Specifically, temporal SFC variance independently correlated only with the Hurst exponent across all cortical types, after adjusting for the effects of intracortical myelin content (**Supplemental Table 19B**).

### **SUPPLEMENTAL ANALYSIS 3:**

Lastly, in addition to processing the subjects from our Penn sample ( $n=14$ ) using our voxel-based methodology reported in the manuscript, we also analyzed them using the coarser atlas-based Schaefer cortical parcellation (400 brain regions). We report the results below.

#### **Structure-Function Coupling Variations along the Cortical Hierarchy**

In the 7 resting-state systems, SFC was highest in the primary visual and somatomotor cortices, intermediate in the ventral attention and limbic systems, and lowest in the dorsal attention, fronto-parietal, and default mode systems (**Supplemental Figure 10A; Supplemental Table 20**). A decrease in SFC along the unimodal-transmodal hierarchy was also evident along the principal functional gradient, in the form of a significant negative correlation between a brain region's SFC and its assigned principal gradient scalar (**Supplemental Figure 10C;  $r=-0.19$ ;  $p_{spin}=0.014$** ); lower assignments within this gradient capture primary sensory and motor regions, whereas higher assignments capture regions within the default mode network. Across the 5 cyto-architectonic classes, SFC gradually decreased from granular (typically capturing sensory regions) to agranular (typically capturing motor and association regions) types (**Supplemental Figure 10B; Supplemental Table 21**). Similarly, we observed a negative, albeit non-significant, correlation between a brain region's SFC and its assigned location along the BigBrain gradient of microstructure profile covariance (**Supplemental Figure 10D;  $r=-0.04$ ;  $p_{spin}=0.362$** ); primary sensory regions occupy the lower end of this gradient while limbic regions represent its apex.

We next computed each brain region's average temporal SFC variance across subjects and examined its heterogeneous expression along the unimodal (sensory)-transmodal (association) hierarchy. In contrast to SFC, temporal SFC variance was highest in the fronto-parietal and limbic systems, and lowest in the primary visual cortex (**Supplemental Figure 11A; Supplemental Table 22**); a pronounced increase in temporal SFC variance was observed along the unimodal-transmodal hierarchy, as captured by the principal gradient (**Supplemental Figure 11C;  $r=0.22$ ;  $p_{spin}=0.030$** ). Using cyto-architectonic annotations, temporal SFC variance was highest in the agranular cortex and lowest in the parietal and granular cortices (**Supplemental Figure 11B; Supplemental Table 23**). Under the more continuous BigBrain gradient, we observed a positive correlation between a brain region's temporal SFC variance and its assigned location along the gradient (**Supplemental Figure 11D;  $r=0.21$ ;  $p_{spin}=0.082$** ). Similar to Supplemental Analyses 1 and 2, we wanted to ensure that the correlations observed between a brain region's temporal SFC variance and its location in the sensory-association hierarchy (as shown in **Supplemental Figures 11C and 11D**) were not confounded by the presence of any outlier regions. After identifying the outlier regions ( $n=10$ ), we excluded them and repeated the analyses reported in these figures. Both correlations remained qualitatively the same as when the outliers were included: the association between temporal SFC variance and principal functional gradient remained significant ( $r=0.22$ ;  $p_{spin}=0.047$ ), whereas the association between temporal SFC variance and the BigBrain gradient remained insignificant ( $r=0.21$ ;  $p_{spin}=0.084$ ).

#### **Biological Correlates of Structure-Function Coupling: Whole-brain perspective**

Across the 400 brain regions defined by the Schaefer cortical parcellation, we observed a significant positive correlation between SFC and intracortical myelin content (**Supplemental Figure 12A**;  $r=0.21$ ;  $p_{spin}=0.003$ ), and a significant negative correlation between temporal SFC variance and intracortical myelin content (**Supplemental Figure 12B**;  $r=-0.44$ ;  $p_{spin}<10^{-4}$ ). Higher SFC values corresponded to larger Hurst exponents and thus a decreased excitation-inhibition (EI) ratio (**Supplemental Figure 12C**;  $r=0.11$ ;  $p_{spin}=0.090$ ), whereas higher temporal variance in SFC corresponded to lower Hurst exponents and thus a heightened EI-ratio (**Supplemental Figure 12D**;  $r=-0.22$ ;  $p_{spin}=0.037$ ).

To ensure that the association between a region's SFC and either biological marker was independent of the other marker and also independent from that region's position along the cortical hierarchy, we re-examined the above relationships using multiple linear regression models. We found that SFC (dependent variable) was independently and positively correlated with intracortical myelin content ( $\beta_{stand}=0.230$ ; 95% non-parametric bootstrap confidence interval [BCI]=[0.230, 0.233];  $p<10^{-4}$ ; variance inflation factor [VIF]=1.35) and the Hurst exponent ( $\beta_{stand}=0.110$ ; 95% BCI=[0.110, 0.111];  $p=0.018$ ; VIF=1.29), after adjusting for the other biological marker, the interaction effect between intracortical myelination and the Hurst exponent, as well as the principal gradient and BigBrain scalar assignments. Further, the correspondence between temporal SFC variance (dependent variable) and both the intracortical myelin content ( $\beta_{stand}=-0.341$ ; 95% BCI=[-0.343, -0.341];  $p<10^{-4}$ ; VIF=1.35) and the Hurst exponent ( $\beta_{stand}=-0.175$ ; 95% BCI=[-0.176, -0.174];  $p=2\times 10^{-4}$ ; VIF=1.29) remained significant after adjusting for the other marker, the interaction effect between intracortical myelination and the Hurst exponent, and the principal gradient and BigBrain scalar assignments. In contrast to the atlas-based analysis reported in the manuscript, the interaction effect between intracortical myelin content and the Hurst exponent was not significant in this model ( $p=0.49$ ), and the Hurst exponent was not found to mediate the correlation between intracortical myelination and temporal SFC variance (total effect=-0.161; indirect effect=0.0015; BCI=[-0.006, 0.011]); these findings could be attributed to the Penn sample's significantly smaller sample size.

### Biological Correlates of Structure-Function Coupling: Regional perspective

We begin with the cyto-architectonic class that displayed the highest SFC: the granular type. We observed a trend towards a positive association between SFC (dependent variable) and the Hurst exponent but not with intracortical myelin content, after adjusting for the effects of the other biological marker (**Supplemental Table 24A**). In the parietal type, we observed a significant positive association between SFC and the Hurst exponent as well as the intracortical myelin content (**Supplemental Table 24A**). Within the agranular cyto-architectonic class, we observed that SFC was positively correlated only with intracortical myelin content but not with the Hurst exponent, within the same regression model (**Supplemental Table 24A**). Generally, we notice once again this trend where intracortical myelin content—rather than the Hurst exponent—correlates with SFC in the less granular layers; as we traverse from agranular to granular cortical layers, however, the effect size of the Hurst exponent in predicting SFC increases (**Supplemental Table 24A**).

Lastly, the dynamic regulation of temporal SFC variance appeared to be dependent upon both intracortical myelin content and the Hurst exponent, across most cyto-architectonic classes

(**Supplemental Table 24B**); this finding could point towards the concerted interaction between the two variables in determining the extent of SFC fluctuations across time.

## METHODOLOGICAL CONSIDERATIONS AND STUDY LIMITATIONS

Several methodological considerations and limitations are pertinent to our work. First, in order to quantify the overall degree to which SFC fluctuates over time (i.e., throughout the duration of the functional scan), we used the statistical metric of *variance* (see **Methods: Structure-Function Coupling**). Although other metrics for variability such as standard deviation or coefficient of variation could have been used to assess temporal SFC fluctuations over time, we chose variance because it is mathematically related to the standard deviation (i.e., its squared value), does not get adjusted by the mean of the data (like the coefficient of variation), and accounts for the total number of data points considered (**Equation 1**). Moreover, our choice to measure the temporal SFC variance by splitting the duration of the functional scan into 20 continuous temporal windows served the purpose of generating time windows that captured a few minutes of functional activity. Given the differences in functional scan duration and repetition time across the two participant groups (Human Connectome Project [HCP] and Penn samples) and across our processing pipelines, each of the 20 time windows corresponded to ~40 seconds of functional activity in the atlas-based analyses (HCP sample) described in the main manuscript and Supplemental Analysis 1, ~3 minutes of functional activity in the atlas-based analyses (HCP sample) described in Supplemental Analyses 2A and 2B, and 1 minute of functional activity in the atlas- and voxel-based analyses derived from analyzing the Penn sample (Supplemental Analysis 3 and main manuscript). Even though the duration of each time window could be expected to influence the corresponding temporal SFC variance, our results remained largely consistent across all analyses utilizing varying window durations. Future studies, however, should further vary the number of time windows (with or without temporal overlap) and examine whether—and to what extent—this choice impacts the resulting SFC variability over time.

Another important methodological consideration was the choice of metrics used to non-invasively assess the biological substrates of intracortical myelination and EI-ratio. For the former, we used the previously validated T1-weighted/T2-weighted signal intensity ratio approach (see **Methods: Intracortical Myelination**), as it accurately detects myelo-architectonic boundaries, is a good proxy of myelin concentration, yields a high signal-to-noise ratio, and has high test-retest reliability.<sup>1-7</sup> Recent studies, however, have suggested that the T1-weighted/T2-weighted ratio captures not only myelination but also inflammation and iron accumulation—an aspect that becomes particularly relevant when examining myelination levels within the subcortical gray matter regions.<sup>2,6,8,9</sup> Here, however, we only analyzed cortical regions; moreover, both participant groups consisted of healthy young adults where pathological or aberrant levels of microstructural markers (e.g., iron levels, inflammation, edemas, atrophy) would not be expected. Nonetheless, future studies could apply other proposed methods to non-invasively quantify myelin content (e.g., magnetization transfer, simultaneous tissue relaxometry, etc.)<sup>8-10</sup> and examine how the relation between the estimated myelin content and SFC varies.

Furthermore, we used a recently published approach to non-invasively quantify the balance between synaptic excitation and inhibition across the human cortex, using the Hurst exponent of

the resting-state blood oxygen level-dependent (BOLD) signal time-series.<sup>11</sup> Building upon prior work,<sup>12</sup> this recent study demonstrated *in silico* and *in vivo* that changes in the Hurst exponent of the functional BOLD signal time-series reflect shifts in the synaptic EI-ratio.<sup>11</sup> We do acknowledge, however, the inherent limitations of these measurements: namely, changes in synaptic excitation and inhibition occur in timescales significantly smaller than the ones captured by the resting-state functional scans acquired. In addition, using the Hurst exponent of the signal time-series is an indirect assessment of the macroscale EI-ratio; a more direct—while still non-invasive—approach, for instance, could involve tracking the dynamical release and re-uptake of glutamatergic and GABA(Gamma-aminobutyric acid)-ergic neurotransmitters using pharmacological (functional) magnetic resonance imaging.<sup>13</sup>

Regarding our results, it should be noted that there was one main distinction between our atlas- and voxel-based results discussed in section: ‘Biological Correlates of Structure-Function Coupling: Regional perspective,’ pertaining to the relationship between SFC and the biological substrates of interest within the polar cyto-architectonic class. More specifically, within the atlas-based analyses, there was no significant association between SFC and intracortical myelination when using the Schaefer 400 atlas, and a significant association between SFC and intracortical myelination but of the opposite directionality (i.e., a negative standardized  $\beta$  coefficient) when using the HCP multi-modal atlas. The association between SFC and the Hurst exponent was non-significant in either atlas-based analysis, within the polar cortical class. In contrast, within the voxel-based analyses, there was a significant association between SFC and both independent variables across the polar cortical regions; further, that correlation fit the broader pattern discussed in our Results and Discussion sections pointing to a gradual transition from the Hurst exponent to the intracortical myelination as the principal predictor of SFC, as we traverse from granular to progressively less granular cortical regions. This discrepancy between the atlas- and voxel-based analyses could be attributed to the relatively small number of cortical regions classified as ‘polar’ in the atlas-based analyses (23/400 cortical regions in the Schaefer 400 atlas and 23/360 cortical regions in the HCP multi-modal atlas). This difference could result in limited statistical power—especially given that multiple linear regression models were invoked—to capture the underlying dynamics. The potential issue of statistical power was overcome, however, by our voxel-based analyses wherein thousands of brain regions per subject (i.e., cortical voxels) were classified as ‘polar.’

Lastly, even though the goal of this study was to identify the biological substrates that mediate how strongly coupled the functional connectivity is to the structural connectivity, we do acknowledge that—in addition to intracortical myelination and EI-ratio—there could be a number of other biological markers that could contribute towards this coupling. Specific examples could include (i) cyto-architectonic properties, such as the underlying neuronal density, neuronal size, and firing behavior (e.g., tonic versus burst firing) patterns found in different brain regions, and (ii) other neuromodulatory properties, such as the contribution of various neurotransmitters and neuropeptides, and their heterogeneous effects on different brain regions.

## Equation 1



$$\text{Temporal SFC Variance} = \frac{1}{N-1} \sum_{i=1}^N |x_i - \mu|^2 \quad (1)$$

where  $N$  is the total number of temporal windows used in the analysis (here,  $N = 20$ ),  $x_i$  is the structure-function coupling at temporal window  $i$ , and  $\mu$  the mean structure-function coupling across the  $N$  temporal windows.

## TABLES

### Supplemental Table 1

#### Multiple Comparisons

Dependent Variable: Structure-Function Coupling

Test: Tamhane

| (I) Resting-state functional networks | (J) Resting-state functional networks | Mean Difference (I-J) | Std. Error    | Sig.  | 95% Confidence Interval |               |
|---------------------------------------|---------------------------------------|-----------------------|---------------|-------|-------------------------|---------------|
|                                       |                                       |                       |               |       | Lower Bound             | Upper Bound   |
| Visual                                | Somatomotor                           | .013437154257         | .010935000532 | .995  | -.02034806770           | .04722237621  |
|                                       | Dorsal Attention                      | .076266028035*        | .013452090181 | <.001 | .03425349044            | .11827856563  |
|                                       | Ventral Attention                     | .113438364384*        | .011973840778 | <.001 | .07618490991            | .15069181886  |
|                                       | Limbic                                | .144780830272*        | .014886094533 | <.001 | .09697103687            | .19259062368  |
|                                       | Fronto-parietal                       | .088606331042*        | .012236231460 | <.001 | .05058990642            | .12662275566  |
|                                       | Default Mode                          | .064906919745*        | .009751748353 | <.001 | .03471470277            | .09509913672  |
| Somatomotor                           | Visual                                | -.013437154257        | .010935000532 | .995  | -.04722237621           | .02034806770  |
|                                       | Dorsal Attention                      | .062828873778*        | .013352469165 | <.001 | .02114846810            | .10450927946  |
|                                       | Ventral Attention                     | .100001210126*        | .011861811226 | <.001 | .06314274281            | .13685967745  |
|                                       | Limbic                                | .131343676015*        | .014796131692 | <.001 | .08379937256            | .17888797947  |
|                                       | Fronto-parietal                       | .075169176784*        | .012126626197 | <.001 | .03753700762            | .11280134595  |
|                                       | Default Mode                          | .051469765488*        | .009613859710 | <.001 | .02182279699            | .08111673398  |
| Dorsal Attention                      | Visual                                | -.076266028035*       | .013452090181 | <.001 | -.11827856563           | -.03425349044 |
|                                       | Somatomotor                           | -.062828873778*       | .013352469165 | <.001 | -.10450927946           | -.02114846810 |
|                                       | Ventral Attention                     | .037172336349         | .014215732804 | .199  | -.00719833189           | .08154300458  |
|                                       | Limbic                                | .068514802237*        | .016742461188 | .003  | .01546224091            | .12156736356  |
|                                       | Fronto-parietal                       | .012340303007         | .014437435940 | 1.000 | -.03266045089           | .05734105691  |
|                                       | Default Mode                          | -.011359108290        | .012402047900 | 1.000 | -.05033464293           | .02761642635  |
| Ventral Attention                     | Visual                                | -.113438364384*       | .011973840778 | <.001 | -.15069181886           | -.07618490991 |
|                                       | Somatomotor                           | -.100001210126*       | .011861811226 | <.001 | -.13685967745           | -.06314274281 |
|                                       | Dorsal Attention                      | -.037172336349        | .014215732804 | .199  | -.08154300458           | .00719833189  |
|                                       | Limbic                                | .031342465889         | .015579606522 | .657  | -.01839391985           | .08107885163  |

|              |                   |                 |                 |               |               |               |
|--------------|-------------------|-----------------|-----------------|---------------|---------------|---------------|
|              | Fronto-parietal   | -.024832033342  | .013071101303   | .730          | -.06551284090 | .01584877422  |
|              | Default Mode      | -.048531444639* | .010780766432   | <.001         | -.08221779017 | -.01484509911 |
| Limbic       | Visual            | -.144780830272* | .014886094533   | <.001         | -.19259062368 | -.09697103687 |
|              | Somatomotor       | -.131343676015* | .014796131692   | <.001         | -.17888797947 | -.08379937256 |
|              | Dorsal Attention  | -.068514802237* | .016742461188   | .003          | -.12156736356 | -.01546224091 |
|              | Ventral Attention | -.031342465889  | .015579606522   | .657          | -.08107885163 | .01839391985  |
|              | Fronto-parietal   | -.056174499231* | .015782161980   | .017          | -.10643794502 | -.00591105344 |
|              | Default Mode      | -.079873910527* | .013944456689   | <.001         | -.12530544522 | -.03444237584 |
|              | Fronto-parietal   | Visual          | -.088606331042* | .012236231460 | <.001         | -.12662275566 |
|              | Somatomotor       | -.075169176784* | .012126626197   | <.001         | -.11280134595 | -.03753700762 |
|              | Dorsal Attention  | -.012340303007  | .014437435940   | 1.000         | -.05734105691 | .03266045089  |
|              | Ventral Attention | .024832033342   | .013071101303   | .730          | -.01584877422 | .06551284090  |
|              | Limbic            | .056174499231*  | .015782161980   | .017          | .00591105344  | .10643794502  |
|              | Default Mode      | -.023699411297  | .011071468838   | .527          | -.05822753236 | .01082870976  |
| Default Mode | Visual            | -.064906919745* | .009751748353   | <.001         | -.09509913672 | -.03471470277 |
|              | Somatomotor       | -.051469765488* | .009613859710   | <.001         | -.08111673398 | -.02182279699 |
|              | Dorsal Attention  | .011359108290   | .012402047900   | 1.000         | -.02761642635 | .05033464293  |
|              | Ventral Attention | .048531444639*  | .010780766432   | <.001         | .01484509911  | .08221779017  |
|              | Limbic            | .079873910527*  | .013944456689   | <.001         | .03444237584  | .12530544522  |
|              | Fronto-parietal   | .023699411297   | .011071468838   | .527          | -.01082870976 | .05822753236  |

\*. The mean difference is significant at the 0.05 level.

**Supplemental Table 1: Mean differences in structure-function coupling across the 7 resting-state functional networks.** One-way ANOVA table with post-hoc correction for multiple comparisons (Tamhane's T2 – equal variances not assumed): Dependent variable: Structure-function coupling; factor: Resting-state functional networks. Data derived from the 100 unrelated HCP subjects, analyzed using the Schaefer 400 atlas.

## Supplemental Table 2

### Multiple Comparisons

Dependent Variable: Structure-Function Coupling

Test: Tamhane

| (I) Cyto-architectonic classes | (J) Cyto-architectonic classes | Mean Difference (I-J) | Std. Error    | Sig.  | 95% Confidence Interval |               |
|--------------------------------|--------------------------------|-----------------------|---------------|-------|-------------------------|---------------|
|                                |                                |                       |               |       | Lower Bound             | Upper Bound   |
| Agranular                      | Frontal                        | -.040037415719*       | .009367735623 | <.001 | -.06665855260           | -.01341627884 |
|                                | Parietal                       | -.069324213535*       | .010774866835 | <.001 | -.09990211603           | -.03874631104 |
|                                | Polar                          | .022819416864         | .018708818333 | .928  | -.03344397781           | .07908281153  |
|                                | Granular                       | -.113045932479*       | .014725716997 | <.001 | -.15700703941           | -.06908482555 |

|          |           |                 |               |       |               |               |
|----------|-----------|-----------------|---------------|-------|---------------|---------------|
| Frontal  | Agranular | .040037415719*  | .009367735623 | <.001 | .01341627884  | .06665855260  |
|          | Parietal  | -.029286797816* | .009078052342 | .015  | -.05502268557 | -.00355091006 |
|          | Polar     | .062856832583*  | .017785757291 | .015  | .00852894352  | .11718472165  |
|          | Granular  | -.073008516760* | .013533662479 | <.001 | -.11437762486 | -.03163940866 |
| Parietal | Agranular | .069324213535*  | .010774866835 | <.001 | .03874631104  | .09990211603  |
|          | Frontal   | .029286797816*  | .009078052342 | .015  | .00355091006  | .05502268557  |
|          | Polar     | .092143630399*  | .018565463825 | <.001 | .03619740163  | .14808985917  |
|          | Granular  | -.043721718944* | .014543153190 | .048  | -.08725419599 | -.00018924190 |
| Polar    | Agranular | -.022819416864  | .018708818333 | .928  | -.07908281153 | .03344397781  |
|          | Frontal   | -.062856832583* | .017785757291 | .015  | -.11718472165 | -.00852894352 |
|          | Parietal  | -.092143630399* | .018565463825 | <.001 | -.14808985917 | -.03619740163 |
|          | Granular  | -.135865349343* | .021105104425 | <.001 | -.19848265117 | -.07324804752 |
| Granular | Agranular | .113045932479*  | .014725716997 | <.001 | .06908482555  | .15700703941  |
|          | Frontal   | .073008516760*  | .013533662479 | <.001 | .03163940866  | .11437762486  |
|          | Parietal  | .043721718944*  | .014543153190 | .048  | .00018924190  | .08725419599  |
|          | Polar     | .135865349343*  | .021105104425 | <.001 | .07324804752  | .19848265117  |

\*. The mean difference is significant at the 0.05 level.

**Supplemental Table 2: Mean differences in structure-function coupling across the 5 von-Economo/Koskinas-inspired cyto-architectonic classes.** One-way ANOVA table with post-hoc correction for multiple comparisons (Tamhane's T2 – equal variances not assumed): Dependent variable: Structure-function coupling; factor: Cyto-architectonic classes. Data derived from the 100 unrelated HCP subjects, analyzed using the Schaefer 400 atlas.

### Supplemental Table 3

#### Multiple Comparisons

Dependent Variable: Temporal Structure-Function Coupling Variance

Test: Tamhane

| (I) Resting-state functional networks | (J) Resting-state functional networks | Mean Difference (I-J) | Std. Error    | Sig.  | 95% Confidence Interval |               |
|---------------------------------------|---------------------------------------|-----------------------|---------------|-------|-------------------------|---------------|
|                                       |                                       |                       |               |       | Lower Bound             | Upper Bound   |
| Visual                                | Somatomotor                           | -.000346001683        | .000182343952 | .730  | -.00091203094           | .00022002758  |
|                                       | Dorsal Attention                      | -.000460281011        | .000215938467 | .531  | -.00113133779           | .00021077577  |
|                                       | Ventral Attention                     | -.000611574354        | .000234505602 | .199  | -.00134127354           | .00011812483  |
|                                       | Limbic                                | -.003954179137*       | .000570500319 | <.001 | -.00584861356           | -.00205974471 |
|                                       | Fronto-parietal                       | -.001053082598*       | .000210402807 | <.001 | -.00170571752           | -.00040044768 |
|                                       | Default Mode                          | -.001337766725*       | .000213111053 | <.001 | -.00199536470           | -.00068016875 |
| Somatomotor                           | Visual                                | .000346001683         | .000182343952 | .730  | -.00022002758           | .00091203094  |
|                                       | Dorsal Attention                      | -.000114279329        | .000183039479 | 1.000 | -.00068655954           | .00045800088  |
|                                       | Ventral Attention                     | -.000265572671        | .000204614044 | .990  | -.00090738489           | .00037623955  |

|                   |                   |                 |               |       |               |               |
|-------------------|-------------------|-----------------|---------------|-------|---------------|---------------|
|                   | Limbic            | -.003608177454* | .000558878022 | <.001 | -.00547879930 | -.00173755561 |
|                   | Fronto-parietal   | -.000707080916* | .000176474844 | .003  | -.00125638535 | -.00015777648 |
|                   | Default Mode      | -.000991765042* | .000179695159 | <.001 | -.00154558841 | -.00043794167 |
| Dorsal Attention  | Visual            | .000460281011   | .000215938467 | .531  | -.00021077577 | .00113133779  |
|                   | Somatomotor       | .000114279329   | .000183039479 | 1.000 | -.00045800088 | .00068655954  |
|                   | Ventral Attention | -.000151293342  | .000235046828 | 1.000 | -.00088452883 | .00058194214  |
|                   | Limbic            | -.003493898125* | .000570723004 | <.001 | -.00538895108 | -.00159884517 |
|                   | Fronto-parietal   | -.000592801587  | .000211005865 | .119  | -.00124992760 | .00006432442  |
|                   | Default Mode      | -.000877485713* | .000213706468 | .002  | -.00153945316 | -.00021551827 |
| Ventral Attention | Visual            | .000611574354   | .000234505602 | .199  | -.00011812483 | .00134127354  |
|                   | Somatomotor       | .000265572671   | .000204614044 | .990  | -.00037623955 | .00090738489  |
|                   | Dorsal Attention  | .000151293342   | .000235046828 | 1.000 | -.00058194214 | .00088452883  |
|                   | Limbic            | -.003342604783* | .000578003637 | <.001 | -.00525334945 | -.00143186011 |
|                   | Fronto-parietal   | -.000441508245  | .000229971588 | .715  | -.00115848538 | .00027546889  |
|                   | Default Mode      | -.000726192371* | .000232451954 | .047  | -.00144795656 | -.00000442818 |
| Limbic            | Visual            | .003954179137*  | .000570500319 | <.001 | .00205974471  | .00584861356  |
|                   | Somatomotor       | .003608177454*  | .000558878022 | <.001 | .00173755561  | .00547879930  |
|                   | Dorsal Attention  | .003493898125*  | .000570723004 | <.001 | .00159884517  | .00538895108  |
|                   | Ventral Attention | .003342604783*  | .000578003637 | <.001 | .00143186011  | .00525334945  |
|                   | Fronto-parietal   | .002901096538*  | .000568651622 | <.001 | .00101047472  | .00479171835  |
|                   | Default Mode      | .002616412412*  | .000569659238 | .002  | .00072388126  | .00450894356  |
| Fronto-parietal   | Visual            | .001053082598*  | .000210402807 | <.001 | .00040044768  | .00170571752  |
|                   | Somatomotor       | .000707080916*  | .000176474844 | .003  | .00015777648  | .00125638535  |
|                   | Dorsal Attention  | .000592801587   | .000211005865 | .119  | -.00006432442 | .00124992760  |
|                   | Ventral Attention | .000441508245   | .000229971588 | .715  | -.00027546889 | .00115848538  |
|                   | Limbic            | -.002901096538* | .000568651622 | <.001 | -.00479171835 | -.00101047472 |
|                   | Default Mode      | -.000284684126  | .000208111447 | .982  | -.00092779613 | .00035842788  |
| Default Mode      | Visual            | .001337766725*  | .000213111053 | <.001 | .00068016875  | .00199536470  |
|                   | Somatomotor       | .000991765042*  | .000179695159 | <.001 | .00043794167  | .00154558841  |
|                   | Dorsal Attention  | .000877485713*  | .000213706468 | .002  | .00021551827  | .00153945316  |
|                   | Ventral Attention | .000726192371*  | .000232451954 | .047  | .00000442818  | .00144795656  |
|                   | Limbic            | -.002616412412* | .000569659238 | .002  | -.00450894356 | -.00072388126 |
|                   | Fronto-parietal   | .000284684126   | .000208111447 | .982  | -.00035842788 | .00092779613  |

\*. The mean difference is significant at the 0.05 level.

**Supplemental Table 3: Mean differences in temporal structure-function coupling variance across the 7 resting-state functional networks.** One-way ANOVA table with post-hoc correction for multiple comparisons (Tamhane's T2 – equal variances not assumed); Dependent variable: Temporal structure-function coupling variance; factor:

Resting-state functional networks. Data derived from the 100 unrelated HCP subjects, analyzed using the Schaefer 400 atlas.

## Supplemental Table 4

### Multiple Comparisons

Dependent Variable: Temporal Structure-Function Coupling Variance

Test: Tamhane

| (I) Cyto-architectonic classes | (J) Cyto-architectonic classes | Mean Difference (I-J) | Std. Error    | Sig.  | 95% Confidence Interval |               |
|--------------------------------|--------------------------------|-----------------------|---------------|-------|-------------------------|---------------|
|                                |                                |                       |               |       | Lower Bound             | Upper Bound   |
| Agranular                      | Frontal                        | -.000352641780        | .000167603665 | .316  | -.00082980057           | .00012451701  |
|                                | Parietal                       | .000267611133         | .000192783665 | .839  | -.00027967034           | .00081489261  |
|                                | Polar                          | -.003862034080*       | .000611605373 | <.001 | -.00574137685           | -.00198269131 |
|                                | Granular                       | -.000051966217        | .000284881892 | 1.000 | -.00090557720           | .00080164476  |
| Frontal                        | Agranular                      | .000352641780         | .000167603665 | .316  | -.00012451701           | .00082980057  |
|                                | Parietal                       | .000620252914*        | .000153213021 | <.001 | .00018565300            | .00105485283  |
|                                | Polar                          | -.003509392299*       | .000600308105 | <.001 | -.00536772851           | -.00165105609 |
|                                | Granular                       | .000300675564         | .000259742912 | .950  | -.00050032165           | .00110167278  |
| Parietal                       | Agranular                      | -.000267611133        | .000192783665 | .839  | -.00081489261           | .00027967034  |
|                                | Frontal                        | -.000620252914*       | .000153213021 | <.001 | -.00105485283           | -.00018565300 |
|                                | Polar                          | -.004129645213*       | .000607819360 | <.001 | -.00600181470           | -.00225747572 |
|                                | Granular                       | -.000319577350        | .000276660322 | .949  | -.00115489925           | .00051574455  |
| Polar                          | Agranular                      | .003862034080*        | .000611605373 | <.001 | .00198269131            | .00574137685  |
|                                | Frontal                        | .003509392299*        | .000600308105 | <.001 | .00165105609            | .00536772851  |
|                                | Parietal                       | .004129645213*        | .000607819360 | <.001 | .00225747572            | .00600181470  |
|                                | Granular                       | .003810067863*        | .000642990299 | <.001 | .00186342655            | .00575670917  |
| Granular                       | Agranular                      | .000051966217         | .000284881892 | 1.000 | -.00080164476           | .00090557720  |
|                                | Frontal                        | -.000300675564        | .000259742912 | .950  | -.00110167278           | .00050032165  |
|                                | Parietal                       | .000319577350         | .000276660322 | .949  | -.00051574455           | .00115489925  |
|                                | Polar                          | -.003810067863*       | .000642990299 | <.001 | -.00575670917           | -.00186342655 |

\*. The mean difference is significant at the 0.05 level.

**Supplemental Table 4: Mean differences in temporal structure-function coupling variance across the 5 von-Economo/Koskinas-inspired cyto-architectonic classes.** One-way ANOVA table with post-hoc correction for multiple comparisons (Tamhane's T2 – equal variances not assumed): Dependent variable: Temporal structure-function coupling variance; factor: Cyto-architectonic classes. Data derived from the 100 unrelated HCP subjects, analyzed using the Schaefer 400 atlas.

## Supplemental Table 5

### Multiple Comparisons

Dependent Variable: Structure-Function Coupling

Test: Tamhane

| (I) Resting-state<br>functional networks | (J) Resting-state<br>functional networks | Mean Difference<br>(I-J) | Std. Error    | Sig.  | 95% Confidence Interval |               |
|------------------------------------------|------------------------------------------|--------------------------|---------------|-------|-------------------------|---------------|
|                                          |                                          |                          |               |       | Lower Bound             | Upper Bound   |
| Visual                                   | Somatomotor                              | .009107576726            | .011230708177 | 1.000 | -.02573808010           | .04395323355  |
|                                          | Dorsal Attention                         | .086044397800*           | .013397380051 | <.001 | .04424797363            | .12784082197  |
|                                          | Ventral Attention                        | .111751436338*           | .010984567983 | .000  | .07763090343            | .14587196924  |
|                                          | Limbic                                   | .180775407291*           | .016196657279 | <.001 | .12881725874            | .23273355584  |
|                                          | Fronto-parietal                          | .095090988743*           | .013071994472 | <.001 | .05435825706            | .13582372043  |
|                                          | Default Mode                             | .082620982778*           | .010883044118 | <.001 | .04894521263            | .11629675293  |
| Somatomotor                              | Visual                                   | -.009107576726           | .011230708177 | 1.000 | -.04395323355           | .02573808010  |
|                                          | Dorsal Attention                         | .076936821074*           | .012828046023 | <.001 | .03679531009            | .11707833206  |
|                                          | Ventral Attention                        | .102643859612*           | .010282495141 | <.001 | .07065946383            | .13462825539  |
|                                          | Limbic                                   | .171667830565*           | .015728975795 | <.001 | .12090140788            | .22243425326  |
|                                          | Fronto-parietal                          | .085983412017*           | .012487834561 | <.001 | .04696119716            | .12500562687  |
|                                          | Default Mode                             | .073513406052*           | .010173967850 | <.001 | .04202814245            | .10499866965  |
| Dorsal Attention                         | Visual                                   | -.086044397800*          | .013397380051 | <.001 | -.12784082197           | -.04424797363 |
|                                          | Somatomotor                              | -.076936821074*          | .012828046023 | <.001 | -.11707833206           | -.03679531009 |
|                                          | Ventral Attention                        | .025707038538            | .012613115887 | .620  | -.01382703794           | .06524111502  |
|                                          | Limbic                                   | .094731009492*           | .017342481530 | <.001 | .03955536726            | .14990665172  |
|                                          | Fronto-parietal                          | .009046590943            | .014467446150 | 1.000 | -.03612277475           | .05421595664  |
|                                          | Default Mode                             | -.003423415022           | .012524799714 | 1.000 | -.04261113705           | .03576430701  |
| Ventral Attention                        | Visual                                   | -.111751436338*          | .010984567983 | .000  | -.14587196924           | -.07763090343 |
|                                          | Somatomotor                              | -.102643859612*          | .010282495141 | <.001 | -.13462825539           | -.07065946383 |
|                                          | Dorsal Attention                         | -.025707038538           | .012613115887 | .620  | -.06524111502           | .01382703794  |
|                                          | Limbic                                   | .069023970954*           | .015554182948 | .001  | .01868704144            | .11936090047  |
|                                          | Fronto-parietal                          | -.016660447594           | .012266945001 | .984  | -.05505389272           | .02173299753  |
|                                          | Default Mode                             | -.029130453560           | .009901593278 | .079  | -.05979745603           | .00153654891  |
| Limbic                                   | Visual                                   | -.180775407291*          | .016196657279 | <.001 | -.23273355584           | -.12881725874 |
|                                          | Somatomotor                              | -.171667830565*          | .015728975795 | <.001 | -.22243425326           | -.12090140788 |
|                                          | Dorsal Attention                         | -.094731009492*          | .017342481530 | <.001 | -.14990665172           | -.03955536726 |
|                                          | Ventral Attention                        | -.069023970954*          | .015554182948 | .001  | -.11936090047           | -.01868704144 |
|                                          | Fronto-parietal                          | -.085684418548*          | .017092364169 | <.001 | -.14014578493           | -.03122305217 |
|                                          | Default Mode                             | -.098154424513*          | .015482652314 | <.001 | -.14826223139           | -.04804661764 |
| Fronto-parietal                          | Visual                                   | -.095090988743*          | .013071994472 | <.001 | -.13582372043           | -.05435825706 |
|                                          | Somatomotor                              | -.085983412017*          | .012487834561 | <.001 | -.12500562687           | -.04696119716 |

|              |                   |                 |               |       |               |               |
|--------------|-------------------|-----------------|---------------|-------|---------------|---------------|
|              | Dorsal Attention  | -.009046590943  | .014467446150 | 1.000 | -.05421595664 | .03612277475  |
|              | Ventral Attention | .016660447594   | .012266945001 | .984  | -.02173299753 | .05505389272  |
|              | Limbic            | .085684418548*  | .017092364169 | <.001 | .03122305217  | .14014578493  |
|              | Default Mode      | -.012470005965  | .012176118230 | 1.000 | -.05049979794 | .02555978601  |
| Default Mode | Visual            | -.082620982778* | .010883044118 | <.001 | -.11629675293 | -.04894521263 |
|              | Somatomotor       | -.073513406052* | .010173967850 | <.001 | -.10499866965 | -.04202814245 |
|              | Dorsal Attention  | .003423415022   | .012524799714 | 1.000 | -.03576430701 | .04261113705  |
|              | Ventral Attention | .029130453560   | .009901593278 | .079  | -.00153654891 | .05979745603  |
|              | Limbic            | .098154424513*  | .015482652314 | <.001 | .04804661764  | .14826223139  |
|              | Fronto-parietal   | .012470005965   | .012176118230 | 1.000 | -.02555978601 | .05049979794  |

\*. The mean difference is significant at the 0.05 level.

**Supplemental Table 5: Mean differences in structure-function coupling across the 7 resting-state functional networks.** One-way ANOVA table with post-hoc correction for multiple comparisons (Tamhane's T2 – equal variances not assumed): Dependent variable: Structure-function coupling; factor: Resting-state functional networks. Data derived from the 100 unrelated HCP subjects, analyzed using the HCP multi-modal atlas.

## Supplemental Table 6

### Multiple Comparisons

Dependent Variable: Structure-Function Coupling

Test: Tamhane

| (I) Cyto-architectonic classes | (J) Cyto-architectonic classes | Mean Difference (I-J) | Std. Error    | Sig.  | 95% Confidence Interval |               |
|--------------------------------|--------------------------------|-----------------------|---------------|-------|-------------------------|---------------|
|                                |                                |                       |               |       | Lower Bound             | Upper Bound   |
| Agranular                      | Frontal                        | -.030215803408*       | .010382118814 | .042  | -.05984410357           | -.00058750325 |
|                                | Parietal                       | -.076467057724*       | .012147499886 | <.001 | -.11099675238           | -.04193736307 |
|                                | Polar                          | .047520300764         | .018918155080 | .155  | -.00897703122           | .10401763275  |
|                                | Granular                       | -.084260914284*       | .019192452563 | .001  | -.14247940850           | -.02604242007 |
| Frontal                        | Agranular                      | .030215803408*        | .010382118814 | .042  | .00058750325            | .05984410357  |
|                                | Parietal                       | -.046251254316*       | .009925432749 | <.001 | -.07442092933           | -.01808157930 |
|                                | Polar                          | .077736104172*        | .017574101781 | .001  | .02415386721            | .13131834114  |
|                                | Granular                       | -.054045110876        | .017869042984 | .061  | -.10965396028           | .00156373853  |
| Parietal                       | Agranular                      | .076467057724*        | .012147499886 | <.001 | .04193736307            | .11099675238  |
|                                | Frontal                        | .046251254316*        | .009925432749 | <.001 | .01808157930            | .07442092933  |
|                                | Polar                          | .123987358488*        | .018671433148 | <.001 | .06807016396            | .17990455302  |
|                                | Granular                       | -.007793856560        | .018949302351 | 1.000 | -.06548221715           | .04989450403  |
| Polar                          | Agranular                      | -.047520300764        | .018918155080 | .155  | -.10401763275           | .00897703122  |
|                                | Frontal                        | -.077736104172*       | .017574101781 | .001  | -.13131834114           | -.02415386721 |
|                                | Parietal                       | -.123987358488*       | .018671433148 | <.001 | -.17990455302           | -.06807016396 |

|          |           |                 |               |       |               |               |
|----------|-----------|-----------------|---------------|-------|---------------|---------------|
|          | Granular  | -.131781215048* | .023862332194 | <.001 | -.20253196245 | -.06103046765 |
| Granular | Agranular | .084260914284*  | .019192452563 | .001  | .02604242007  | .14247940850  |
|          | Frontal   | .054045110876   | .017869042984 | .061  | -.00156373853 | .10965396028  |
|          | Parietal  | .007793856560   | .018949302351 | 1.000 | -.04989450403 | .06548221715  |
|          | Polar     | .131781215048*  | .023862332194 | <.001 | .06103046765  | .20253196245  |

\*. The mean difference is significant at the 0.05 level.

**Supplemental Table 6: Mean differences in structure-function coupling across the 5 von-Economo/Koskinas-inspired cyto-architectonic classes.** One-way ANOVA table with post-hoc correction for multiple comparisons (Tamhane's T2 – equal variances not assumed): Dependent variable: Structure-function coupling; factor: Cyto-architectonic classes. Data derived from the 100 unrelated HCP subjects, analyzed using the HCP multi-modal atlas.

## Supplemental Table 7

### Multiple Comparisons

Dependent Variable: Temporal Structure-Function Coupling Variance

Test: Tamhane

| (I) Resting-state functional networks | (J) Resting-state functional networks | Mean Difference (I-J) | Std. Error    | Sig.  | 95% Confidence Interval<br>Lower Bound Upper Bound |               |
|---------------------------------------|---------------------------------------|-----------------------|---------------|-------|----------------------------------------------------|---------------|
| Visual                                | Somatomotor                           | -.000181527307        | .000285953066 | 1.000 | -.00106999004                                      | .00070693543  |
|                                       | Dorsal Attention                      | -.000194390164        | .000267296838 | 1.000 | -.00102654309                                      | .00063776276  |
|                                       | Ventral Attention                     | -.000669260306        | .000269344466 | .266  | -.00150664247                                      | .00016812185  |
|                                       | Limbic                                | -.003945006637*       | .000627551576 | <.001 | -.00601663082                                      | -.00187338245 |
|                                       | Fronto-parietal                       | -.001152118296*       | .000257475436 | <.001 | -.00195283400                                      | -.00035140259 |
|                                       | Default Mode                          | -.001857336619*       | .000307249163 | <.001 | -.00280591357                                      | -.00090875966 |
| Somatomotor                           | Visual                                | .000181527307         | .000285953066 | 1.000 | -.00070693543                                      | .00106999004  |
|                                       | Dorsal Attention                      | -.000012862857        | .000295738165 | 1.000 | -.00093380899                                      | .00090808327  |
|                                       | Ventral Attention                     | -.000487732999        | .000297590161 | .901  | -.00141347742                                      | .00043801142  |
|                                       | Limbic                                | -.003763479330*       | .000640183133 | <.001 | -.00586350459                                      | -.00166345406 |
|                                       | Fronto-parietal                       | -.000970590989*       | .000286892075 | .022  | -.00186398885                                      | -.00007719313 |
|                                       | Default Mode                          | -.001675809311*       | .000332288294 | <.001 | -.00270249307                                      | -.00064912555 |
| Dorsal Attention                      | Visual                                | .000194390164         | .000267296838 | 1.000 | -.00063776276                                      | .00102654309  |
|                                       | Somatomotor                           | .000012862857         | .000295738165 | 1.000 | -.00090808327                                      | .00093380899  |
|                                       | Ventral Attention                     | -.000474870142        | .000279711186 | .871  | -.00134724578                                      | .00039750550  |
|                                       | Limbic                                | -.003750616473*       | .000632070318 | <.001 | -.00583251891                                      | -.00166871404 |
|                                       | Fronto-parietal                       | -.000957728132*       | .000268301148 | .012  | -.00179550525                                      | -.00011995102 |
|                                       | Default Mode                          | -.001662946455*       | .000316376286 | <.001 | -.00264171672                                      | -.00068417619 |
| Ventral Attention                     | Visual                                | .000669260306         | .000269344466 | .266  | -.00016812185                                      | .00150664247  |
|                                       | Somatomotor                           | .000487732999         | .000297590161 | .901  | -.00043801142                                      | .00141347742  |



|                 |                   |                 |               |       |               |               |
|-----------------|-------------------|-----------------|---------------|-------|---------------|---------------|
|                 | Dorsal Attention  | .000474870142   | .000279711186 | .871  | -.00039750550 | .00134724578  |
|                 | Limbic            | -.003275746331* | .000632938961 | <.001 | -.00535948880 | -.00119200386 |
|                 | Fronto-parietal   | -.000482857990  | .000270341170 | .816  | -.00132578593 | .00036006995  |
|                 | Default Mode      | -.001188076313* | .000318108151 | .006  | -.00217148662 | -.00020466601 |
| Limbic          | Visual            | .003945006637*  | .000627551576 | <.001 | .00187338245  | .00601663082  |
|                 | Somatomotor       | .003763479330*  | .000640183133 | <.001 | .00166345406  | .00586350459  |
|                 | Dorsal Attention  | .003750616473*  | .000632070318 | <.001 | .00166871404  | .00583251891  |
|                 | Ventral Attention | .003275746331*  | .000632938961 | <.001 | .00119200386  | .00535948880  |
|                 | Fronto-parietal   | .002792888341*  | .000627980006 | .002  | .00072010438  | .00486567230  |
|                 | Default Mode      | .002087670019   | .000649974873 | .057  | -.00003425157 | .00420959160  |
| Fronto-parietal | Visual            | .001152118296*  | .000257475436 | <.001 | .00035140259  | .00195283400  |
|                 | Somatomotor       | .000970590989*  | .000286892075 | .022  | .00007719313  | .00186398885  |
|                 | Dorsal Attention  | .000957728132*  | .000268301148 | .012  | .00011995102  | .00179550525  |
|                 | Ventral Attention | .000482857990   | .000270341170 | .816  | -.00036006995 | .00132578593  |
|                 | Limbic            | -.002792888341* | .000627980006 | .002  | -.00486567230 | -.00072010438 |
|                 | Default Mode      | -.000705218322  | .000308123279 | .396  | -.00165813552 | .00024769887  |
| Default Mode    | Visual            | .001857336619*  | .000307249163 | <.001 | .00090875966  | .00280591357  |
|                 | Somatomotor       | .001675809311*  | .000332288294 | <.001 | .00064912555  | .00270249307  |
|                 | Dorsal Attention  | .001662946455*  | .000316376286 | <.001 | .00068417619  | .00264171672  |
|                 | Ventral Attention | .001188076313*  | .000318108151 | .006  | .00020466601  | .00217148662  |
|                 | Limbic            | -.002087670019  | .000649974873 | .057  | -.00420959160 | .00003425157  |
|                 | Fronto-parietal   | .000705218322   | .000308123279 | .396  | -.00024769887 | .00165813552  |

\*. The mean difference is significant at the 0.05 level.

**Supplemental Table 7: Mean differences in temporal structure-function coupling variance across the 7 resting-state functional networks.** One-way ANOVA table with post-hoc correction for multiple comparisons (Tamhane's T2 – equal variances not assumed): Dependent variable: Temporal structure-function coupling variance; factor: Resting-state functional networks. Data derived from the 100 unrelated HCP subjects, analyzed using the HCP multi-modal atlas.

## Supplemental Table 8

### Multiple Comparisons

Dependent Variable: Temporal Structure-Function Coupling Variance

Test: Tamhane

| (I) Cyto-architectonic classes | (J) Cyto-architectonic classes | Mean Difference (I-J) | Std. Error    | Sig.  | 95% Confidence Interval |              |
|--------------------------------|--------------------------------|-----------------------|---------------|-------|-------------------------|--------------|
|                                |                                |                       |               |       | Lower Bound             | Upper Bound  |
| Agranular                      | Frontal                        | .000165235911         | .000267496654 | 1.000 | -.00059854874           | .00092902057 |
|                                | Parietal                       | .000676981514         | .000276581826 | .148  | -.00011204710           | .00146601012 |

|          |           |                 |               |       |               |               |
|----------|-----------|-----------------|---------------|-------|---------------|---------------|
|          | Polar     | -.004328708186* | .000551685657 | <.001 | -.00598795923 | -.00266945715 |
|          | Granular  | .000469761938   | .000515137830 | .990  | -.00109691157 | .00203643544  |
| Frontal  | Agranular | -.000165235911  | .000267496654 | 1.000 | -.00092902057 | .00059854874  |
|          | Parietal  | .000511745602   | .000205363784 | .127  | -.00006928745 | .00109277865  |
|          | Polar     | -.004493944097* | .000519647805 | <.001 | -.00608644297 | -.00290144522 |
|          | Granular  | .000304526026   | .000480670116 | 1.000 | -.00119546442 | .00180451647  |
| Parietal | Agranular | -.000676981514  | .000276581826 | .148  | -.00146601012 | .00011204710  |
|          | Frontal   | -.000511745602  | .000205363784 | .127  | -.00109277865 | .00006928745  |
|          | Polar     | -.005005689700* | .000524382387 | <.001 | -.00660755525 | -.00340382415 |
|          | Granular  | -.000207219576  | .000485784734 | 1.000 | -.00171635160 | .00130191245  |
| Polar    | Agranular | .004328708186*  | .000551685657 | <.001 | .00266945715  | .00598795923  |
|          | Frontal   | .004493944097*  | .000519647805 | <.001 | .00290144522  | .00608644297  |
|          | Parietal  | .005005689700*  | .000524382387 | <.001 | .00340382415  | .00660755525  |
|          | Granular  | .004798470124*  | .000681062673 | <.001 | .00278077369  | .00681616656  |
| Granular | Agranular | -.000469761938  | .000515137830 | .990  | -.00203643544 | .00109691157  |
|          | Frontal   | -.000304526026  | .000480670116 | 1.000 | -.00180451647 | .00119546442  |
|          | Parietal  | .000207219576   | .000485784734 | 1.000 | -.00130191245 | .00171635160  |
|          | Polar     | -.004798470124* | .000681062673 | <.001 | -.00681616656 | -.00278077369 |

\*. The mean difference is significant at the 0.05 level.

**Supplemental Table 8: Mean differences in temporal structure-function coupling variance across the 5 non-Economu/Koskinas-inspired cyto-architectonic classes.** One-way ANOVA table with post-hoc correction for multiple comparisons (Tamhane's T2 – equal variances not assumed): Dependent variable: Temporal structure-function coupling variance; factor: Cyto-architectonic classes. Data derived from the 100 unrelated HCP subjects, analyzed using the HCP multi-modal atlas.

**Supplemental Table 9**

| A. Structure-Function Coupling |                      |                  |                               |                 |                |                               |      |
|--------------------------------|----------------------|------------------|-------------------------------|-----------------|----------------|-------------------------------|------|
| Cortical Type                  | Intracortical Myelin |                  |                               | Hurst Exponent  |                |                               | VIF  |
|                                | $\beta_{stand}$      | 95% BCI          | Bootstrapped $p$ -value (FDR) | $\beta_{stand}$ | 95% BCI        | Bootstrapped $p$ -value (FDR) |      |
| Granular                       | 0.349                | [0.344, 0.352]   | 0.075                         | 0.502           | [0.516, 0.525] | 0.013                         | 1.01 |
| Polar                          | -0.395               | [-0.402, -0.397] | 0.017                         | 0.225           | [0.206, 0.213] | 0.239                         | 1.04 |
| Parietal                       | 0.411                | [0.417, 0.421]   | <10 <sup>-4</sup>             | 0.385           | [0.377, 0.380] | 0.004                         | 1.01 |

|                                                         |                             |                  |                                    |                       |                  |                                    |            |
|---------------------------------------------------------|-----------------------------|------------------|------------------------------------|-----------------------|------------------|------------------------------------|------------|
| Frontal                                                 | 0.404                       | [0.403, 0.407]   | <10 <sup>-4</sup>                  | 0.273                 | [0.269, 0.273]   | 0.006                              | 1.08       |
| Agranular                                               | 0.484                       | [0.472, 0.477]   | 0.003                              | 0.017                 | [0.006, 0.011]   | 0.922                              | 1.33       |
| <b>B. Temporal Structure-Function Coupling Variance</b> |                             |                  |                                    |                       |                  |                                    |            |
|                                                         | <b>Intracortical Myelin</b> |                  |                                    | <b>Hurst Exponent</b> |                  |                                    |            |
| <b>Cortical Type</b>                                    | $\beta_{stand}$             | 95% <i>BCI</i>   | Bootstrapped <i>p</i> -value (FDR) | $\beta_{stand}$       | 95% <i>BCI</i>   | Bootstrapped <i>p</i> -value (FDR) | <i>VIF</i> |
| Granular                                                | -0.111                      | [-0.111, -0.106] | 0.625                              | -0.866                | [-0.870, -0.865] | <10 <sup>-4</sup>                  | 1.01       |
| Polar                                                   | 0.000                       | [-0.007, 0.002]  | 0.942                              | -0.488                | [-0.504, -0.495] | 0.032                              | 1.04       |
| Parietal                                                | -0.321                      | [-0.318, -0.315] | 0.001                              | -0.690                | [-0.694, -0.691] | <10 <sup>-4</sup>                  | 1.01       |
| Frontal                                                 | -0.168                      | [-0.169, -0.166] | 0.035                              | -0.405                | [-0.405, -0.401] | <10 <sup>-4</sup>                  | 1.08       |
| Agranular                                               | 0.015                       | [0.017, 0.021]   | 0.942                              | -0.698                | [-0.703, -0.698] | <10 <sup>-4</sup>                  | 1.33       |

**Supplemental Table 9: Atlas-based multiple linear regression analyses** – Results corresponding to the atlas-based (HCP multi-modal cortical parcellation) analyses discussed in section: ‘Biological Correlates of Structure-Function Coupling: Regional perspective’ of our **Supplementary Analysis 1** section above.  $\beta_{stand}$ : standardized  $\beta$  coefficient; 95% *BCI*: 95% bootstrapped standardized  $\beta$  coefficient confidence interval; Bootstrapped *p*-value (FDR): bootstrapped *p*-value adjusted for multiple comparisons (two-tailed test; false discovery rate: Benjamini-Hochberg method); *VIF*: Variance Inflation Factor.

## Supplemental Table 10

### Multiple Comparisons

Dependent Variable: Structure-Function Coupling

Test: Tamhane

| (I) Resting-state functional networks | (J) Resting-state functional networks | Mean Difference (I-J) | Std. Error       | Sig.  | 95% Confidence Interval |                  |
|---------------------------------------|---------------------------------------|-----------------------|------------------|-------|-------------------------|------------------|
|                                       |                                       |                       |                  |       | Lower Bound             | Upper Bound      |
| Visual                                | Somatomotor                           | .011576259845075      | .011012956877614 | .999  | -.022444447855747       | .045596967545897 |
|                                       | Dorsal Attention                      | .078762503502432*     | .013690348546591 | <.001 | .035968531348661        | .121556475656204 |
|                                       | Ventral Attention                     | .118368833753839*     | .012161435860379 | <.001 | .080508179813655        | .156229487694023 |
|                                       | Limbic                                | .128119853216785*     | .017555886632451 | <.001 | .071077052959085        | .185162653474485 |
|                                       | Fronto-parietal                       | .091376027389999*     | .012321795324671 | <.001 | .053080595024469        | .129671459755530 |
|                                       | Default Mode                          | .065777050011911*     | .009769426719259 | <.001 | .035544696323115        | .096009403700707 |

|                   |                   |                    |                  |       |                   |                   |
|-------------------|-------------------|--------------------|------------------|-------|-------------------|-------------------|
| Somatomotor       | Visual            | -.011576259845075  | .011012956877614 | .999  | -.045596967545897 | .022444447855747  |
|                   | Dorsal Attention  | .067186243657357*  | .013738242238796 | <.001 | .024294299424314  | .110078187890401  |
|                   | Ventral Attention | .106792573908764*  | .012215325565485 | <.001 | .068828955779320  | .144756192038208  |
|                   | Limbic            | .116543593371710*  | .017593260412332 | <.001 | .059430877784780  | .173656308958640  |
|                   | Fronto-parietal   | .079799767544924*  | .012374986727580 | <.001 | .041400518785368  | .118199016304480  |
|                   | Default Mode      | .054200790166836*  | .009836429987940 | <.001 | .023866709994600  | .084534870339071  |
| Dorsal Attention  | Visual            | -.078762503502432* | .013690348546591 | <.001 | -.121556475656204 | -.035968531348661 |
|                   | Somatomotor       | -.067186243657357* | .013738242238796 | <.001 | -.110078187890401 | -.024294299424314 |
|                   | Ventral Attention | .039606330251407   | .014674965172352 | .161  | -.006196449615785 | .085409110118598  |
|                   | Limbic            | .049357349714353   | .019382033847744 | .256  | -.012524703142798 | .111239402571503  |
|                   | Fronto-parietal   | .012613523887567   | .014808130221157 | 1.000 | -.033549539962456 | .058776587737590  |
|                   | Default Mode      | -.012985453490521  | .012763063074615 | 1.000 | -.053105658048820 | .027134751067777  |
| Ventral Attention | Visual            | -.118368833753839* | .012161435860379 | <.001 | -.156229487694023 | -.080508179813655 |
|                   | Somatomotor       | -.106792573908764* | .012215325565485 | <.001 | -.144756192038208 | -.068828955779320 |
|                   | Dorsal Attention  | -.039606330251407  | .014674965172352 | .161  | -.085409110118598 | .006196449615785  |
|                   | Limbic            | .009751019462946   | .018334069786440 | 1.000 | -.049298806097523 | .068800845023415  |
|                   | Fronto-parietal   | -.026992806363840  | .013407296502490 | .635  | -.068720703328100 | .014735090600420  |
|                   | Default Mode      | -.052591783741928* | .011107234485036 | <.001 | -.087309135730714 | -.017874431753142 |
| Limbic            | Visual            | -.128119853216785* | .017555886632451 | <.001 | -.185162653474485 | -.071077052959085 |
|                   | Somatomotor       | -.116543593371710* | .017593260412332 | <.001 | -.173656308958640 | -.059430877784780 |
|                   | Dorsal Attention  | -.049357349714353  | .019382033847744 | .256  | -.111239402571503 | .012524703142798  |
|                   | Ventral Attention | -.009751019462946  | .018334069786440 | 1.000 | -.068800845023415 | .049298806097523  |
|                   | Fronto-parietal   | -.036743825826786  | .018440830587884 | .678  | -.096049043524106 | .022561391870535  |
|                   | Default Mode      | -.062342803204874* | .016842781574637 | .016  | -.117697126604428 | -.006988479805320 |
| Fronto-parietal   | Visual            | -.091376027389999* | .012321795324671 | <.001 | -.129671459755530 | -.053080595024469 |
|                   | Somatomotor       | -.079799767544924* | .012374986727580 | <.001 | -.118199016304480 | -.041400518785368 |
|                   | Dorsal Attention  | -.012613523887567  | .014808130221157 | 1.000 | -.058776587737590 | .033549539962456  |
|                   | Ventral Attention | .026992806363840   | .013407296502490 | .635  | -.014735090600420 | .068720703328100  |
|                   | Limbic            | .036743825826786   | .018440830587884 | .678  | -.022561391870535 | .096049043524106  |
|                   | Default Mode      | -.025598977378088  | .011282587280520 | .421  | -.060782735449272 | .009584780693095  |
| Default Mode      | Visual            | -.065777050011911* | .009769426719259 | <.001 | -.096009403700707 | -.035544696323115 |
|                   | Somatomotor       | -.054200790166836* | .009836429987940 | <.001 | -.084534870339071 | -.023866709994600 |
|                   | Dorsal Attention  | .012985453490521   | .012763063074615 | 1.000 | -.027134751067777 | .053105658048820  |
|                   | Ventral Attention | .052591783741928*  | .011107234485036 | <.001 | .017874431753142  | .087309135730714  |
|                   | Limbic            | .062342803204874*  | .016842781574637 | .016  | .006988479805320  | .117697126604428  |
|                   | Fronto-parietal   | .025598977378088   | .011282587280520 | .421  | -.009584780693095 | .060782735449272  |

\*. The mean difference is significant at the 0.05 level.

**Supplemental Table 10: Mean differences in structure-function coupling across the 7 resting-state functional networks.** One-way ANOVA table with post-hoc correction for multiple comparisons (Tamhane's T2 – equal variances not assumed): Dependent variable: Structure-function coupling; factor: Resting-state functional networks. Data derived from the 100 unrelated HCP subjects, analyzed using the Schaefer 400 atlas.

## Supplemental Table 11

### Multiple Comparisons

Dependent Variable: Structure-Function Coupling

Test: Tamhane

| (I) Cyto-architectonic classes | (J) Cyto-architectonic classes | Mean Difference (I-J) | Std. Error       | Sig.  | 95% Confidence Interval |                   |
|--------------------------------|--------------------------------|-----------------------|------------------|-------|-------------------------|-------------------|
|                                |                                |                       |                  |       | Lower Bound             | Upper Bound       |
| Agranular                      | Frontal                        | -.040761010523845*    | .009823451359097 | <.001 | -.068695243443140       | -.012826777604551 |
|                                | Parietal                       | -.069817062841319*    | .011092311905753 | <.001 | -.101304900166407       | -.038329225516231 |
|                                | Polar                          | .016041661242572      | .020855710069885 | .997  | -.046843672459354       | .078926994944498  |
|                                | Granular                       | -.118734629145401*    | .014489106713137 | <.001 | -.161682301873357       | -.075786956417445 |
| Frontal                        | Agranular                      | .040761010523845*     | .009823451359097 | <.001 | .012826777604551        | .068695243443140  |
|                                | Parietal                       | -.029056052317473*    | .009071485027428 | .016  | -.054766289625380       | -.003345815009567 |
|                                | Polar                          | .056802671766417      | .019854800419733 | .080  | -.004021710894420       | .117627054427254  |
|                                | Granular                       | -.077973618621556*    | .013007177654396 | <.001 | -.117592641564863       | -.038354595678248 |
| Parietal                       | Agranular                      | .069817062841319*     | .011092311905753 | <.001 | .038329225516231        | .101304900166407  |
|                                | Frontal                        | .029056052317473*     | .009071485027428 | .016  | .003345815009567        | .054766289625380  |
|                                | Polar                          | .085858724083890*     | .020512247232261 | .002  | .023705782176360        | .148011665991421  |
|                                | Granular                       | -.048917566304082*    | .013990205764855 | .013  | -.090683100456517       | -.007152032151647 |
| Polar                          | Agranular                      | -.016041661242572     | .020855710069885 | .997  | -.078926994944498       | .046843672459355  |
|                                | Frontal                        | -.056802671766417     | .019854800419733 | .080  | -.117627054427254       | .004021710894420  |
|                                | Parietal                       | -.085858724083890*    | .020512247232261 | .002  | -.148011665991421       | -.023705782176360 |
|                                | Granular                       | -.134776290387972*    | .022531025641270 | <.001 | -.201952385565034       | -.067600195210911 |
| Granular                       | Agranular                      | .118734629145401*     | .014489106713137 | <.001 | .075786956417445        | .161682301873357  |
|                                | Frontal                        | .077973618621556*     | .013007177654396 | <.001 | .038354595678248        | .117592641564863  |
|                                | Parietal                       | .048917566304082*     | .013990205764855 | .013  | .007152032151647        | .090683100456517  |
|                                | Polar                          | .134776290387972*     | .022531025641270 | <.001 | .067600195210911        | .201952385565034  |

\*. The mean difference is significant at the 0.05 level.

**Supplemental Table 11: Mean differences in structure-function coupling across the 5 von-Economo/Koskinas-inspired cyto-architectonic classes.** One-way ANOVA table with post-hoc correction for multiple comparisons (Tamhane's T2 – equal variances not assumed): Dependent variable: Structure-function coupling; factor: Cyto-architectonic classes. Data derived from the 100 unrelated HCP subjects, analyzed using the Schaefer 400 atlas.

## Supplemental Table 12

### Multiple Comparisons

Dependent Variable: Temporal Structure-Function Coupling Variance

Test: Tamhane

| (I) Resting-state<br>functional<br>networks | (J) Resting-state<br>functional<br>networks | Mean Difference<br>(I-J) | Std. Error       | Sig.  | 95% Confidence Interval |                   |
|---------------------------------------------|---------------------------------------------|--------------------------|------------------|-------|-------------------------|-------------------|
|                                             |                                             |                          |                  |       | Lower Bound             | Upper Bound       |
| Visual                                      | Somatomotor                                 | -.000417954355607        | .000154774488292 | .158  | -.000899728694584       | .000063819983371  |
|                                             | Dorsal Attention                            | .000041389264154         | .000177189191989 | 1.000 | -.000508946651812       | .000591725180121  |
|                                             | Ventral Attention                           | -.000097920589750        | .000224385624386 | 1.000 | -.000797604509343       | .000601763329843  |
|                                             | Limbic                                      | -.005542890908206*       | .001032068903494 | <.001 | -.009008512290002       | -.002077269526411 |
|                                             | Fronto-parietal                             | -.000411572760877        | .000206183589545 | .648  | -.001051869024890       | .000228723503135  |
|                                             | Default Mode                                | -.000794805647197*       | .000192588821376 | .001  | -.001388905098760       | -.000200706195633 |
| Somatomotor                                 | Visual                                      | .000417954355607         | .000154774488292 | .158  | -.000063819983371       | .000899728694584  |
|                                             | Dorsal Attention                            | .000459343619761*        | .000137748156739 | .026  | .000028762127004        | .000889925112518  |
|                                             | Ventral Attention                           | .000320033765856         | .000194749719790 | .903  | -.000295069975991       | .000935137507704  |
|                                             | Limbic                                      | -.005124936552600*       | .001026033511386 | <.001 | -.008578990223859       | -.001670882881341 |
|                                             | Fronto-parietal                             | .000006381594729         | .000173465320814 | 1.000 | -.000537712075290       | .000550475264749  |
|                                             | Default Mode                                | -.000376851291590        | .000157063678316 | .314  | -.000861799723140       | .000108097139960  |
| Dorsal Attention                            | Visual                                      | -.000041389264154        | .000177189191989 | 1.000 | -.000591725180121       | .000508946651812  |
|                                             | Somatomotor                                 | -.000459343619761*       | .000137748156739 | .026  | -.000889925112518       | -.000028762127004 |
|                                             | Ventral Attention                           | -.000139309853905        | .000212998405839 | 1.000 | -.000806550437732       | .000527930729923  |
|                                             | Limbic                                      | -.005584280172361*       | .001029653162001 | <.001 | -.009045251909679       | -.002123308435042 |
|                                             | Fronto-parietal                             | -.000452962025032        | .000193729411956 | .367  | -.001056963321183       | .000151039271119  |
|                                             | Default Mode                                | -.000836194911351*       | .000179192261490 | <.001 | -.001389993849054       | -.000282395973648 |
| Ventral Attention                           | Visual                                      | .000097920589750         | .000224385624386 | 1.000 | -.000601763329843       | .000797604509343  |
|                                             | Somatomotor                                 | -.000320033765856        | .000194749719790 | .903  | -.000935137507704       | .000295069975991  |
|                                             | Dorsal Attention                            | .000139309853905         | .000212998405839 | 1.000 | -.000527930729923       | .000806550437732  |
|                                             | Limbic                                      | -.005444970318456*       | .001038815928205 | <.001 | -.008923837663188       | -.001966102973724 |
|                                             | Fronto-parietal                             | -.000313652171127        | .000237663593615 | .988  | -.001054042778591       | .000426738436337  |
|                                             | Default Mode                                | -.000696885057446        | .000225970717685 | .054  | -.001399864524700       | .000006094409807  |
| Limbic                                      | Visual                                      | .005542890908206*        | .001032068903494 | <.001 | .002077269526411        | .009008512290002  |
|                                             | Somatomotor                                 | .005124936552600*        | .001026033511386 | <.001 | .001670882881341        | .008578990223859  |
|                                             | Dorsal Attention                            | .005584280172361*        | .001029653162001 | <.001 | .002123308435042        | .009045251909679  |
|                                             | Ventral Attention                           | .005444970318456*        | .001038815928205 | <.001 | .001966102973724        | .008923837663188  |
|                                             | Fronto-parietal                             | .005131318147329*        | .001035036857730 | <.001 | .001659909172183        | .008602727122475  |
|                                             | Default Mode                                | .004748085261010*        | .001032414683342 | .002  | .001281810846315        | .008214359675705  |

|                 |                   |                    |                  |       |                   |                   |
|-----------------|-------------------|--------------------|------------------|-------|-------------------|-------------------|
| Fronto-parietal | Visual            | .000411572760877   | .000206183589545 | .648  | -.000228723503135 | .001051869024890  |
|                 | Somatomotor       | -.000006381594729  | .000173465320814 | 1.000 | -.000550475264749 | .000537712075290  |
|                 | Dorsal Attention  | .000452962025032   | .000193729411956 | .367  | -.000151039271119 | .001056963321183  |
|                 | Ventral Attention | .000313652171127   | .000237663593615 | .988  | -.000426738436337 | .001054042778591  |
|                 | Limbic            | -.005131318147329* | .001035036857730 | <.001 | -.008602727122475 | -.001659909172183 |
|                 | Default Mode      | -.000383232886319  | .000207907502072 | .771  | -.001026981642974 | .000260515870336  |
| Default Mode    | Visual            | .000794805647197*  | .000192588821376 | .001  | .000200706195633  | .001388905098760  |
|                 | Somatomotor       | .000376851291590   | .000157063678316 | .314  | -.000108097139960 | .000861799723140  |
|                 | Dorsal Attention  | .000836194911351*  | .000179192261490 | <.001 | .000282395973648  | .001389993849054  |
|                 | Ventral Attention | .000696885057446   | .000225970717685 | .054  | -.000006094409807 | .001399864524700  |
|                 | Limbic            | -.004748085261010* | .001032414683342 | .002  | -.008214359675705 | -.001281810846315 |
|                 | Fronto-parietal   | .000383232886319   | .000207907502072 | .771  | -.000260515870336 | .001026981642974  |

\*. The mean difference is significant at the 0.05 level.

**Supplemental Table 12: Mean differences in temporal structure-function coupling variance across the 7 resting-state functional networks.** One-way ANOVA table with post-hoc correction for multiple comparisons (Tamhane's T2 – equal variances not assumed): Dependent variable: Temporal structure-function coupling variance; factor: Resting-state functional networks. Data derived from the 100 unrelated HCP subjects, analyzed using the Schaefer 400 atlas.

### Supplemental Table 13

#### Multiple Comparisons

Dependent Variable: Temporal Structure-Function Coupling Variance

Test: Tamhane

| (I) Cyto-architectonic classes | (J) Cyto-architectonic classes | Mean Difference (I-J) | Std. Error       | Sig.  | 95% Confidence Interval |                   |
|--------------------------------|--------------------------------|-----------------------|------------------|-------|-------------------------|-------------------|
|                                |                                |                       |                  |       | Lower Bound             | Upper Bound       |
| Agranular                      | Frontal                        | -.000144835313691     | .000232862287540 | 1.000 | -.000811675014589       | .000522004387207  |
|                                | Parietal                       | .000319984782868      | .000246927548193 | .889  | -.000384513851014       | .001024483416749  |
|                                | Polar                          | -.004950262754159*    | .001117304602086 | .002  | -.008395865122671       | -.001504660385646 |
|                                | Granular                       | -.000355775530766     | .000297647369246 | .932  | -.001217500451292       | .000505949389759  |
| Frontal                        | Agranular                      | .000144835313691      | .000232862287540 | 1.000 | -.000522004387207       | .000811675014589  |
|                                | Parietal                       | .000464820096559*     | .000140493767067 | .011  | .000066536816101        | .000863103377017  |
|                                | Polar                          | -.004805427440467*    | .001098696891035 | .002  | -.008217285007333       | -.001393569873602 |
|                                | Granular                       | -.000210940217075     | .000217621784174 | .985  | -.000877624317248       | .000455743883097  |
| Parietal                       | Agranular                      | -.000319984782868     | .000246927548193 | .889  | -.001024483416749       | .000384513851014  |
|                                | Frontal                        | -.000464820096559*    | .000140493767067 | .011  | -.000863103377017       | -.000066536816101 |
|                                | Polar                          | -.005270247537026*    | .001101763689485 | <.001 | -.008687546127957       | -.001852948946095 |
|                                | Granular                       | -.000675760313634     | .000232610425487 | .064  | -.001374068126620       | .000022547499352  |

|          |           |                    |                  |       |                   |                   |
|----------|-----------|--------------------|------------------|-------|-------------------|-------------------|
| Polar    | Agranular | .004950262754159*  | .001117304602086 | .002  | .001504660385646  | .008395865122671  |
|          | Frontal   | .004805427440467*  | .001098696891035 | .002  | .001393569873602  | .008217285007333  |
|          | Parietal  | .005270247537026*  | .001101763689485 | <.001 | .001852948946095  | .008687546127957  |
|          | Granular  | .004594487223392*  | .001114227970314 | .004  | .001154228370499  | .008034746076285  |
| Granular | Agranular | .000355775530766   | .000297647369246 | .932  | -.000505949389759 | .001217500451292  |
|          | Frontal   | .000210940217075   | .000217621784174 | .985  | -.000455743883097 | .000877624317248  |
|          | Parietal  | .000675760313634   | .000232610425487 | .064  | -.000022547499352 | .001374068126620  |
|          | Polar     | -.004594487223392* | .001114227970314 | .004  | -.008034746076285 | -.001154228370499 |

\*. The mean difference is significant at the 0.05 level.

**Supplemental Table 13: Mean differences in temporal structure-function coupling variance across the 5 von-Economo/Koskinas-inspired cyto-architectonic classes.** One-way ANOVA table with post-hoc correction for multiple comparisons (Tamhane's T2 – equal variances not assumed): Dependent variable: Temporal structure-function coupling variance; factor: Cyto-architectonic classes. Data derived from the 100 unrelated HCP subjects, analyzed using the Schaefer 400 atlas.

**Supplemental Table 14**

| <b>A. Structure-Function Coupling</b>                   |                             |                |                                    |                       |                  |                                    |            |
|---------------------------------------------------------|-----------------------------|----------------|------------------------------------|-----------------------|------------------|------------------------------------|------------|
|                                                         | <b>Intracortical Myelin</b> |                |                                    | <b>Hurst Exponent</b> |                  |                                    |            |
| <b>Cortical Type</b>                                    | $\beta_{stand}$             | 95% <i>BCI</i> | Bootstrapped <i>p</i> -value (FDR) | $\beta_{stand}$       | 95% <i>BCI</i>   | Bootstrapped <i>p</i> -value (FDR) | <i>VIF</i> |
| Granular                                                | 0.178                       | [0.131, 0.140] | 0.305                              | 0.704                 | [0.717, 0.723]   | $6.7 \times 10^{-4}$               | 1.01       |
| Polar                                                   | 0.303                       | [0.233, 0.244] | 0.305                              | -0.275                | [-0.264, -0.253] | 0.422                              | 1.04       |
| Parietal                                                | 0.416                       | [0.412, 0.415] | $<10^{-4}$                         | 0.538                 | [0.533, 0.536]   | $<10^{-4}$                         | 1.01       |
| Frontal                                                 | 0.437                       | [0.437, 0.439] | $<10^{-4}$                         | 0.275                 | [0.273, 0.276]   | $<10^{-4}$                         | 1.08       |
| Agranular                                               | 0.456                       | [0.456, 0.460] | $<10^{-4}$                         | 0.050                 | [0.055, 0.061]   | 0.712                              | 1.32       |
| <b>B. Temporal Structure-Function Coupling Variance</b> |                             |                |                                    |                       |                  |                                    |            |
|                                                         | <b>Intracortical Myelin</b> |                |                                    | <b>Hurst Exponent</b> |                  |                                    |            |
| <b>Cortical Type</b>                                    | $\beta_{stand}$             | 95% <i>BCI</i> | Bootstrapped <i>p</i> -value (FDR) | $\beta_{stand}$       | 95% <i>BCI</i>   | Bootstrapped <i>p</i> -value (FDR) | <i>VIF</i> |



|           |        |                  |       |        |                  |                   |      |
|-----------|--------|------------------|-------|--------|------------------|-------------------|------|
| Granular  | 0.326  | [0.285, 0.294]   | 0.209 | -0.462 | [-0.447, -0.440] | 0.020             | 1.01 |
| Polar     | -0.171 | [-0.177, -0.173] | 0.209 | -0.759 | [-0.752, -0.745] | <10 <sup>-4</sup> | 1.04 |
| Parietal  | -0.002 | [-0.001, 0.004]  | 0.999 | -0.433 | [-0.428, -0.423] | 0.006             | 1.01 |
| Frontal   | 0.024  | [0.024, 0.027]   | 0.846 | -0.428 | [-0.425, -0.422] | <10 <sup>-4</sup> | 1.08 |
| Agranular | -0.106 | [-0.102, -0.099] | 0.209 | -0.627 | [-0.612, -0.605] | <10 <sup>-4</sup> | 1.32 |

**Supplemental Table 14: Atlas-based multiple linear regression analyses** – Results corresponding to the atlas-based analyses discussed in section: ‘Biological Correlates of Structure-Function Coupling: Regional perspective’ of our **Supplementary Analysis 2A** section above.  $\beta_{stand}$ : standardized  $\beta$  coefficient; 95% *BCI*: 95% bootstrapped standardized  $\beta$  coefficient confidence interval; Bootstrapped *p*-value (FDR): bootstrapped *p*-value adjusted for multiple comparisons (two-tailed test; false discovery rate [FDR]: Benjamini-Hochberg method); *VIF*: Variance Inflation Factor.

## Supplemental Table 15

### Multiple Comparisons

Dependent Variable: Structure-Function Coupling

Test: Tamhane

| (I) Resting-state functional networks | (J) Resting-state functional networks | Mean Difference (I-J) | Std. Error       | Sig.  | 95% Confidence Interval |                   |
|---------------------------------------|---------------------------------------|-----------------------|------------------|-------|-------------------------|-------------------|
|                                       |                                       |                       |                  |       | Lower Bound             | Upper Bound       |
| Visual                                | Somatomotor                           | .006595690357668      | .011152932253749 | 1.000 | -.028005313256099       | .041196693971435  |
|                                       | Dorsal Attention                      | .089199981977586*     | .013443616348244 | <.001 | .047206436932407        | .131193527022764  |
|                                       | Ventral Attention                     | .115358404655630*     | .010886647680366 | .000  | .081545531250935        | .149171278060325  |
|                                       | Limbic                                | .173452816714172*     | .016575717428391 | <.001 | .120068621897863        | .226837011530481  |
|                                       | Fronto-parietal                       | .098206698052394*     | .013127895630619 | <.001 | .057252070748308        | .139161325356481  |
|                                       | Default Mode                          | .083421262434394*     | .010651487279391 | <.001 | .050477657593982        | .116364867274805  |
| Somatomotor                           | Visual                                | -.006595690357668     | .011152932253749 | 1.000 | -.041196693971435       | .028005313256099  |
|                                       | Dorsal Attention                      | .082604291619917*     | .013192885667825 | <.001 | .041321656829333        | .123886926410502  |
|                                       | Ventral Attention                     | .108762714297962*     | .010575467339176 | .000  | .075867006617745        | .141658421978178  |
|                                       | Limbic                                | .166857126356504*     | .016373021101538 | <.001 | .113974314455770        | .219739938257238  |
|                                       | Fronto-parietal                       | .091611007694726*     | .012871016098738 | <.001 | .051389358434193        | .131832656955260  |
|                                       | Default Mode                          | .076825572076725*     | .010333227617186 | <.001 | .044835858878752        | .108815285274699  |
| Dorsal Attention                      | Visual                                | -.089199981977585*    | .013443616348244 | <.001 | -.131193527022764       | -.047206436932407 |
|                                       | Somatomotor                           | -.082604291619917*    | .013192885667825 | <.001 | -.123886926410502       | -.041321656829333 |
|                                       | Ventral Attention                     | .026158422678044      | .01296855513396  | .638  | -.014489849006625       | .066806694362713  |

|                   |                   |                    |                  |       |                   |                   |
|-------------------|-------------------|--------------------|------------------|-------|-------------------|-------------------|
|                   | Limbic            | .084252834736587*  | .018011627984540 | <.001 | .026912628460240  | .141593041012933  |
|                   | Fronto-parietal   | .009006716074809   | .014899865035497 | 1.000 | -.037512243136162 | .055525675285780  |
|                   | Default Mode      | -.005778719543192  | .012771785922518 | 1.000 | -.045770053655846 | .034212614569463  |
| Ventral Attention | Visual            | -.115358404655630* | .010886647680366 | .000  | -.149171278060325 | -.081545531250935 |
|                   | Somatomotor       | -.108762714297962* | .010575467339176 | .000  | -.141658421978178 | -.075867006617745 |
|                   | Dorsal Attention  | -.026158422678044  | .012968555513396 | .638  | -.066806694362713 | .014489849006625  |
|                   | Limbic            | .058094412058542*  | .016192807658066 | .019  | .005652832643577  | .110535991473508  |
|                   | Fronto-parietal   | -.017151706603235  | .012640975250102 | .984  | -.056718410714937 | .022414997508466  |
|                   | Default Mode      | -.031937142221236* | .010045237321651 | .039  | -.063060640844704 | -.000813643597768 |
| Limbic            | Visual            | -.173452816714172* | .016575717428391 | <.001 | -.226837011530481 | -.120068621897863 |
|                   | Somatomotor       | -.166857126356504* | .016373021101538 | <.001 | -.219739938257238 | -.113974314455770 |
|                   | Dorsal Attention  | -.084252834736587* | .018011627984540 | <.001 | -.141593041012933 | -.026912628460240 |
|                   | Ventral Attention | -.058094412058542* | .016192807658066 | .019  | -.110535991473508 | -.005652832643577 |
|                   | Fronto-parietal   | -.075246118661778* | .017777220418927 | .002  | -.131918808260778 | -.018573429062778 |
|                   | Default Mode      | -.090031554279778* | .016035651012595 | <.001 | -.142037313087382 | -.038025795472175 |
| Fronto-parietal   | Visual            | -.098206698052394* | .013127895630619 | <.001 | -.139161325356481 | -.057252070748308 |
|                   | Somatomotor       | -.091611007694726* | .012871016098738 | <.001 | -.131832656955260 | -.051389358434193 |
|                   | Dorsal Attention  | -.009006716074809  | .014899865035497 | 1.000 | -.055525675285780 | .037512243136162  |
|                   | Ventral Attention | .017151706603235   | .012640975250102 | .984  | -.022414997508466 | .056718410714937  |
|                   | Limbic            | .075246118661778*  | .017777220418927 | .002  | .018573429062778  | .131918808260778  |
|                   | Default Mode      | -.014785435618001  | .012439024833977 | .997  | -.053668368054729 | .024097496818728  |
| Default Mode      | Visual            | -.083421262434394* | .010651487279391 | <.001 | -.116364867274805 | -.050477657593982 |
|                   | Somatomotor       | -.076825572076725* | .010333227617186 | <.001 | -.108815285274699 | -.044835858878752 |
|                   | Dorsal Attention  | .005778719543192   | .012771785922518 | 1.000 | -.034212614569463 | .045770053655846  |
|                   | Ventral Attention | .031937142221236*  | .010045237321651 | .039  | .000813643597768  | .063060640844704  |
|                   | Limbic            | .090031554279778*  | .016035651012595 | <.001 | .038025795472175  | .142037313087382  |
|                   | Fronto-parietal   | .014785435618001   | .012439024833977 | .997  | -.024097496818728 | .053668368054729  |

\*. The mean difference is significant at the 0.05 level.

**Supplemental Table 15: Mean differences in structure-function coupling across the 7 resting-state functional networks.** One-way ANOVA table with post-hoc correction for multiple comparisons (Tamhane's T2 – equal variances not assumed): Dependent variable: Structure-function coupling; factor: Resting-state functional networks. Data derived from the 100 unrelated HCP subjects, analyzed using the HCP multi-modal atlas.

## Supplemental Table 16

### Multiple Comparisons

Dependent Variable: Structure-Function Coupling

Test: Tamhane

| (I) Cyto-architectonic classes | (J) Cyto-architectonic classes | Mean Difference (I-J) | Std. Error       | Sig.  | 95% Confidence Interval |                   |
|--------------------------------|--------------------------------|-----------------------|------------------|-------|-------------------------|-------------------|
|                                |                                |                       |                  |       | Lower Bound             | Upper Bound       |
| Agranular                      | Frontal                        | -.031393611993111*    | .010588691139072 | .036  | -.061616598590347       | -.001170625395876 |
|                                | Parietal                       | -.078536163634367*    | .012220454391461 | <.001 | -.113281772319706       | -.043790554949027 |
|                                | Polar                          | .042970489686404      | .019237787376667 | .277  | -.014459914419736       | .100400893792543  |
|                                | Granular                       | -.091632473294457*    | .019347038147953 | <.001 | -.150250601727033       | -.033014344861882 |
| Frontal                        | Agranular                      | .031393611993111*     | .010588691139072 | .036  | .001170625395876        | .061616598590347  |
|                                | Parietal                       | -.047142551641255*    | .009870464212241 | <.001 | -.075148010242777       | -.019137093039734 |
|                                | Polar                          | .074364101679515*     | .017837573304158 | .003  | .019973494345965        | .128754709013065  |
|                                | Granular                       | -.060238861301346*    | .017955345814818 | .028  | -.116097650215567       | -.004380072387125 |
| Parietal                       | Agranular                      | .078536163634367*     | .012220454391461 | <.001 | .043790554949028        | .113281772319706  |
|                                | Frontal                        | .047142551641256*     | .009870464212241 | <.001 | .019137093039734        | .075148010242777  |
|                                | Polar                          | .121506653320771*     | .018852006441658 | <.001 | .064967695753079        | .178045610888462  |
|                                | Granular                       | -.013096309660090     | .018963479871185 | .999  | -.070890528238412       | .044697908918232  |
| Polar                          | Agranular                      | -.042970489686404     | .019237787376667 | .277  | -.100400893792543       | .014459914419736  |
|                                | Frontal                        | -.074364101679515*    | .017837573304158 | .003  | -.128754709013065       | -.019973494345965 |
|                                | Parietal                       | -.121506653320771*    | .018852006441658 | <.001 | -.178045610888462       | -.064967695753079 |
|                                | Granular                       | -.134602962980861*    | .024090797546800 | <.001 | -.206020639278371       | -.063185286683350 |
| Granular                       | Agranular                      | .091632473294457*     | .019347038147953 | <.001 | .033014344861882        | .150250601727033  |
|                                | Frontal                        | .060238861301346*     | .017955345814818 | .028  | .004380072387125        | .116097650215567  |
|                                | Parietal                       | .013096309660090      | .018963479871185 | .999  | -.044697908918232       | .070890528238412  |
|                                | Polar                          | .134602962980861*     | .024090797546800 | <.001 | .063185286683350        | .206020639278371  |

\*. The mean difference is significant at the 0.05 level.

**Supplemental Table 16: Mean differences in structure-function coupling across the 5 von-Economo/Koskinas-inspired cyto-architectonic classes.** One-way ANOVA table with post-hoc correction for multiple comparisons (Tamhane's T2 – equal variances not assumed): Dependent variable: Structure-function coupling; factor: Cyto-architectonic classes. Data derived from the 100 unrelated HCP subjects, analyzed using the HCP multi-modal atlas.

## Supplemental Table 17

### Multiple Comparisons

Dependent Variable: Temporal Structure-Function Coupling Variance

Test: Tamhane

| Resting-state functional networks | Resting-state functional networks | Mean Difference (I-J) | Std. Error       | Sig.  | 95% Confidence Interval |                   |
|-----------------------------------|-----------------------------------|-----------------------|------------------|-------|-------------------------|-------------------|
|                                   |                                   |                       |                  |       | Lower Bound             | Upper Bound       |
| Visual                            | Somatomotor                       | -.000644763768222*    | .000196551583272 | .029  | -.001255195532850       | -.000034332003595 |
|                                   | Dorsal Attention                  | .000035061888054      | .000191377616998 | 1.000 | -.000560977943323       | .000631101719430  |
|                                   | Ventral Attention                 | -.000504000165758     | .000231117768225 | .495  | -.001226258148620       | .000218257817105  |

|                   |                   |                    |                   |                  |                   |                   |
|-------------------|-------------------|--------------------|-------------------|------------------|-------------------|-------------------|
|                   | Limbic            | -.004866947966887* | .000698430782721  | <.001            | -.007194908386460 | -.002538987547314 |
|                   | Fronto-parietal   | -.000704377184006* | .000224930645473  | .049             | -.001407950665982 | -.000000803702030 |
|                   | Default Mode      | -.001498539856996* | .000253648956782  | <.001            | -.002282887795359 | -.000714191918634 |
| Somatomotor       | Visual            | .000644763768222*  | .000196551583272  | .029             | .000034332003595  | .001255195532850  |
|                   | Dorsal Attention  | .000679825656276*  | .000206632886918  | .029             | .000036327730329  | .001323323582223  |
|                   | Ventral Attention | .000140763602465   | .000243899939437  | 1.000            | -.000619694384840 | .000901221589770  |
|                   | Limbic            | -.004222184198665* | .000702764054232  | <.001            | -.006559083122257 | -.001885285275072 |
|                   | Fronto-parietal   | -.000059613415783  | .000238045274982  | 1.000            | -.000802435621620 | .000683208790053  |
|                   | Default Mode      | -.000853776088774* | .000265347980857  | .034             | -.001673715965942 | -.000033836211606 |
|                   | Dorsal Attention  | Visual             | -.000035061888054 | .000191377616998 | 1.000             | -.000631101719430 |
|                   | Somatomotor       | -.000679825656276* | .000206632886918  | .029             | -.001323323582223 | -.000036327730329 |
|                   | Ventral Attention | -.000539062053811  | .000239749969466  | .439             | -.001288118038365 | .000209993930743  |
|                   | Limbic            | -.004902009854941* | .000701334573026  | <.001            | -.007235991093424 | -.002568028616457 |
|                   | Fronto-parietal   | -.000739439072059* | .000233791403483  | .045             | -.001470613577557 | -.000008264566562 |
|                   | Default Mode      | -.001533601745050* | .000261538559961  | <.001            | -.002342719593896 | -.000724483896204 |
| Ventral Attention | Visual            | .000504000165758   | .000231117768225  | .495             | -.000218257817105 | .001226258148620  |
|                   | Somatomotor       | -.000140763602465  | .000243899939437  | 1.000            | -.000901221589770 | .000619694384840  |
|                   | Dorsal Attention  | .000539062053811   | .000239749969466  | .439             | -.000209993930743 | .001288118038365  |
|                   | Limbic            | -.004362947801129* | .000713204188030  | <.001            | -.006722053205082 | -.002003842397176 |
|                   | Fronto-parietal   | -.000200377018248  | .000267298430305  | 1.000            | -.001033752580219 | .000632998543722  |
|                   | Default Mode      | -.000994539691239* | .000291877455189  | .018             | -.001897217734338 | -.000091861648140 |
| Limbic            | Visual            | .004866947966887*  | .000698430782721  | <.001            | .002538987547314  | .007194908386460  |
|                   | Somatomotor       | .004222184198665*  | .000702764054232  | <.001            | .001885285275072  | .006559083122257  |
|                   | Dorsal Attention  | .004902009854941*  | .000701334573026  | <.001            | .002568028616457  | .007235991093424  |
|                   | Ventral Attention | .004362947801129*  | .000713204188030  | <.001            | .002003842397176  | .006722053205082  |
|                   | Fronto-parietal   | .004162570782881*  | .000711223302702  | <.001            | .001807698415285  | .006517443150477  |
|                   | Default Mode      | .003368408109890*  | .000720820771281  | .001             | .000993092952972  | .005743723266809  |
| Fronto-parietal   | Visual            | .000704377184006*  | .000224930645473  | .049             | .000000803702030  | .001407950665982  |
|                   | Somatomotor       | .000059613415783   | .000238045274982  | 1.000            | -.000683208790053 | .000802435621620  |
|                   | Dorsal Attention  | .000739439072059*  | .000233791403483  | .045             | .000008264566562  | .001470613577557  |
|                   | Ventral Attention | .000200377018248   | .000267298430305  | 1.000            | -.000632998543722 | .001033752580219  |
|                   | Limbic            | -.004162570782881* | .000711223302702  | <.001            | -.006517443150477 | -.001807698415285 |
|                   | Default Mode      | -.000794162672991  | .000287003173033  | .128             | -.001682153433412 | .000093828087431  |
| Default Mode      | Visual            | .001498539856996*  | .000253648956782  | <.001            | .000714191918634  | .002282887795359  |
|                   | Somatomotor       | .000853776088774*  | .000265347980857  | .034             | .000033836211606  | .001673715965942  |
|                   | Dorsal Attention  | .001533601745050*  | .000261538559961  | <.001            | .000724483896204  | .002342719593896  |
|                   | Ventral Attention | .000994539691239*  | .000291877455189  | .018             | .000091861648140  | .001897217734338  |
|                   | Limbic            | -.003368408109890* | .000720820771281  | .001             | -.005743723266809 | -.000993092952972 |

|                 |                  |                  |      |                   |                  |
|-----------------|------------------|------------------|------|-------------------|------------------|
| Fronto-parietal | .000794162672991 | .000287003173033 | .128 | -0.00093828087431 | .001682153433412 |
|-----------------|------------------|------------------|------|-------------------|------------------|

\*. The mean difference is significant at the 0.05 level.

**Supplemental Table 17: Mean differences in temporal structure-function coupling variance across the 7 resting-state functional networks.** One-way ANOVA table with post-hoc correction for multiple comparisons (Tamhane's T2 – equal variances not assumed); Dependent variable: Temporal structure-function coupling variance; factor: Resting-state functional networks. Data derived from the 100 unrelated HCP subjects, analyzed using the HCP multi-modal atlas.

## Supplemental Table 18

### Multiple Comparisons

Dependent Variable: Temporal Structure-Function Coupling Variance

Test: Tamhane

| (I) Cyto-architectonic classes | (J) Cyto-architectonic classes | Mean Difference (I-J) | Std. Error       | Sig.  | 95% Confidence Interval |                   |
|--------------------------------|--------------------------------|-----------------------|------------------|-------|-------------------------|-------------------|
|                                |                                |                       |                  |       | Lower Bound             | Upper Bound       |
| Agranular                      | Frontal                        | .000029007357304      | .000251970747020 | 1.000 | -.000691082944608       | .000749097659216  |
|                                | Parietal                       | .000466081754380      | .000254762283098 | .516  | -.000262004358687       | .001194167867446  |
|                                | Polar                          | -.004784469640829*    | .000650135247800 | <.001 | -.006760127105449       | -.002808812176209 |
|                                | Granular                       | -.000534238374398     | .000472671555764 | .956  | -.001967237622433       | .000898760873638  |
| Frontal                        | Agranular                      | -.000029007357304     | .000251970747020 | 1.000 | -.000749097659216       | .000691082944608  |
|                                | Parietal                       | .000437074397075      | .000178737328713 | .142  | -.000068353307819       | .000942502101970  |
|                                | Polar                          | -.004813476998133*    | .000624274821067 | <.001 | -.006738227390162       | -.002888726606104 |
|                                | Granular                       | -.000563245731702     | .000436419077739 | .906  | -.001925284191606       | .000798792728202  |
| Parietal                       | Agranular                      | -.000466081754380     | .000254762283098 | .516  | -.001194167867446       | .000262004358687  |
|                                | Frontal                        | -.000437074397075     | .000178737328713 | .142  | -.000942502101970       | .000068353307819  |
|                                | Polar                          | -.005250551395209*    | .000625406760240 | <.001 | -.007177448746103       | -.003323654044314 |
|                                | Granular                       | -.001000320128777     | .000438036727855 | .282  | -.002365286835226       | .000364646577671  |
| Polar                          | Agranular                      | .004784469640829*     | .000650135247800 | <.001 | .002808812176209        | .006760127105449  |
|                                | Frontal                        | .004813476998133*     | .000624274821067 | <.001 | .002888726606104        | .006738227390162  |
|                                | Parietal                       | .005250551395209*     | .000625406760240 | <.001 | .003323654044314        | .007177448746103  |
|                                | Granular                       | .004250231266431*     | .000741382623544 | <.001 | .002044982752900        | .006455479779963  |
| Granular                       | Agranular                      | .000534238374398      | .000472671555764 | .956  | -.000898760873638       | .001967237622433  |
|                                | Frontal                        | .000563245731702      | .000436419077739 | .906  | -.000798792728202       | .001925284191606  |
|                                | Parietal                       | .001000320128777      | .000438036727855 | .282  | -.000364646577671       | .002365286835226  |
|                                | Polar                          | -.004250231266431*    | .000741382623544 | <.001 | -.006455479779963       | -.002044982752900 |

\*. The mean difference is significant at the 0.05 level.

**Supplemental Table 18: Mean differences in temporal structure-function coupling variance across the 5 von-Economo/Koskinas-inspired cyto-architectonic classes.** One-way ANOVA table with post-hoc correction for

multiple comparisons (Tamhane’s T2 – equal variances not assumed): Dependent variable: Temporal structure-function coupling variance; factor: Cyto-architectonic classes. Data derived from the 100 unrelated HCP subjects, analyzed using the HCP multi-modal atlas.

**Supplemental Table 19**

| <b>A. Structure-Function Coupling</b>                   |                             |                  |                                    |                       |                  |                                    |            |
|---------------------------------------------------------|-----------------------------|------------------|------------------------------------|-----------------------|------------------|------------------------------------|------------|
|                                                         | <b>Intracortical Myelin</b> |                  |                                    | <b>Hurst Exponent</b> |                  |                                    |            |
| <b>Cortical Type</b>                                    | $\beta_{stand}$             | 95% <i>BCI</i>   | Bootstrapped <i>p</i> -value (FDR) | $\beta_{stand}$       | 95% <i>BCI</i>   | Bootstrapped <i>p</i> -value (FDR) | <i>VIF</i> |
| Granular                                                | 0.384                       | [0.379, 0.387]   | 0.055                              | 0.451                 | [0.463, 0.472]   | 0.040                              | 1.01       |
| Polar                                                   | -0.387                      | [-0.394, -0.388] | 0.030                              | 0.128                 | [0.105, 0.112]   | 0.614                              | 1.04       |
| Parietal                                                | 0.424                       | [0.430, 0.435]   | <10 <sup>-4</sup>                  | 0.342                 | [0.334, 0.338]   | 0.016                              | 1.01       |
| Frontal                                                 | 0.420                       | [0.419, 0.422]   | <10 <sup>-4</sup>                  | 0.227                 | [0.222, 0.225]   | 0.040                              | 1.08       |
| Agranular                                               | 0.488                       | [0.477, 0.482]   | 0.005                              | -0.026                | [-0.038, -0.033] | 0.800                              | 1.32       |
| <b>B. Temporal Structure-Function Coupling Variance</b> |                             |                  |                                    |                       |                  |                                    |            |
|                                                         | <b>Intracortical Myelin</b> |                  |                                    | <b>Hurst Exponent</b> |                  |                                    |            |
| <b>Cortical Type</b>                                    | $\beta_{stand}$             | 95% <i>BCI</i>   | Bootstrapped <i>p</i> -value (FDR) | $\beta_{stand}$       | 95% <i>BCI</i>   | Bootstrapped <i>p</i> -value (FDR) | <i>VIF</i> |
| Granular                                                | -0.183                      | [-0.183, -0.176] | 0.773                              | -0.741                | [-0.746, -0.739] | <10 <sup>-4</sup>                  | 1.01       |
| Polar                                                   | 0.018                       | [0.005, 0.009]   | 0.867                              | -0.847                | [-0.859, -0.854] | <10 <sup>-4</sup>                  | 1.04       |
| Parietal                                                | -0.162                      | [-0.159, -0.157] | 0.063                              | -0.757                | [-0.760, -0.756] | <10 <sup>-4</sup>                  | 1.01       |
| Frontal                                                 | -0.041                      | [-0.042, -0.040] | 0.819                              | -0.540                | [-0.540, -0.536] | <10 <sup>-4</sup>                  | 1.08       |
| Agranular                                               | 0.046                       | [0.038, 0.042]   | 0.819                              | -0.756                | [-0.757, -0.752] | <10 <sup>-4</sup>                  | 1.32       |

**Supplemental Table 19: Atlas-based multiple linear regression analyses** – Results corresponding to the atlas-based (HCP multi-modal cortical parcellation) analyses discussed in section: ‘Biological Correlates of Structure-Function Coupling: Regional perspective’ of our **Supplementary Analysis 2B** section above.  $\beta_{stand}$ : standardized  $\beta$  coefficient; 95% *BCI*: 95% bootstrapped standardized  $\beta$  coefficient confidence interval; Bootstrapped *p*-value (FDR):

bootstrapped *p*-value adjusted for multiple comparisons (two-tailed test; false discovery rate: Benjamini-Hochberg method); *VIF*: Variance Inflation Factor.

## Supplemental Table 20

### Multiple Comparisons

Dependent Variable: Structure-Function Coupling

Test: Tamhane

| (I) Resting-state functional networks | (J) Resting-state functional networks | Mean Difference (I-J) | Std. Error    | Sig.  | 95% Confidence Interval |               |
|---------------------------------------|---------------------------------------|-----------------------|---------------|-------|-------------------------|---------------|
|                                       |                                       |                       |               |       | Lower Bound             | Upper Bound   |
| Visual                                | Somatomotor                           | .046571860093*        | .012085556725 | .004  | -.00924424789           | .08389947230  |
|                                       | Dorsal Attention                      | .102452385791*        | .013670633892 | <.001 | .05973252997            | .14517224161  |
|                                       | Ventral Attention                     | .074065390806*        | .020485675619 | .013  | .00931098240            | .13881979921  |
|                                       | Limbic                                | .072603990842         | .024628215535 | .125  | -.00934961429           | .15455759597  |
|                                       | Fronto-parietal                       | .116884042448*        | .023993919714 | <.001 | .04098685964            | .19278122526  |
|                                       | Default Mode                          | .095750893648*        | .019238360260 | <.001 | .03613178235            | .15537000494  |
| Somatomotor                           | Visual                                | -.046571860093*       | .012085556725 | .004  | -.08389947230           | -.00924424789 |
|                                       | Dorsal Attention                      | .055880525698*        | .014531189922 | .004  | .01068604928            | .10107500212  |
|                                       | Ventral Attention                     | .027493530713         | .021069697556 | .990  | -.03883480452           | .09382186595  |
|                                       | Limbic                                | .026032130749         | .025116095437 | 1.000 | -.05695669605           | .10902095755  |
|                                       | Fronto-parietal                       | .070312182356         | .024494436773 | .110  | -.00692075104           | .14754511575  |
|                                       | Default Mode                          | .049179033555         | .019859097538 | .265  | -.01223354095           | .11059160806  |
| Dorsal Attention                      | Visual                                | -.102452385791*       | .013670633892 | <.001 | -.14517224161           | -.05973252997 |
|                                       | Somatomotor                           | -.055880525698*       | .014531189922 | .004  | -.10107500212           | -.01068604928 |
|                                       | Ventral Attention                     | -.028386994985        | .022017213829 | .991  | -.09746692193           | .04069293196  |
|                                       | Limbic                                | -.029848394949        | .025916091519 | .998  | -.11471777540           | .05502098550  |
|                                       | Fronto-parietal                       | .014431656657         | .025314086641 | 1.000 | -.06512206101           | .09398537432  |
|                                       | Default Mode                          | -.006701492143        | .020861670707 | 1.000 | -.07120701796           | .05780403367  |
| Ventral Attention                     | Visual                                | -.074065390806*       | .020485675619 | .013  | -.13881979921           | -.00931098240 |
|                                       | Somatomotor                           | -.027493530713        | .021069697556 | .990  | -.09382186595           | .03883480452  |
|                                       | Dorsal Attention                      | .028386994985         | .022017213829 | .991  | -.04069293196           | .09746692193  |
|                                       | Limbic                                | -.001461399965        | .030073584326 | 1.000 | -.09728164658           | .09435884665  |
|                                       | Fronto-parietal                       | .042818651642         | .029556380986 | .968  | -.04927491838           | .13491222166  |
|                                       | Default Mode                          | .021685502842         | .025845424726 | 1.000 | -.05843550184           | .10180650752  |
| Limbic                                | Visual                                | -.072603990842        | .024628215535 | .125  | -.15455759597           | .00934961429  |
|                                       | Somatomotor                           | -.026032130749        | .025116095437 | 1.000 | -.10902095755           | .05695669605  |
|                                       | Dorsal Attention                      | .029848394949         | .025916091519 | .998  | -.05502098550           | .11471777540  |
|                                       | Ventral Attention                     | .001461399965         | .030073584326 | 1.000 | -.09435884665           | .09728164658  |

|                 |                   |                 |                 |               |               |               |
|-----------------|-------------------|-----------------|-----------------|---------------|---------------|---------------|
|                 | Fronto-parietal   | .044280051607   | .032564793134   | .984          | -.05867814848 | .14723825169  |
|                 | Default Mode      | .023146902806   | .029238195466   | 1.000         | -.07001315299 | .11630695860  |
| Fronto-parietal | Visual            | -.116884042448* | .023993919714   | <.001         | -.19278122526 | -.04098685964 |
|                 | Somatomotor       | -.070312182356  | .024494436773   | .110          | -.14754511575 | .00692075104  |
|                 | Dorsal Attention  | -.014431656657  | .025314086641   | 1.000         | -.09398537432 | .06512206101  |
|                 | Ventral Attention | -.042818651642  | .029556380986   | .968          | -.13491222166 | .04927491838  |
|                 | Limbic            | -.044280051607  | .032564793134   | .984          | -.14723825169 | .05867814848  |
|                 | Default Mode      | -.021133148800  | .028705944627   | 1.000         | -.11031381899 | .06804752139  |
|                 | Default Mode      | Visual          | -.095750893648* | .019238360260 | <.001         | -.15537000494 |
|                 | Somatomotor       | -.049179033555  | .019859097538   | .265          | -.11059160806 | .01223354095  |
|                 | Dorsal Attention  | .006701492143   | .020861670707   | 1.000         | -.05780403367 | .07120701796  |
|                 | Ventral Attention | -.021685502842  | .025845424726   | 1.000         | -.10180650752 | .05843550184  |
|                 | Limbic            | -.023146902806  | .029238195466   | 1.000         | -.11630695860 | .07001315299  |
|                 | Fronto-parietal   | .021133148800   | .028705944627   | 1.000         | -.06804752139 | .11031381899  |

\*. The mean difference is significant at the 0.05 level.

**Supplemental Table 20: Mean differences in structure-function coupling across the 7 resting-state functional networks.** One-way ANOVA table with post-hoc correction for multiple comparisons (Tamhane's T2 – equal variances not assumed): Dependent variable: Structure-function coupling; factor: Resting-state functional networks. Data derived from the 14 Penn subjects, analyzed using the Schaefer 400 atlas.

## Supplemental Table 21

### Multiple Comparisons

Dependent Variable: Structure-Function Coupling

Test: Tamhane

| (I) Cyto-architectonic classes | (J) Cyto-architectonic classes | Mean Difference |               | Sig.  | 95% Confidence Interval |               |
|--------------------------------|--------------------------------|-----------------|---------------|-------|-------------------------|---------------|
|                                |                                | (I-J)           | Std. Error    |       | Lower Bound             | Upper Bound   |
| Agranular                      | Frontal                        | -.015546811608  | .019274271698 | .996  | -.07041831243           | .03932468922  |
|                                | Parietal                       | -.063639772380* | .018726047030 | .009  | -.11707375860           | -.01020578616 |
|                                | Polar                          | -.025422840145  | .030967215421 | .995  | -.11747328708           | .06662760679  |
|                                | Granular                       | -.077815060676  | .026796084602 | .055  | -.15662981791           | .00099969656  |
| Frontal                        | Agranular                      | .015546811608   | .019274271698 | .996  | -.03932468922           | .07041831243  |
|                                | Parietal                       | -.048092960772* | .013061719163 | .003  | -.08498008565           | -.01120583589 |
|                                | Polar                          | -.009876028537  | .027908996776 | 1.000 | -.09522582511           | .07547376804  |
|                                | Granular                       | -.062268249068  | .023194262655 | .114  | -.13272992081           | .00819342267  |
| Parietal                       | Agranular                      | .063639772380*  | .018726047030 | .009  | .01020578616            | .11707375860  |
|                                | Frontal                        | .048092960772*  | .013061719163 | .003  | .01120583589            | .08498008565  |
|                                | Polar                          | .038216932235   | .027533241526 | .858  | -.04641967292           | .12285353739  |



|          |           |                |               |       |               |              |
|----------|-----------|----------------|---------------|-------|---------------|--------------|
| Polar    | Granular  | -.014175288296 | .022740736751 | 1.000 | -.08374971571 | .05539913911 |
|          | Agranular | .025422840145  | .030967215421 | .995  | -.06662760679 | .11747328708 |
|          | Frontal   | .009876028537  | .027908996776 | 1.000 | -.07547376804 | .09522582511 |
|          | Parietal  | -.038216932235 | .027533241526 | .858  | -.12285353739 | .04641967292 |
|          | Granular  | -.052392220531 | .033547648227 | .742  | -.15213637083 | .04735192977 |
| Granular | Agranular | .077815060676  | .026796084602 | .055  | -.00099969656 | .15662981791 |
|          | Frontal   | .062268249068  | .023194262655 | .114  | -.00819342267 | .13272992081 |
|          | Parietal  | .014175288296  | .022740736751 | 1.000 | -.05539913911 | .08374971571 |
|          | Polar     | .052392220531  | .033547648227 | .742  | -.04735192977 | .15213637083 |

\*. The mean difference is significant at the 0.05 level.

**Supplemental Table 21: Mean differences in structure-function coupling across the 5 von-Economo/Koskinas-inspired cyto-architectonic classes.** One-way ANOVA table with post-hoc correction for multiple comparisons (Tamhane's T2 – equal variances not assumed): Dependent variable: Structure-function coupling; factor: Cyto-architectonic classes. Data derived from the 14 Penn subjects, analyzed using the Schaefer 400 atlas.

## Supplemental Table 22

### Multiple Comparisons

Dependent Variable: Temporal Structure-Function Coupling Variance

Test: Tamhane

| (I) Resting-state<br>functional networks | (J) Resting-state<br>functional networks | Mean Difference<br>(I-J) | Std. Error    | Sig.  | 95% Confidence Interval |               |
|------------------------------------------|------------------------------------------|--------------------------|---------------|-------|-------------------------|---------------|
|                                          |                                          |                          |               |       | Lower Bound             | Upper Bound   |
| Visual                                   | Somatomotor                              | -.019355395635*          | .004450437805 | <.001 | -.0323580953            | -.00547498174 |
|                                          | Dorsal Attention                         | -.006240959101           | .003365738827 | .775  | -.01688583165           | .00440391345  |
|                                          | Ventral Attention                        | -.032452431217*          | .008241598832 | .006  | -.05881187431           | -.00609298812 |
|                                          | Limbic                                   | -.044655912932*          | .008553793779 | <.001 | -.07360632101           | -.01570550485 |
|                                          | Fronto-parietal                          | -.044847718017*          | .011568246138 | .006  | -.08177013595           | -.00792530009 |
|                                          | Default Mode                             | -.039087689790*          | .007146225690 | <.001 | -.06136953406           | -.01680584552 |
| Somatomotor                              | Visual                                   | .019355395635*           | .004450437805 | <.001 | .00547498174            | .0323580953   |
|                                          | Dorsal Attention                         | .013114436534            | .005267744251 | .259  | -.00319419845           | .02942307152  |
|                                          | Ventral Attention                        | -.013097035582           | .009183947025 | .973  | -.04195761841           | .01576354725  |
|                                          | Limbic                                   | -.025300517297           | .009465110652 | .212  | -.05619063183           | .00558959723  |
|                                          | Fronto-parietal                          | -.025492322382           | .012257456929 | .591  | -.06421075753           | .01322611277  |
|                                          | Default Mode                             | -.019732294155           | .008215197701 | .312  | -.04509762238           | .00563303407  |
| Dorsal Attention                         | Visual                                   | .006240959101            | .003365738827 | .775  | -.00440391345           | .01688583165  |
|                                          | Somatomotor                              | -.013114436534           | .005267744251 | .259  | -.02942307152           | .00319419845  |
|                                          | Ventral Attention                        | -.026211472116           | .008710148342 | .078  | -.05379386338           | .00137091915  |
|                                          | Limbic                                   | -.038414953832*          | .009006115747 | .004  | -.06827923828           | -.00855066938 |

|                   |                   |                 |               |       |               |               |
|-------------------|-------------------|-----------------|---------------|-------|---------------|---------------|
|                   | Fronto-parietal   | -.038606758917* | .011906596976 | .041  | -.07640153922 | -.00081197861 |
|                   | Default Mode      | -.032846730689* | .007681879617 | <.001 | -.05666289517 | -.00903056621 |
| Ventral Attention | Visual            | .032452431217*  | .008241598832 | .006  | .00609298812  | .05881187431  |
|                   | Somatomotor       | .013097035582   | .009183947025 | .973  | -.01576354725 | .04195761841  |
|                   | Dorsal Attention  | .026211472116   | .008710148342 | .078  | -.00137091915 | .05379386338  |
|                   | Limbic            | -.012203481715  | .011734814626 | .999  | -.04934599515 | .02493903172  |
|                   | Fronto-parietal   | -.012395286800  | .014084133094 | 1.000 | -.05636245651 | .03157188291  |
|                   | Default Mode      | -.006635258573  | .010752070866 | 1.000 | -.04000910419 | .02673858704  |
| Limbic            | Visual            | .044655912932*  | .008553793779 | <.001 | .01570550485  | .07360632101  |
|                   | Somatomotor       | .025300517297   | .009465110652 | .212  | -.00558959723 | .05619063183  |
|                   | Dorsal Attention  | .038414953832*  | .009006115747 | .004  | .00855066938  | .06827923828  |
|                   | Ventral Attention | .012203481715   | .011734814626 | .999  | -.02493903172 | .04934599515  |
|                   | Fronto-parietal   | -.000191805085  | .014269065902 | 1.000 | -.04502549228 | .04464188211  |
|                   | Default Mode      | .005568223142   | .010993200836 | 1.000 | -.02926650112 | .04040294740  |
| Fronto-parietal   | Visual            | .044847718017*  | .011568246138 | .006  | .00792530009  | .08177013595  |
|                   | Somatomotor       | .025492322382   | .012257456929 | .591  | -.01322611277 | .06421075753  |
|                   | Dorsal Attention  | .038606758917*  | .011906596976 | .041  | .00081197861  | .07640153922  |
|                   | Ventral Attention | .012395286800   | .014084133094 | 1.000 | -.03157188291 | .05636245651  |
|                   | Limbic            | .000191805085   | .014269065902 | 1.000 | -.04464188211 | .04502549228  |
|                   | Default Mode      | .005760028227   | .013472468048 | 1.000 | -.03632039553 | .04784045198  |
| Default Mode      | Visual            | .039087689790*  | .007146225690 | <.001 | .01680584552  | .06136953406  |
|                   | Somatomotor       | .019732294155   | .008215197701 | .312  | -.00563303407 | .04509762238  |
|                   | Dorsal Attention  | .032846730689*  | .007681879617 | <.001 | .00903056621  | .05666289517  |
|                   | Ventral Attention | .006635258573   | .010752070866 | 1.000 | -.02673858704 | .04000910419  |
|                   | Limbic            | -.005568223142  | .010993200836 | 1.000 | -.04040294740 | .02926650112  |
|                   | Fronto-parietal   | -.005760028227  | .013472468048 | 1.000 | -.04784045198 | .03632039553  |

\*. The mean difference is significant at the 0.05 level.

**Supplemental Table 22: Mean differences in temporal structure-function coupling variance across the 7 resting-state functional networks.** One-way ANOVA table with post-hoc correction for multiple comparisons (Tamhane's T2 – equal variances not assumed); Dependent variable: Temporal structure-function coupling variance; factor: Resting-state functional networks. Data derived from the 14 Penn subjects, analyzed using the Schaefer 400 atlas.

## Supplemental Table 23

### Multiple Comparisons

Dependent Variable: Temporal Structure-Function Coupling Variance

Test: Tamhane

| (I) Cyto-architectonic classes | (J) Cyto-architectonic classes | Mean Difference |               |       | 95% Confidence Interval |               |
|--------------------------------|--------------------------------|-----------------|---------------|-------|-------------------------|---------------|
|                                |                                | (I-J)           | Std. Error    | Sig.  | Lower Bound             | Upper Bound   |
| Agranular                      | Frontal                        | .009639618584   | .007829158548 | .917  | -.01259897913           | .03187821630  |
|                                | Parietal                       | .024060176447*  | .007240128943 | .012  | -.00339749917           | .04472285372  |
|                                | Polar                          | .012948393733   | .011367563118 | .952  | -.02068152742           | .04657831488  |
|                                | Granular                       | .020581815956   | .012723846972 | .706  | -.01755193020           | .05871556211  |
| Frontal                        | Agranular                      | -.009639618584  | .007829158548 | .917  | -.03187821630           | .01259897913  |
|                                | Parietal                       | .014420557863   | .005549221440 | .094  | -.00124381476           | .03008493049  |
|                                | Polar                          | .003308775148   | .010372843521 | 1.000 | -.02803310449           | .03465065478  |
|                                | Granular                       | .010942197372   | .011843592076 | .989  | -.02530821289           | .04719260763  |
| Parietal                       | Agranular                      | -.024060176447* | .007240128943 | .012  | -.04472285372           | -.00339749917 |
|                                | Frontal                        | -.014420557863  | .005549221440 | .094  | -.03008493049           | .00124381476  |
|                                | Polar                          | -.011111782715  | .009935775070 | .959  | -.04157680686           | .01935324143  |
|                                | Granular                       | -.003478360491  | .011462740370 | 1.000 | -.03901723240           | .03206051142  |
| Polar                          | Agranular                      | -.012948393733  | .011367563118 | .952  | -.04657831488           | .02068152742  |
|                                | Frontal                        | -.003308775148  | .010372843521 | 1.000 | -.03465065478           | .02803310449  |
|                                | Parietal                       | .011111782715   | .009935775070 | .959  | -.01935324143           | .04157680686  |
|                                | Granular                       | .007633422224   | .014429013858 | 1.000 | -.03526148801           | .05052833246  |
| Granular                       | Agranular                      | -.020581815956  | .012723846972 | .706  | -.05871556211           | .01755193020  |
|                                | Frontal                        | -.010942197372  | .011843592076 | .989  | -.04719260763           | .02530821289  |
|                                | Parietal                       | .003478360491   | .011462740370 | 1.000 | -.03206051142           | .03901723240  |
|                                | Polar                          | -.007633422224  | .014429013858 | 1.000 | -.05052833246           | .03526148801  |

\*. The mean difference is significant at the 0.05 level.

**Supplemental Table 23: Mean differences in temporal structure-function coupling variance across the 5 von-Ekonomo/Koskinas-inspired cyto-architectonic classes.** One-way ANOVA table with post-hoc correction for multiple comparisons (Tamhane's T2 – equal variances not assumed): Dependent variable: Temporal structure-function coupling; factor: Cyto-architectonic classes. Data derived from the 14 Penn subjects, analyzed using the Schaefer 400 atlas.

### Supplemental Table 24

| A. Structure-Function Coupling |                      |                |                         |                               |                 |                  |                         |                               |      |
|--------------------------------|----------------------|----------------|-------------------------|-------------------------------|-----------------|------------------|-------------------------|-------------------------------|------|
| Cortical Type                  | Intracortical Myelin |                |                         |                               | Hurst Exponent  |                  |                         |                               |      |
|                                | $\beta_{stand}$      | 95% BCI        | Bootstrapped $p$ -value | Bootstrapped $p$ -value (FDR) | $\beta_{stand}$ | 95% BCI          | Bootstrapped $p$ -value | Bootstrapped $p$ -value (FDR) | VIF  |
| Granular                       | 0.128                | [0.101, 0.112] | 0.653                   | 0.653                         | 0.498           | [0.483, 0.494]   | 0.091                   | 0.152                         | 1.37 |
| Polar                          | 0.536                | [0.483, 0.497] | 0.107                   | 0.134                         | -0.540          | [-0.545, -0.535] | 0.016                   | 0.040                         | 1.18 |
| Parietal                       | 0.410                | [0.410, 0.415] | 0.001                   | 0.005                         | 0.255           | [0.251, 0.255]   | 0.010                   | 0.040                         | 1.11 |

|                                                         |                             |                  |                              |                                    |                       |                  |                              |                                    |            |
|---------------------------------------------------------|-----------------------------|------------------|------------------------------|------------------------------------|-----------------------|------------------|------------------------------|------------------------------------|------------|
| Frontal                                                 | 0.144                       | [0.144, 0.147]   | 0.102                        | 0.134                              | 0.019                 | [0.018, 0.021]   | 0.731                        | 0.731                              | 1.00       |
| Agranular                                               | 0.269                       | [0.265, 0.271]   | 0.044                        | 0.110                              | -0.040                | [-0.042, -0.038] | 0.721                        | 0.731                              | 1.00       |
| <b>B. Temporal Structure-Function Coupling Variance</b> |                             |                  |                              |                                    |                       |                  |                              |                                    |            |
|                                                         | <b>Intracortical Myelin</b> |                  |                              |                                    | <b>Hurst Exponent</b> |                  |                              |                                    |            |
| <b>Cortical Type</b>                                    | $\beta_{stand}$             | 95% <i>BCI</i>   | Bootstrapped <i>p</i> -value | Bootstrapped <i>p</i> -value (FDR) | $\beta_{stand}$       | 95% <i>BCI</i>   | Bootstrapped <i>p</i> -value | Bootstrapped <i>p</i> -value (FDR) | <i>VIF</i> |
| Granular                                                | -0.873                      | [-0.876, -0.865] | 4x10 <sup>-4</sup>           | 5x10 <sup>-4</sup>                 | -0.311                | [-0.303, -0.297] | 0.030                        | 0.050                              | 1.37       |
| Polar                                                   | -0.211                      | [-0.024, -0.001] | 0.651                        | 0.651                              | 0.116                 | [0.114, 0.129]   | 0.811                        | 0.855                              | 1.18       |
| Parietal                                                | -0.401                      | [-0.406, -0.403] | <10 <sup>-4</sup>            | <10 <sup>-4</sup>                  | -0.465                | [-0.472, -0.468] | <10 <sup>-4</sup>            | <10 <sup>-4</sup>                  | 1.11       |
| Frontal                                                 | -0.362                      | [-0.365, -0.362] | <10 <sup>-4</sup>            | <10 <sup>-4</sup>                  | -0.159                | [-0.161, -0.159] | 0.003                        | 0.007                              | 1.00       |
| Agranular                                               | -0.394                      | [-0.394, -0.390] | 2x10 <sup>-4</sup>           | 3.3x10 <sup>-4</sup>               | 0.022                 | [0.020, 0.025]   | 0.855                        | 0.855                              | 1.00       |

**Supplemental Table 24: Atlas-based multiple linear regression analyses** – Results corresponding to the atlas-based (Schaefer cortical parcellation) analyses discussed in section: ‘Biological Correlates of Structure-Function Coupling: Regional perspective’ of our **Supplementary Analysis 3** section above.  $\beta_{stand}$ : standardized  $\beta$  coefficient; 95% *BCI*: 95% bootstrapped standardized  $\beta$  coefficient confidence interval; Bootstrapped *p*-value: bootstrapped *p*-value (two-tailed test); Bootstrapped *p*-value (FDR): bootstrapped *p*-value adjusted for multiple comparisons (two-tailed test; false discovery rate: Benjamini-Hochberg method); *VIF*: Variance Inflation Factor.

## Supplemental Table 25

### Multiple Comparisons

Dependent Variable: Structure-Function Coupling

Test: Tamhane

| (I) Resting-state functional networks | (J) Resting-state functional networks | Mean Difference (I-J) | Std. Error  | Sig.  | 95% Confidence Interval |              |
|---------------------------------------|---------------------------------------|-----------------------|-------------|-------|-------------------------|--------------|
|                                       |                                       |                       |             |       | Lower Bound             | Upper Bound  |
| Visual                                | Somatomotor                           | -0.106235409*         | 0.001233326 | <.001 | -0.109973804            | -0.102497014 |
|                                       | Dorsal Attention                      | -0.044014034*         | 0.001368841 | <.001 | -0.048163435            | -0.039864633 |
|                                       | Ventral Attention                     | -0.032940312*         | 0.001563191 | <.001 | -0.037678993            | -0.028201631 |
|                                       | Limbic                                | 0.013946968*          | 0.001398494 | <.001 | 0.009707501             | 0.018186436  |
|                                       | Fronto-parietal                       | -0.015712364*         | 0.001358959 | <.001 | -0.019831683            | -0.011593045 |
|                                       | Default Mode                          | -0.020298196*         | 0.001163993 | <.001 | -0.023826305            | -0.016770087 |
| Somatomotor                           | Visual                                | 0.106235409*          | 0.001233326 | <.001 | 0.102497014             | 0.109973804  |
|                                       | Dorsal Attention                      | 0.062221375*          | 0.001501823 | <.001 | 0.05766897              | 0.066773781  |
|                                       | Ventral Attention                     | 0.073295097*          | 0.001672613 | <.001 | 0.068224886             | 0.078365308  |
|                                       | Limbic                                | 0.120182377*          | 0.001524345 | <.001 | 0.115561576             | 0.124803179  |
|                                       | Fronto-parietal                       | 0.090523045*          | 0.001490896 | <.001 | 0.08600386              | 0.09504223   |
|                                       | Default Mode                          | 0.085937213*          | 0.001310131 | <.001 | 0.081966095             | 0.089908331  |

|                   |                   |               |             |       |              |              |
|-------------------|-------------------|---------------|-------------|-------|--------------|--------------|
| Dorsal Attention  | Visual            | 0.044014034*  | 0.001368841 | <.001 | 0.039864633  | 0.048163435  |
|                   | Somatomotor       | -0.062221375* | 0.001501823 | <.001 | -0.066773781 | -0.05766897  |
|                   | Ventral Attention | 0.011073722*  | 0.001781448 | <.001 | 0.005673606  | 0.016473837  |
|                   | Limbic            | 0.057961002*  | 0.001641708 | <.001 | 0.052984396  | 0.062937608  |
|                   | Fronto-parietal   | 0.02830167*   | 0.001604262 | <.001 | 0.023438775  | 0.033164564  |
|                   | Default Mode      | 0.023715838*  | 0.001443879 | <.001 | 0.019339094  | 0.028092581  |
| Ventral Attention | Visual            | 0.032940312*  | 0.001563191 | <.001 | 0.028201631  | 0.037678993  |
|                   | Somatomotor       | -0.073295097* | 0.001672613 | <.001 | -0.078365308 | -0.068224886 |
|                   | Dorsal Attention  | -0.011073722* | 0.001781448 | <.001 | -0.016473837 | -0.005673606 |
|                   | Limbic            | 0.046887281*  | 0.001803335 | <.001 | 0.041420738  | 0.052353823  |
|                   | Fronto-parietal   | 0.017227948*  | 0.001771489 | <.001 | 0.011858075  | 0.022597822  |
|                   | Default Mode      | 0.012642116*  | 0.001622321 | <.001 | 0.007724333  | 0.017559899  |
| Limbic            | Visual            | -0.013946968* | 0.001398494 | <.001 | -0.018186436 | -0.009707501 |
|                   | Somatomotor       | -0.120182377* | 0.001524345 | <.001 | -0.124803179 | -0.115561576 |
|                   | Dorsal Attention  | -0.057961002* | 0.001641708 | <.001 | -0.062937608 | -0.052984396 |
|                   | Ventral Attention | -0.046887281* | 0.001803335 | <.001 | -0.052353823 | -0.041420738 |
|                   | Fronto-parietal   | -0.029659332* | 0.001633931 | <.001 | -0.034612298 | -0.024706366 |
|                   | Default Mode      | -0.034245165* | 0.001470567 | <.001 | -0.038702963 | -0.029787366 |
| Fronto-parietal   | Visual            | 0.015712364*  | 0.001358959 | <.001 | 0.011593045  | 0.019831683  |
|                   | Somatomotor       | -0.090523045* | 0.001490896 | <.001 | -0.09504223  | -0.08600386  |
|                   | Dorsal Attention  | -0.02830167*  | 0.001604262 | <.001 | -0.033164564 | -0.023438775 |
|                   | Ventral Attention | -0.017227948* | 0.001771489 | <.001 | -0.022597822 | -0.011858075 |
|                   | Limbic            | 0.029659332*  | 0.001633931 | <.001 | 0.024706366  | 0.034612298  |
|                   | Default Mode      | -0.004585832* | 0.0014309   | <.001 | -0.008923119 | -0.000248545 |
| Default Mode      | Visual            | 0.020298196*  | 0.001163993 | <.001 | 0.016770087  | 0.023826305  |
|                   | Somatomotor       | -0.085937213* | 0.001310131 | <.001 | -0.089908331 | -0.081966095 |
|                   | Dorsal Attention  | -0.023715838* | 0.001443879 | <.001 | -0.028092581 | -0.019339094 |
|                   | Ventral Attention | -0.012642116* | 0.001622321 | <.001 | -0.017559899 | -0.007724333 |
|                   | Limbic            | 0.034245165*  | 0.001470567 | <.001 | 0.029787366  | 0.038702963  |
|                   | Fronto-parietal   | 0.004585832*  | 0.0014309   | <.001 | 0.000248545  | 0.008923119  |

\*. The mean difference is significant at the 0.05 level.

**Supplemental Table 25: Mean differences in structure-function coupling across the 7 resting-state functional networks.** One-way ANOVA table with post-hoc correction for multiple comparisons (Tamhane's T2 – equal variances not assumed): Dependent variable: Structure-function coupling; factor: Resting-state functional networks. Data reported in each table column were averaged across the 9 subjects scanned at Penn that passed quality-control and analyzed using our voxel-based analysis approach; the  $p$ -values reported under the 'Sig.' column represent the combined  $p_{fisher}$  value across the 9 subjects.

## Supplemental Table 26

### Multiple Comparisons

Dependent Variable: Structure-Function Coupling

Test: Tamhane

| (I) Cyto-architectonic classes | (J) Cyto-architectonic classes | Mean Difference (I-J) | Std. Error | Sig.  | 95% Confidence Interval |             |
|--------------------------------|--------------------------------|-----------------------|------------|-------|-------------------------|-------------|
|                                |                                |                       |            |       | Lower Bound             | Upper Bound |
| Agranular                      | Frontal                        | -1.10E-03*            | 1.27E-03   | <.001 | -4.65E-03               | 2.45E-03    |
|                                | Parietal                       | -1.35E-02*            | 1.32E-03   | <.001 | -1.72E-02               | -9.81E-03   |
|                                | Polar                          | 1.59E-02*             | 1.68E-03   | <.001 | 1.12E-02                | 2.06E-02    |
|                                | Granular                       | -2.74E-02*            | 1.78E-03   | <.001 | -3.23E-02               | -2.24E-02   |
| Frontal                        | Agranular                      | 1.10E-03*             | 1.27E-03   | <.001 | -2.45E-03               | 4.65E-03    |
|                                | Parietal                       | -1.24E-02*            | 1.02E-03   | <.001 | -1.53E-02               | -9.55E-03   |
|                                | Polar                          | 1.70E-02*             | 1.45E-03   | <.001 | 1.29E-02                | 2.10E-02    |
|                                | Granular                       | -2.63E-02*            | 1.56E-03   | <.001 | -3.06E-02               | -2.19E-02   |
| Parietal                       | Agranular                      | 1.35E-02*             | 1.32E-03   | <.001 | 9.81E-03                | 1.72E-02    |
|                                | Frontal                        | 1.24E-02*             | 1.02E-03   | <.001 | 9.55E-03                | 1.53E-02    |
|                                | Polar                          | 2.94E-02*             | 1.50E-03   | <.001 | 2.52E-02                | 3.36E-02    |
|                                | Granular                       | -1.39E-02*            | 1.61E-03   | <.001 | -1.83E-02               | -9.35E-03   |
| Polar                          | Agranular                      | -1.59E-02*            | 1.68E-03   | <.001 | -2.06E-02               | -1.12E-02   |
|                                | Frontal                        | -1.70E-02*            | 1.45E-03   | <.001 | -2.10E-02               | -1.29E-02   |
|                                | Parietal                       | -2.94E-02*            | 1.50E-03   | <.001 | -3.36E-02               | -2.52E-02   |
|                                | Granular                       | -4.32E-02*            | 1.91E-03   | <.001 | -4.86E-02               | -3.79E-02   |
| Granular                       | Agranular                      | 2.74E-02*             | 1.78E-03   | <.001 | 2.24E-02                | 3.23E-02    |
|                                | Frontal                        | 2.63E-02*             | 1.56E-03   | <.001 | 2.19E-02                | 3.06E-02    |
|                                | Parietal                       | 1.39E-02*             | 1.61E-03   | <.001 | 9.35E-03                | 1.83E-02    |
|                                | Polar                          | 4.32E-02*             | 1.91E-03   | <.001 | 3.79E-02                | 4.86E-02    |

\*. The mean difference is significant at the 0.05 level.

**Supplemental Table 26: Mean differences in structure-function coupling across the 5 von-Economo/Koskinas-inspired cyto-architectonic classes.** One-way ANOVA table with post-hoc correction for multiple comparisons (Tamhane's T2 – equal variances not assumed); Dependent variable: Structure-function coupling; factor: Cyto-architectonic classes. Data reported in each table column were averaged across the 9 subjects scanned at Penn that passed quality-control and analyzed using our voxel-based analysis approach; the *p*-values reported under the 'Sig.' column represent the combined *p<sub>fisher</sub>* value across the 9 subjects.

### Supplemental Table 27

#### Multiple Comparisons

Dependent Variable: Temporal Structure-Function Coupling Variance

Test: Tamhane

| Resting-state functional networks | Resting-state functional networks | Mean Difference (I-J) | Std. Error | Sig.  | 95% Confidence Interval |             |
|-----------------------------------|-----------------------------------|-----------------------|------------|-------|-------------------------|-------------|
|                                   |                                   |                       |            |       | Lower Bound             | Upper Bound |
| Visual                            | Somatomotor                       | -0.000152648*         | 4.7316E-05 | <.001 | -0.0002961              | -9.225E-06  |
|                                   | Dorsal Attention                  | 0.000929401*          | 4.3957E-05 | <.001 | 0.00079616              | 0.00106264  |
|                                   | Ventral Attention                 | 0.000527939*          | 4.9728E-05 | <.001 | 0.0003772               | 0.00067868  |
|                                   | Limbic                            | -0.000866467*         | 7.4769E-05 | <.001 | -0.0010931              | -0.0006398  |
|                                   | Fronto-parietal                   | -0.000511196*         | 5.8235E-05 | <.001 | -0.0006877              | -0.0003347  |
|                                   | Default Mode                      | -0.002924993*         | 6.4663E-05 | <.001 | -0.003121               | -0.002729   |
| Somatomotor                       | Visual                            | 0.000152648*          | 4.7316E-05 | <.001 | 9.2247E-06              | 0.00029607  |
|                                   | Dorsal Attention                  | 0.001082049*          | 4.488E-05  | <.001 | 0.00094601              | 0.00121809  |
|                                   | Ventral Attention                 | 0.000680587*          | 5.0361E-05 | <.001 | 0.00052793              | 0.00083324  |
|                                   | Limbic                            | -0.000713819*         | 7.4603E-05 | <.001 | -0.00094                | -0.0004877  |
|                                   | Fronto-parietal                   | -0.000358549*         | 5.8634E-05 | <.001 | -0.0005363              | -0.0001808  |
|                                   | Default Mode                      | -0.002772345*         | 6.4748E-05 | <.001 | -0.0029686              | -0.0025761  |
| Dorsal Attention                  | Visual                            | -0.000929401*         | 4.3957E-05 | <.001 | -0.0010626              | -0.0007962  |
|                                   | Somatomotor                       | -0.001082049*         | 4.488E-05  | <.001 | -0.0012181              | -0.000946   |
|                                   | Ventral Attention                 | -0.000401462*         | 4.7281E-05 | <.001 | -0.0005448              | -0.0002581  |
|                                   | Limbic                            | -0.001795868*         | 7.2694E-05 | <.001 | -0.0020163              | -0.0015755  |
|                                   | Fronto-parietal                   | -0.001440597*         | 5.5968E-05 | <.001 | -0.0016103              | -0.0012709  |
|                                   | Default Mode                      | -0.003854394*         | 6.2442E-05 | <.001 | -0.0040437              | -0.0036651  |
| Ventral Attention                 | Visual                            | -0.000527939*         | 4.9728E-05 | <.001 | -0.0006787              | -0.0003772  |
|                                   | Somatomotor                       | -0.000680587*         | 5.0361E-05 | <.001 | -0.0008332              | -0.0005279  |
|                                   | Dorsal Attention                  | 0.000401462*          | 4.7281E-05 | <.001 | 0.00025814              | 0.00054479  |
|                                   | Limbic                            | -0.001394406*         | 7.5947E-05 | <.001 | -0.0016246              | -0.0011642  |
|                                   | Fronto-parietal                   | -0.001039135*         | 6.0139E-05 | <.001 | -0.0012214              | -0.0008568  |
|                                   | Default Mode                      | -0.003452932*         | 6.605E-05  | <.001 | -0.0036531              | -0.0032527  |
| Limbic                            | Visual                            | 0.000866467*          | 7.4769E-05 | <.001 | 0.00063979              | 0.00109314  |
|                                   | Somatomotor                       | 0.000713819*          | 7.4603E-05 | <.001 | 0.00048765              | 0.00093999  |
|                                   | Dorsal Attention                  | 0.001795868*          | 7.2694E-05 | <.001 | 0.00157548              | 0.00201625  |
|                                   | Ventral Attention                 | 0.001394406*          | 7.5947E-05 | <.001 | 0.00116417              | 0.00162464  |
|                                   | Fronto-parietal                   | 0.000355271*          | 8.1684E-05 | <.001 | 0.00010765              | 0.00060289  |
|                                   | Default Mode                      | -0.002058526*         | 8.5938E-05 | <.001 | -0.002319               | -0.001798   |
| Fronto-parietal                   | Visual                            | 0.000511196*          | 5.8235E-05 | <.001 | 0.00033467              | 0.00068772  |
|                                   | Somatomotor                       | 0.000358549*          | 5.8634E-05 | <.001 | 0.00018081              | 0.00053628  |
|                                   | Dorsal Attention                  | 0.001440597*          | 5.5968E-05 | <.001 | 0.00127094              | 0.00161025  |
|                                   | Ventral Attention                 | 0.001039135*          | 6.0139E-05 | <.001 | 0.00085684              | 0.00122143  |
|                                   | Limbic                            | -0.000355271*         | 8.1684E-05 | <.001 | -0.0006029              | -0.0001077  |

|              |                   |               |            |       |            |            |
|--------------|-------------------|---------------|------------|-------|------------|------------|
|              | Default Mode      | -0.002413797* | 7.2447E-05 | <.001 | -0.0026334 | -0.0021942 |
| Default Mode | Visual            | 0.002924993*  | 6.4663E-05 | <.001 | 0.00272899 | 0.00312099 |
|              | Somatomotor       | 0.002772345*  | 6.4748E-05 | <.001 | 0.00257609 | 0.0029686  |
|              | Dorsal Attention  | 0.003854394*  | 6.2442E-05 | <.001 | 0.00366513 | 0.00404366 |
|              | Ventral Attention | 0.003452932*  | 6.605E-05  | <.001 | 0.00325273 | 0.00365314 |
|              | Limbic            | 0.002058526*  | 8.5938E-05 | <.001 | 0.00179802 | 0.00231903 |
|              | Fronto-parietal   | 0.002413797*  | 7.2447E-05 | <.001 | 0.0021942  | 0.00263339 |

\*. The mean difference is significant at the 0.05 level.

**Supplemental Table 27: Mean differences in temporal structure-function coupling variance across the 7 resting-state functional networks.** One-way ANOVA table with post-hoc correction for multiple comparisons (Tamhane's T2 – equal variances not assumed); Dependent variable: Temporal structure-function coupling variance; factor: Resting-state functional networks. Data reported in each table column were averaged across the 9 subjects scanned at Penn that passed quality-control and analyzed using our voxel-based analysis approach; the *p*-values reported under the 'Sig.' column represent the combined *p*<sub>fisher</sub> value across the 9 subjects.

## Supplemental Table 28

### Multiple Comparisons

Dependent Variable: Temporal Structure-Function Coupling Variance

Test: Tamhane

| (I) Cyto-architectonic classes | (J) Cyto-architectonic classes | Mean Difference (I-J) | Std. Error | Sig.  | 95% Confidence Interval |             |
|--------------------------------|--------------------------------|-----------------------|------------|-------|-------------------------|-------------|
|                                |                                |                       |            |       | Lower Bound             | Upper Bound |
| Agranular                      | Frontal                        | -0.001311816*         | 5.1232E-05 | <.001 | -0.0014553              | -0.0011684  |
|                                | Parietal                       | -0.000154774*         | 4.8352E-05 | <.001 | -0.0002902              | -1.939E-05  |
|                                | Polar                          | -0.000709449*         | 7.4163E-05 | <.001 | -0.0009171              | -0.0005018  |
|                                | Granular                       | -0.00055056*          | 6.0604E-05 | <.001 | -0.0007203              | -0.0003809  |
| Frontal                        | Agranular                      | 0.001311816*          | 5.1232E-05 | <.001 | 0.00116838              | 0.00145526  |
|                                | Parietal                       | 0.001157042*          | 4.7188E-05 | <.001 | 0.00102493              | 0.00128916  |
|                                | Polar                          | 0.000602367*          | 7.3586E-05 | <.001 | 0.0003963               | 0.00080844  |
|                                | Granular                       | 0.000761256*          | 6.0206E-05 | <.001 | 0.00059267              | 0.00092984  |
| Parietal                       | Agranular                      | 0.000154774*          | 4.8352E-05 | <.001 | 1.9395E-05              | 0.00029015  |
|                                | Frontal                        | -0.001157042*         | 4.7188E-05 | <.001 | -0.0012892              | -0.0010249  |
|                                | Polar                          | -0.000554676*         | 7.1277E-05 | <.001 | -0.0007543              | -0.0003551  |
|                                | Granular                       | -0.000395786*         | 5.7478E-05 | <.001 | -0.0005567              | -0.0002348  |
| Polar                          | Agranular                      | 0.000709449*          | 7.4163E-05 | <.001 | 0.00050176              | 0.00091714  |
|                                | Frontal                        | -0.000602367*         | 7.3586E-05 | <.001 | -0.0008084              | -0.0003963  |
|                                | Parietal                       | 0.000554676*          | 7.1277E-05 | <.001 | 0.00035507              | 0.00075429  |
|                                | Granular                       | 0.000158889*          | 8.0076E-05 | <.001 | -6.535E-05              | 0.00038313  |



|          |           |               |            |       |            |            |
|----------|-----------|---------------|------------|-------|------------|------------|
| Granular | Agranular | 0.00055056*   | 6.0604E-05 | <.001 | 0.00038085 | 0.00072027 |
|          | Frontal   | -0.000761256* | 6.0206E-05 | <.001 | -0.0009298 | -0.0005927 |
|          | Parietal  | 0.000395786*  | 5.7478E-05 | <.001 | 0.00023483 | 0.00055674 |
|          | Polar     | -0.000158889* | 8.0076E-05 | <.001 | -0.0003831 | 6.5352E-05 |

\*. The mean difference is significant at the 0.05 level.

**Supplemental Table 28: Mean differences in temporal structure-function coupling variance across the 5 von-Economo/Koskinas-inspired cyto-architectonic classes.** One-way ANOVA table with post-hoc correction for multiple comparisons (Tamhane's T2 – equal variances not assumed): Dependent variable: Temporal structure-function coupling variance; factor: Cyto-architectonic classes. Data reported in each table column were averaged across the 9 subjects scanned at Penn that passed quality-control and analyzed using our voxel-based analysis approach; the *p*-values reported under the 'Sig.' column represent the combined *p*<sub>fisher</sub> value across the 9 subjects.

# FIGURES

## Supplemental Figure 1

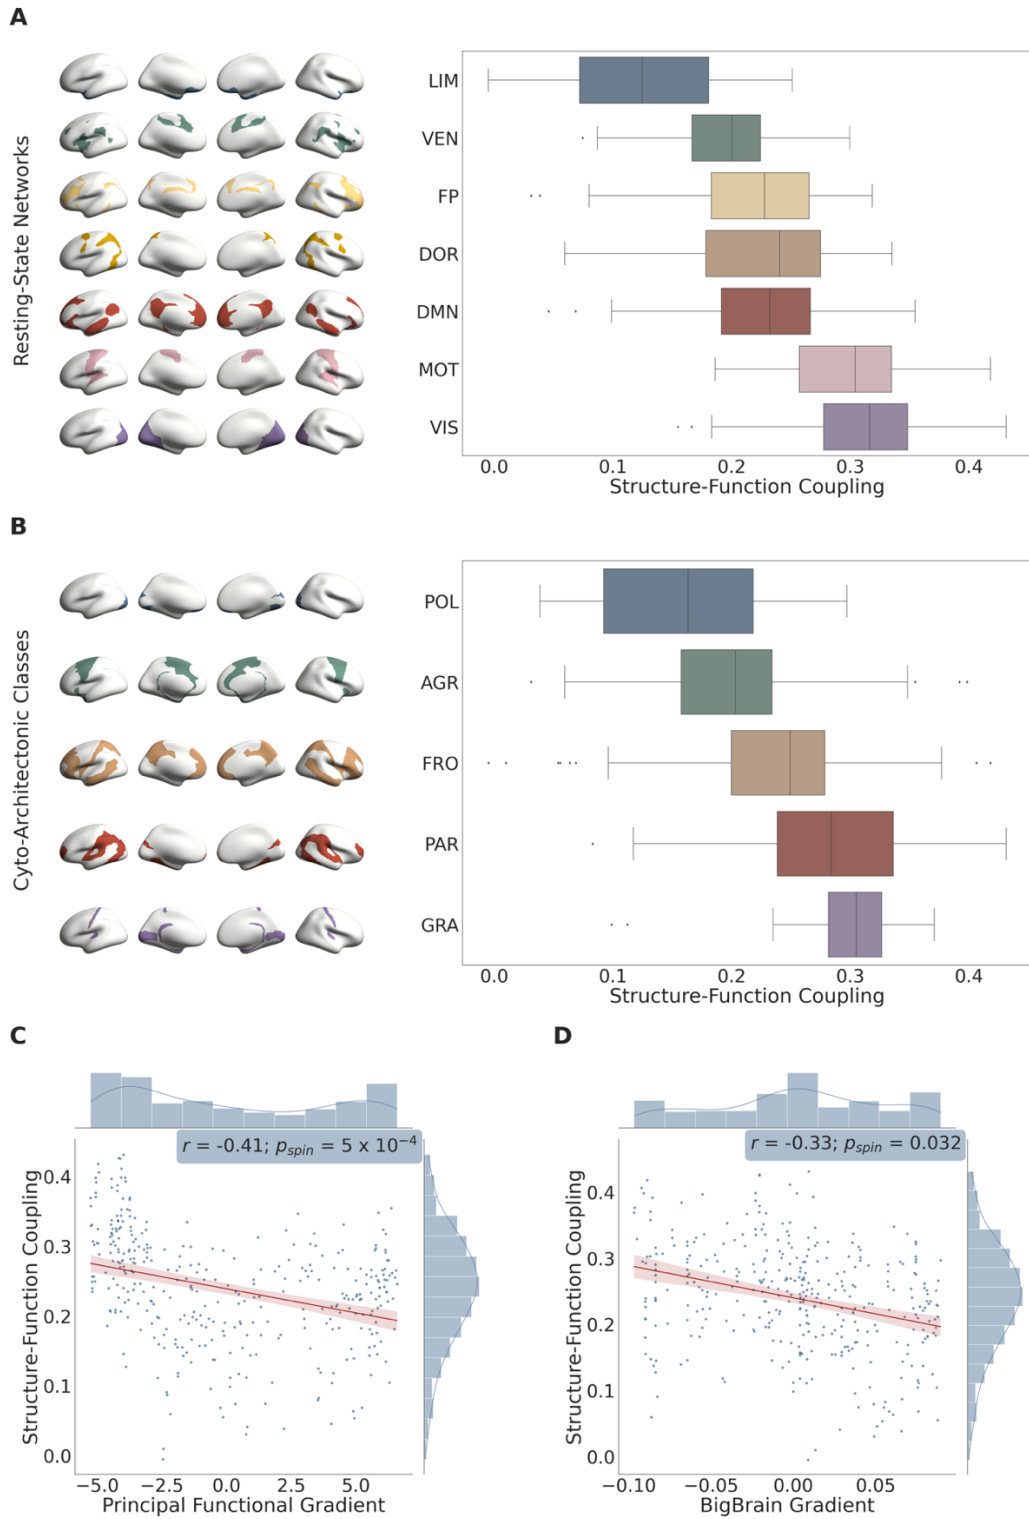

**Supplemental Figure 1 – Regional variations in structure-function coupling: atlas-based analysis.**

**A:** Mean differences in structure-function coupling across the 7 resting-state functional systems (generated using the 100 unrelated HCP subjects and HCP multi-modal atlas;  $n=360$  brain regions/datapoints). Data are presented as boxplots (median value at center line, lower quartile at left bound, upper quartile at right bound) with whiskers extending towards the minimum and maximum non-outlier values of the data; single datapoints denote outliers. The brain regions in each functional system are overlaid on the standardized *fsaverage* brain's surface and illustrated on the left side. LIM: Limbic, VEN: Ventral Attention, FP: Fronto-Parietal, DMN: Default Mode Network, DOR: Dorsal Attention, MOT: Somatomotor, VIS: Visual. **B:** Mean differences in structure-function coupling across the 5 cyto-architectonic classes (generated using the 100 unrelated HCP subjects and HCP multi-modal atlas;  $n=360$  brain regions/datapoints). Data are presented as boxplots (median value at center line, lower quartile at left bound, upper quartile at right bound) with whiskers extending towards the minimum and maximum non-outlier values of the data; single datapoints denote outliers. The brain regions involved within each class are overlaid on the standardized *fsaverage* brain's surface and illustrated on the left side. POL: Polar, AGR: Agranular, FRO: Frontal, PAR: Parietal, GRA: Granular. **C:** Scatterplot between the principal functional gradient scalar of each brain region and its corresponding structure-function coupling ( $n=360$  brain regions/datapoints). A linear regression was fit along with a 95% confidence interval (shown in red); the correlation coefficient (two-tailed Spearman's  $\rho$ :  $r$ ),  $p$ -value corresponding to the spatial permutation test ( $p_{spin}$ ), and histograms corresponding to each variable are reported. **D:** Scatterplot between the "BigBrain" gradient scalar of each brain region and its corresponding structure-function coupling ( $n=360$  brain regions/datapoints). A linear regression was fit along with a 95% confidence interval (shown in red); the correlation coefficient (two-tailed Spearman's  $\rho$ :  $r$ ),  $p$ -value corresponding to the spatial permutation test ( $p_{spin}$ ), and histograms corresponding to each variable are reported. Source data are provided as a Source Data file.

## Supplemental Figure 2

**A**

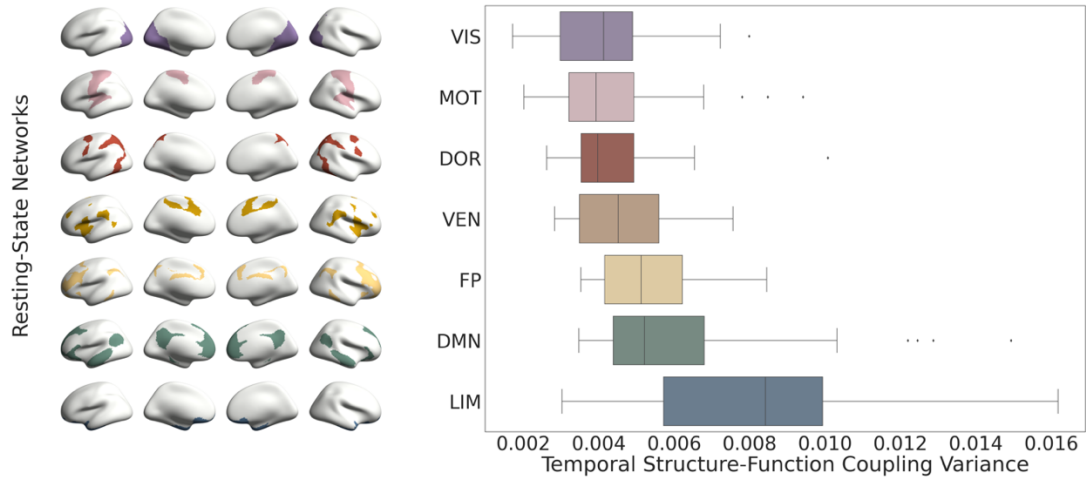

**B**

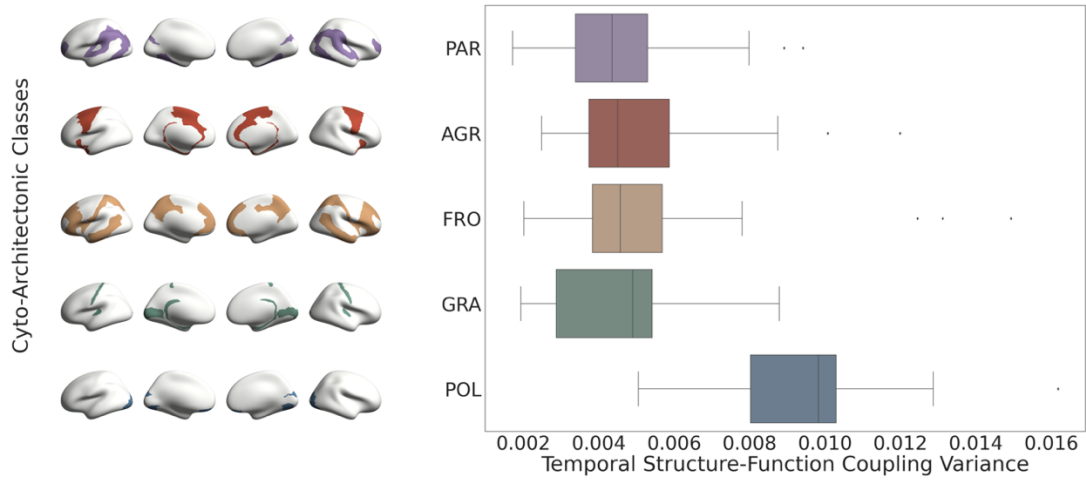

**C**

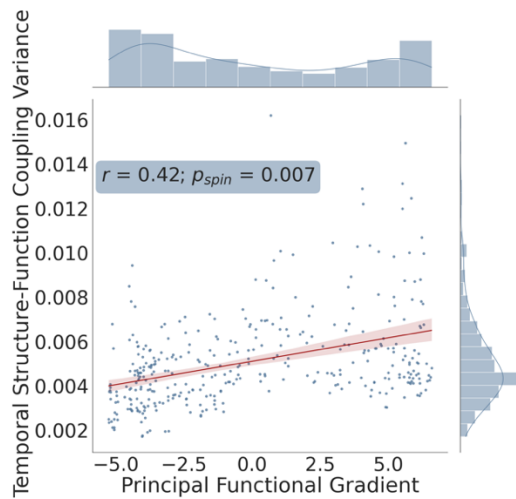

**D**

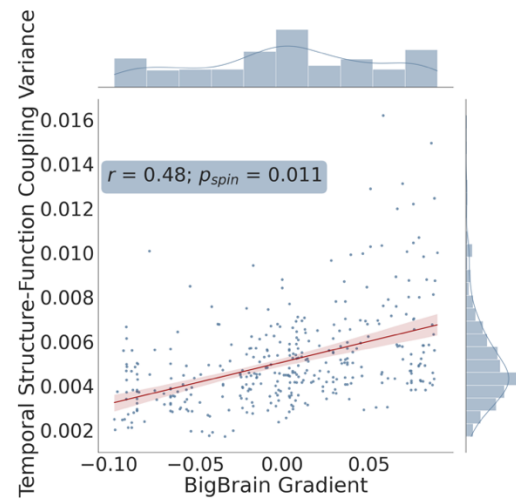

**Supplemental Figure 2 – Regional variations in temporal structure-function coupling variance: atlas-based analysis.**

**A:** Mean differences in temporal structure-function coupling variance across the 7 resting-state functional systems (generated using the 100 unrelated HCP subjects and HCP multi-modal atlas;  $n=360$  brain regions/datapoints). Data are presented as boxplots (median value at center line, lower quartile at left bound, upper quartile at right bound) with whiskers extending towards the minimum and maximum non-outlier values of the data; single datapoints denote outliers. The brain regions involved within each functional system are overlaid on the standardized *fsaverage* brain's surface and illustrated on the left side. DOR: Dorsal Attention, VIS: Visual, MOT: Somatomotor, VEN: Ventral Attention, FP: Fronto-Parietal, DMN: Default Mode Network, LIM: Limbic. **B:** Mean differences in temporal structure-function coupling variance across the 5 cyto-architectonic classes (generated using the 100 unrelated HCP subjects and HCP multi-modal atlas;  $n=360$  brain regions/datapoints). Data are presented as boxplots (median value at center line, lower quartile at left bound, upper quartile at right bound) with whiskers extending towards the minimum and maximum non-outlier values of the data; single datapoints denote outliers. The brain regions involved within each class are overlaid on the standardized *fsaverage* brain's surface and illustrated on the left side. PAR: Parietal, AGR: Agranular, FRO: Frontal, GRA: Granular, POL: Polar. **C:** Scatterplot between the principal functional gradient scalar of each brain region and its corresponding temporal structure-function coupling variance ( $n=360$  brain regions/datapoints). A linear regression was fit along with a 95% confidence interval (shown in red); the correlation coefficient (two-tailed Spearman's  $\rho$ :  $r$ ),  $p$ -value corresponding to the spatial permutation test ( $p_{spin}$ ), and histograms corresponding to each variable are reported. **D:** Scatterplot between the "BigBrain" gradient scalar of each brain region and its corresponding temporal structure-function coupling variance ( $n=360$  brain regions/datapoints). A linear regression was fit along with a 95% confidence interval (shown in red); the correlation coefficient (two-tailed Spearman's  $\rho$ :  $r$ ),  $p$ -value corresponding to the spatial permutation test ( $p_{spin}$ ), and histograms corresponding to each variable are reported. Source data are provided as a Source Data file.

### Supplemental Figure 3

**A**

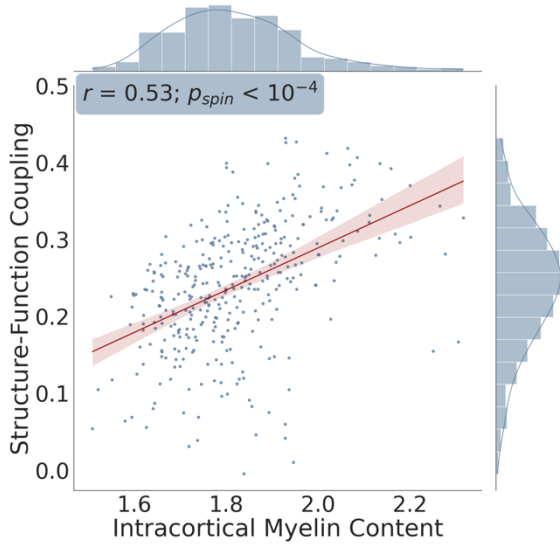

**B**

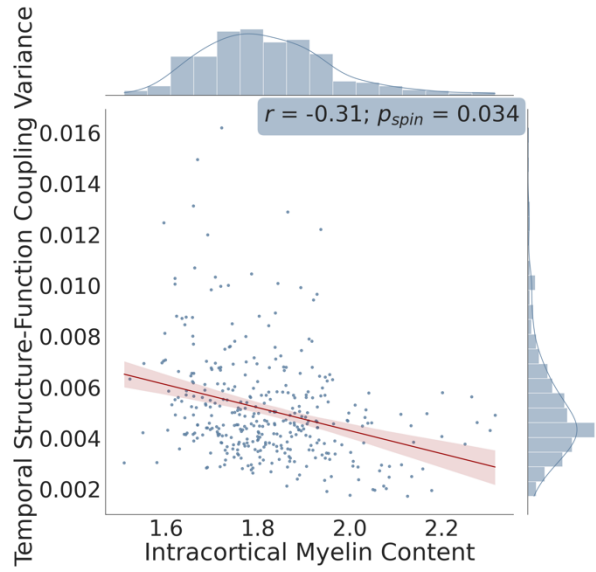

**C**

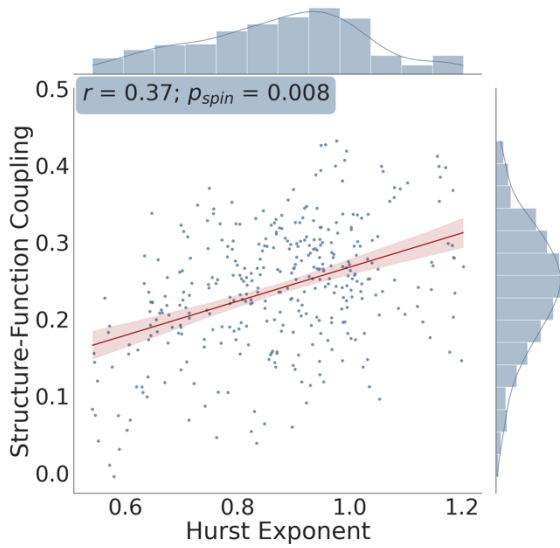

**D**

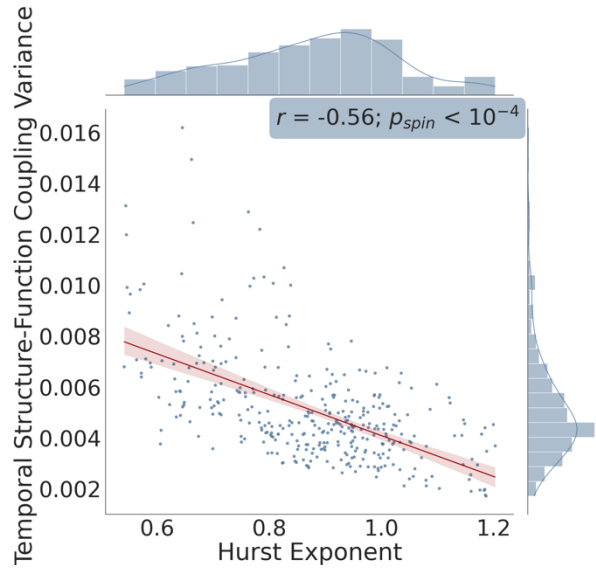

**Supplemental Figure 3 – Scatterplots between the variables of interest: atlas-based analysis.**

Scatterplot showing the association between each brain region's: mean structure-function coupling and intracortical myelin content as estimated by the T1-weighted/T2-weighted signal intensity ratio (**A**), mean temporal structure-function coupling variance and intracortical myelin content (**B**), mean structure-function coupling and the Hurst exponent of the functional signal time series (**C**), and mean temporal structure-function coupling variance and the Hurst exponent of the functional signal time series (**D**). For each scatterplot, a linear regression was fit along with a 95% confidence interval (shown in red); correlation coefficients (two-tailed Spearman's  $\rho: r$ ),  $p$ -values corresponding to the spatial permutation test ( $p_{spin}$ ), and histograms corresponding to each variable are displayed. Note:  $n=360$  brain regions in all panels. Source data are provided as a Source Data file.

# Supplemental Figure 4

**A**

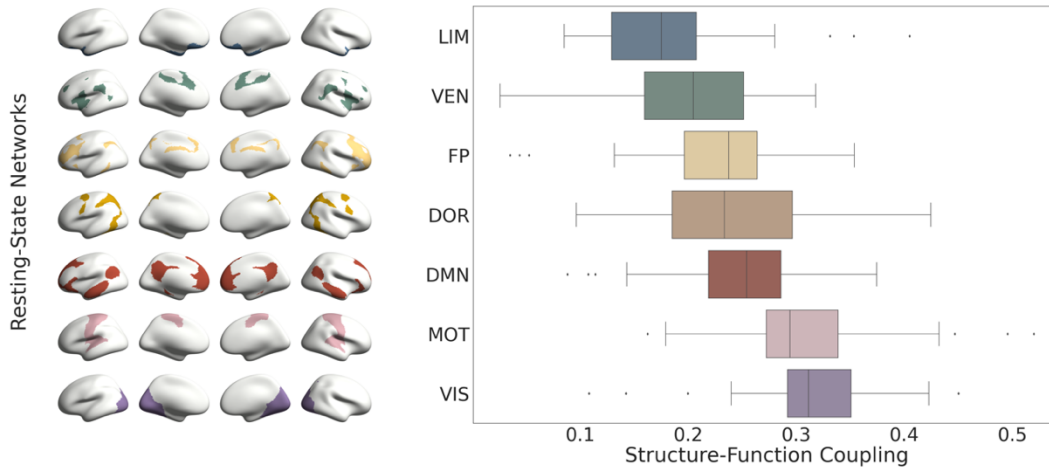

**B**

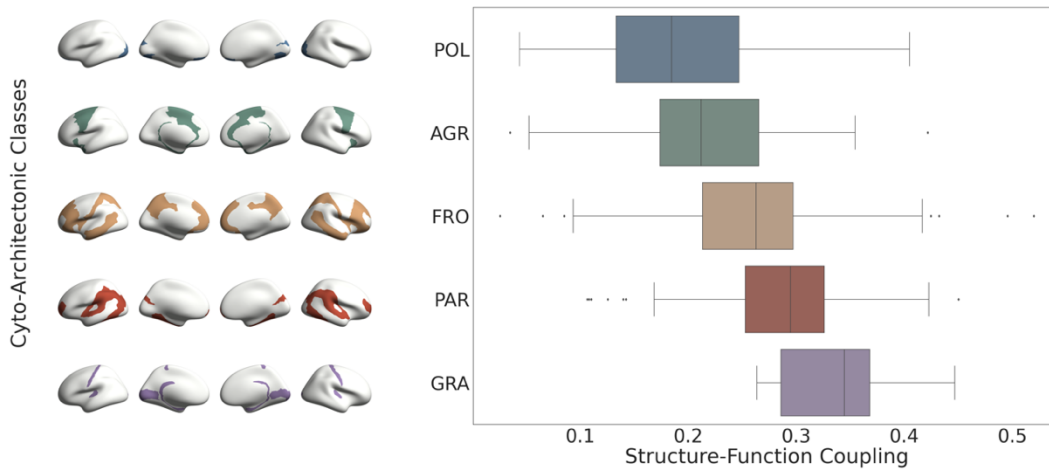

**C**

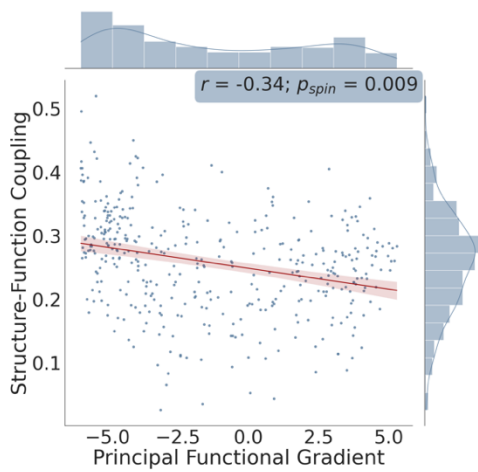

**D**

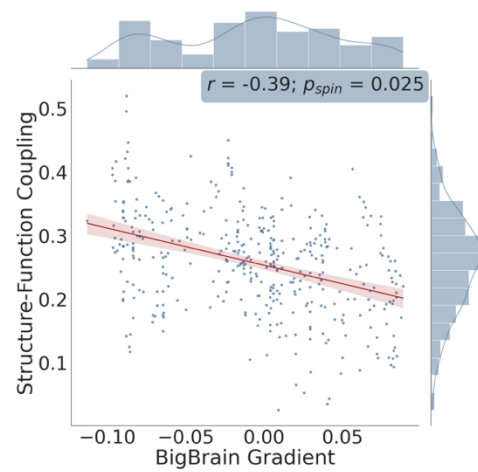



**Supplemental Figure 4 – Regional variations in structure-function coupling: atlas-based analysis.**

**A:** Mean differences in structure-function coupling across the 7 resting-state functional systems (generated using the 100 unrelated HCP subjects and Schaefer 400 atlas;  $n=400$  brain regions/datapoints). Data are presented as boxplots (median value at center line, lower quartile at left bound, upper quartile at right bound) with whiskers extending towards the minimum and maximum non-outlier values of the data; single datapoints denote outliers. The brain regions in each functional system are overlaid on the standardized *fsaverage* brain's surface and illustrated on the left side. LIM: Limbic, VEN: Ventral Attention, FP: Fronto-Parietal, DMN: Default Mode Network, DOR: Dorsal Attention, MOT: Somatomotor, VIS: Visual. **B:** Mean differences in structure-function coupling across the 5 cyto-architectonic classes (generated using the 100 unrelated HCP subjects and Schaefer 400 atlas;  $n=400$  brain regions/datapoints). Data are presented as boxplots (median value at center line, lower quartile at left bound, upper quartile at right bound) with whiskers extending towards the minimum and maximum non-outlier values of the data; single datapoints denote outliers. The brain regions involved within each class are overlaid on the standardized *fsaverage* brain's surface and illustrated on the left side. POL: Polar, AGR: Agranular, FRO: Frontal, PAR: Parietal, GRA: Granular. **C:** Scatterplot between the principal functional gradient scalar of each brain region and its corresponding structure-function coupling ( $n=400$  brain regions/datapoints). A linear regression was fit along with a 95% confidence interval (shown in red); the correlation coefficient (two-tailed Spearman's  $\rho: r$ ),  $p$ -value corresponding to the spatial permutation test ( $p_{spin}$ ), and histograms corresponding to each variable are reported. **D:** Scatterplot between the "BigBrain" gradient scalar of each brain region and its corresponding structure-function coupling ( $n=400$  brain regions/datapoints). A linear regression was fit along with a 95% confidence interval (shown in red); the correlation coefficient (two-tailed Spearman's  $\rho: r$ ),  $p$ -value corresponding to the spatial permutation test ( $p_{spin}$ ), and histograms corresponding to each variable are reported. Source data are provided as a Source Data file.

## Supplemental Figure 5

**A**

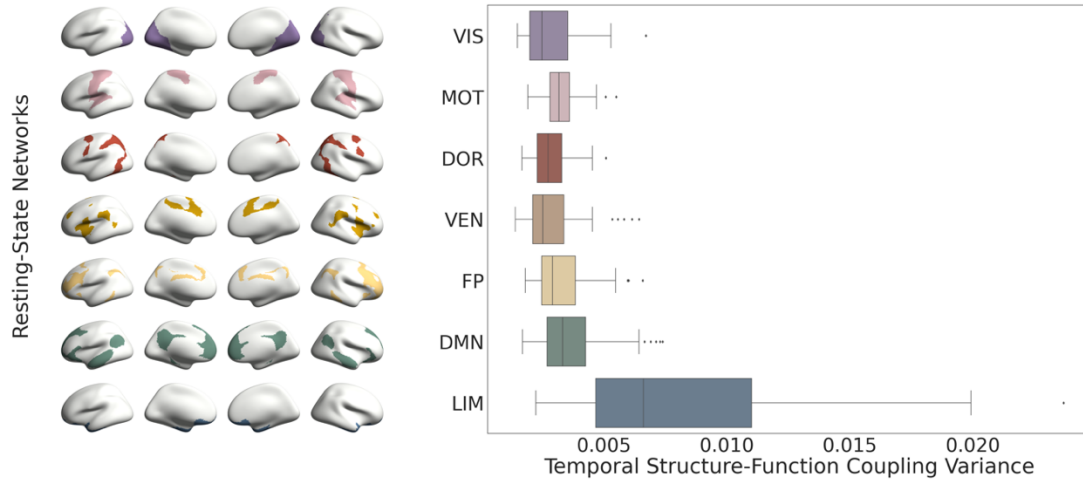

**B**

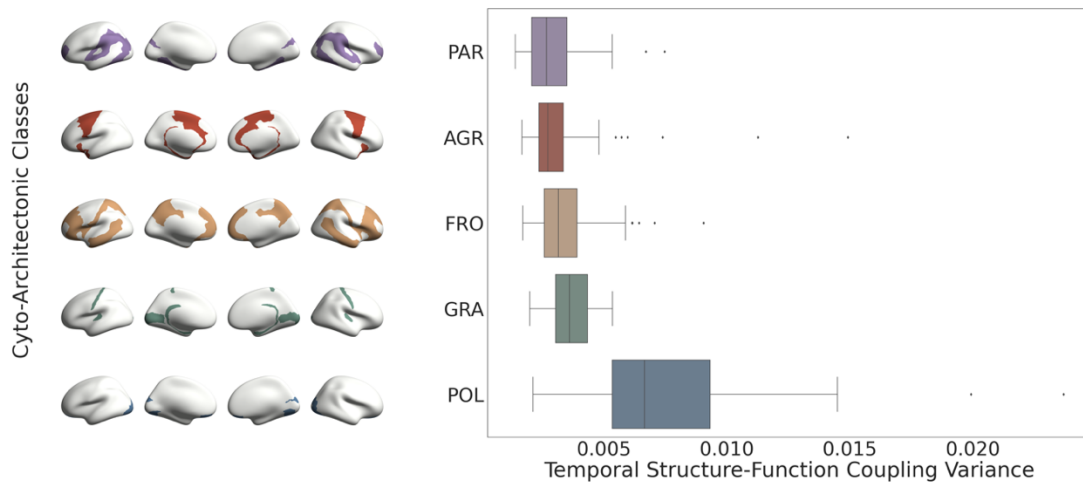

**C**

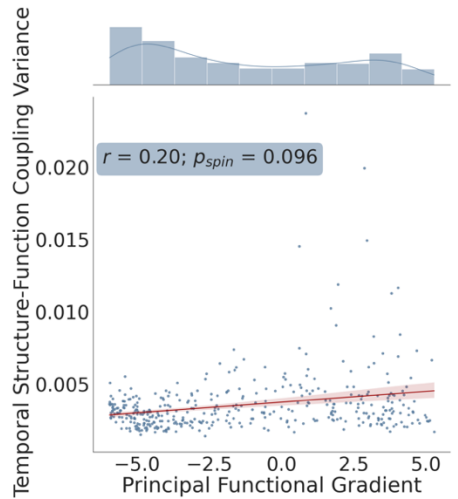

**D**

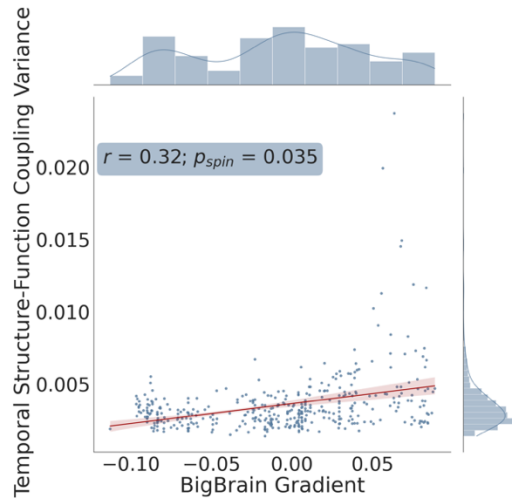

**Supplemental Figure 5 – Regional variations in temporal structure-function coupling variance: atlas-based analysis.**

**A:** Mean differences in temporal structure-function coupling variance across the 7 resting-state functional systems (generated using the 100 unrelated HCP subjects and Schaefer 400 atlas;  $n=400$  brain regions/datapoints). Data are presented as boxplots (median value at center line, lower quartile at left bound, upper quartile at right bound) with whiskers extending towards the minimum and maximum non-outlier values of the data; single datapoints denote outliers. The brain regions involved within each functional system are overlaid on the standardized *fsaverage* brain's surface and illustrated on the left side. DOR: Dorsal Attention, VIS: Visual, MOT: Somatomotor, VEN: Ventral Attention, FP: Fronto-Parietal, DMN: Default Mode Network, LIM: Limbic. **B:** Mean differences in temporal structure-function coupling variance across the 5 cyto-architectonic classes (generated using the 100 unrelated HCP subjects and Schaefer 400 atlas;  $n=400$  brain regions/datapoints). Data are presented as boxplots (median value at center line, lower quartile at left bound, upper quartile at right bound) with whiskers extending towards the minimum and maximum non-outlier values of the data; single datapoints denote outliers. The brain regions involved within each class are overlaid on the standardized *fsaverage* brain's surface and illustrated on the left side. PAR: Parietal, AGR: Agranular, FRO: Frontal, GRA: Granular, POL: Polar. **C:** Scatterplot between the principal functional gradient scalar of each brain region and its corresponding temporal structure-function coupling variance ( $n=400$  brain regions/datapoints). A linear regression was fit along with a 95% confidence interval (shown in red); the correlation coefficient (two-tailed Spearman's  $\rho$ :  $r$ ),  $p$ -value corresponding to the spatial permutation test ( $p_{spin}$ ), and histograms corresponding to each variable are reported. **D:** Scatterplot between the "BigBrain" gradient scalar of each brain region and its corresponding temporal structure-function coupling variance ( $n=400$  brain regions/datapoints). A linear regression was fit along with a 95% confidence interval (shown in red); the correlation coefficient (two-tailed Spearman's  $\rho$ :  $r$ ),  $p$ -value corresponding to the spatial permutation test ( $p_{spin}$ ), and histograms corresponding to each variable are reported. Source data are provided as a Source Data file.

## Supplemental Figure 6

**A**

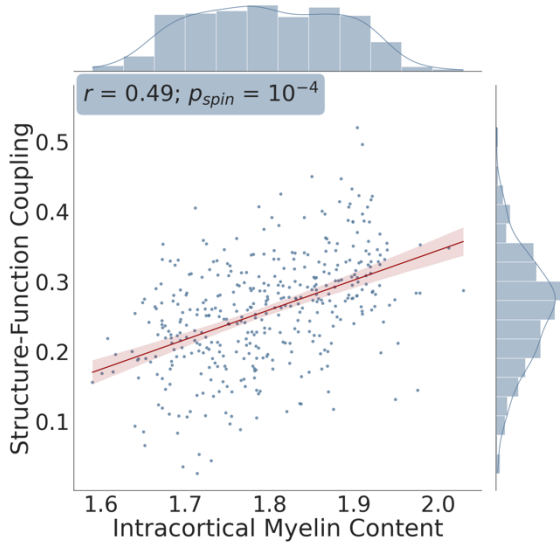

**B**

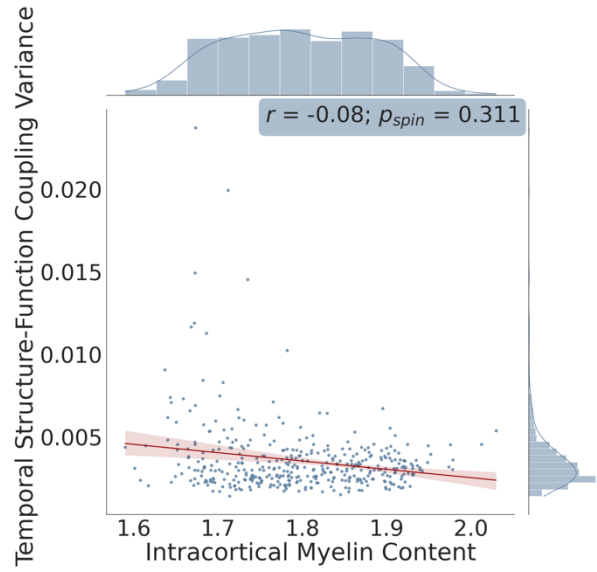

**C**

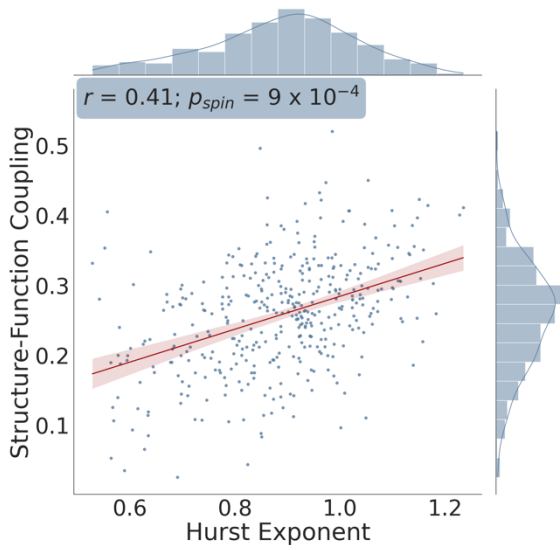

**D**

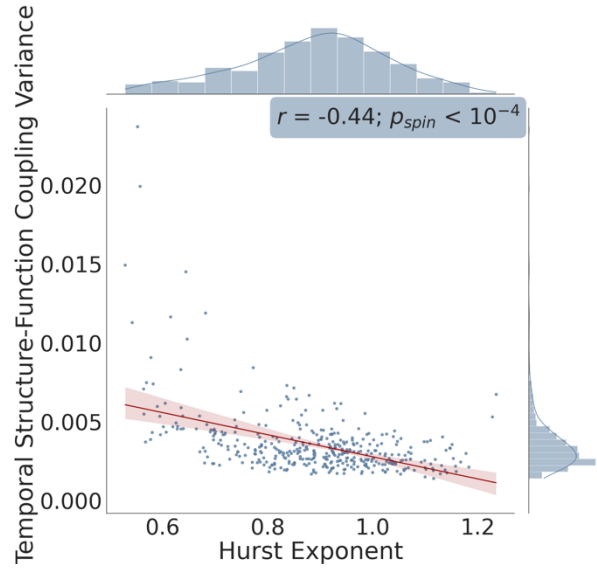

**Supplemental Figure 6 – Scatterplots between the variables of interest: atlas-based analysis.**

Scatterplot showing the association between each brain region's: mean structure-function coupling and intracortical myelin content as estimated by the T1-weighted/T2-weighted signal intensity ratio (**A**), mean temporal structure-function coupling variance and intracortical myelin content (**B**), mean structure-function coupling and the Hurst exponent of the functional signal time series (**C**), and mean temporal structure-function coupling variance and the Hurst exponent of the functional signal time series (**D**). For each scatterplot, a linear regression was fit along with a 95% confidence interval (shown in red); correlation coefficients (two-tailed Spearman's  $\rho: r$ ),  $p$ -values corresponding to the spatial permutation test ( $p_{spin}$ ), and histograms corresponding to each variable are displayed. Note:  $n=400$  brain regions in all panels. Source data are provided as a Source Data file.

# Supplemental Figure 7

**A**

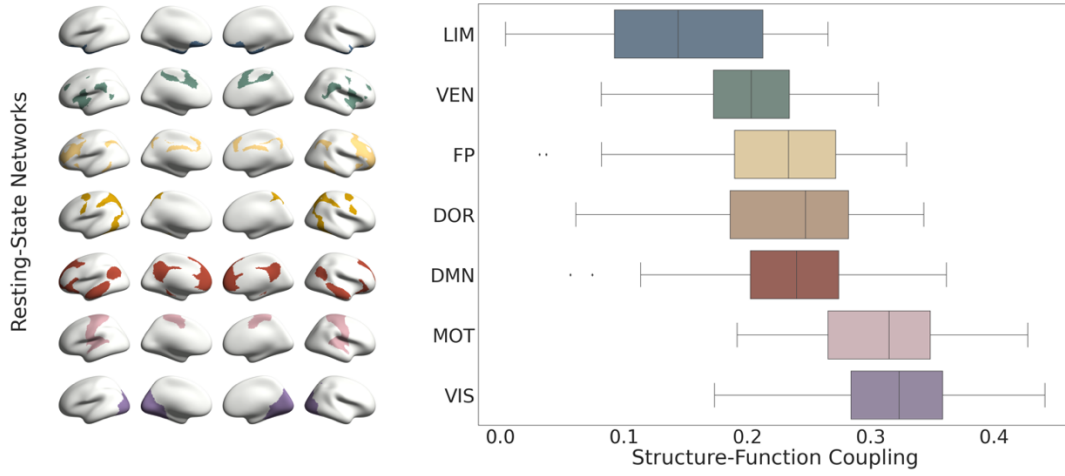

**B**

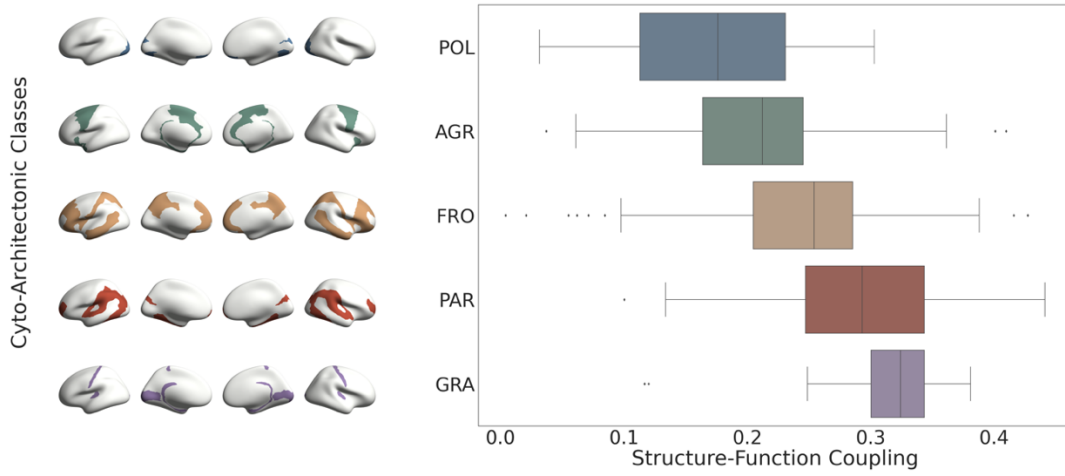

**C**

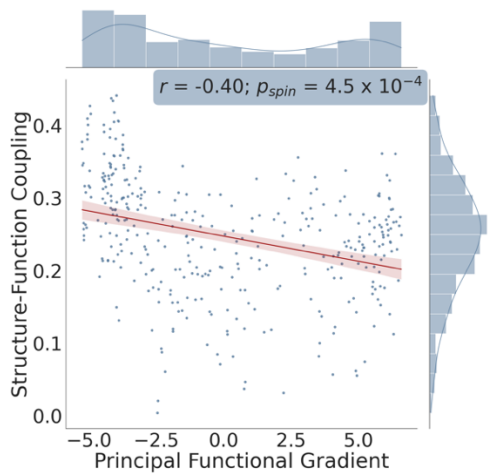

**D**

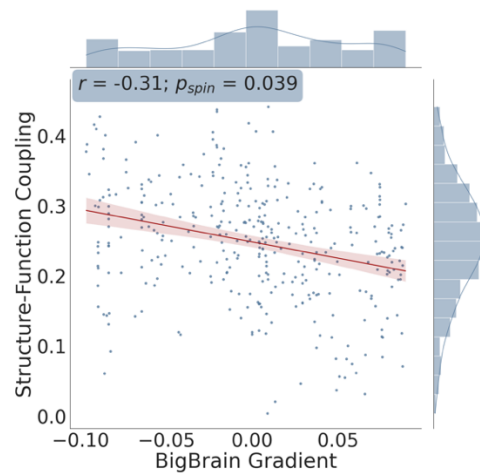

**Supplemental Figure 7 – Regional variations in structure-function coupling: atlas-based analysis.**

**A:** Mean differences in structure-function coupling across the 7 resting-state functional systems (generated using the 100 unrelated HCP subjects and HCP multi-modal atlas;  $n=360$  brain regions/datapoints). Data are presented as boxplots (median value at center line, lower quartile at left bound, upper quartile at right bound) with whiskers extending towards the minimum and maximum non-outlier values of the data; single datapoints denote outliers. The brain regions in each functional system are overlaid on the standardized *fsaverage* brain's surface and illustrated on the left side. LIM: Limbic, VEN: Ventral Attention, FP: Fronto-Parietal, DMN: Default Mode Network, DOR: Dorsal Attention, MOT: Somatomotor, VIS: Visual. **B:** Mean differences in structure-function coupling across the 5 cyto-architectonic classes (generated using the 100 unrelated HCP subjects and HCP multi-modal atlas;  $n=360$  brain regions/datapoints). Data are presented as boxplots (median value at center line, lower quartile at left bound, upper quartile at right bound) with whiskers extending towards the minimum and maximum non-outlier values of the data; single datapoints denote outliers. The brain regions involved within each class are overlaid on the standardized *fsaverage* brain's surface and illustrated on the left side. POL: Polar, AGR: Agranular, FRO: Frontal, PAR: Parietal, GRA: Granular. **C:** Scatterplot between the principal functional gradient scalar of each brain region and its corresponding structure-function coupling ( $n=360$  brain regions/datapoints). A linear regression was fit along with a 95% confidence interval (shown in red); the correlation coefficient (two-tailed Spearman's  $\rho$ :  $r$ ),  $p$ -value corresponding to the spatial permutation test ( $p_{spin}$ ), and histograms corresponding to each variable are reported. **D:** Scatterplot between the "BigBrain" gradient scalar of each brain region and its corresponding structure-function coupling ( $n=360$  brain regions/datapoints). A linear regression was fit along with a 95% confidence interval (shown in red); the correlation coefficient (two-tailed Spearman's  $\rho$ :  $r$ ),  $p$ -value corresponding to the spatial permutation test ( $p_{spin}$ ), and histograms corresponding to each variable are reported. Source data are provided as a Source Data file.

## Supplemental Figure 8

**A**

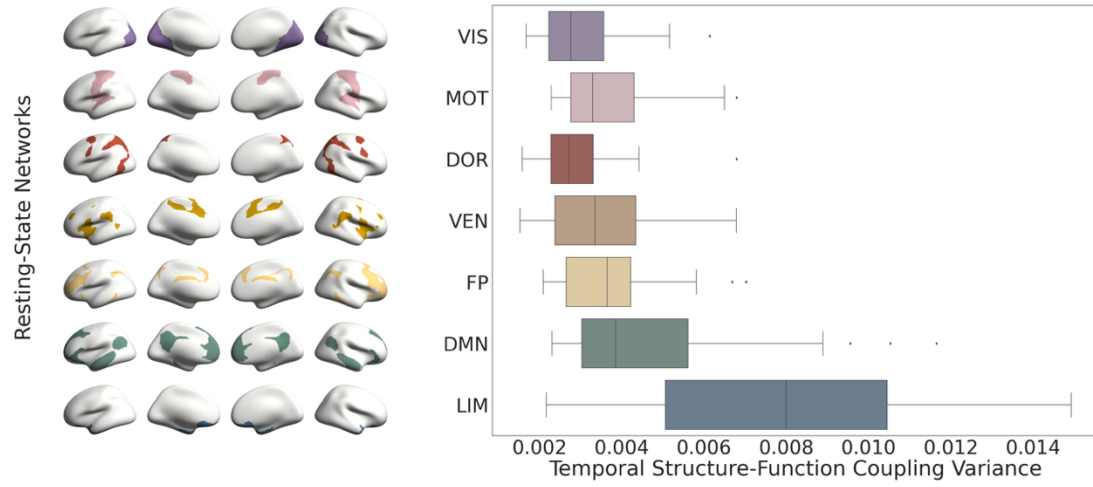

**B**

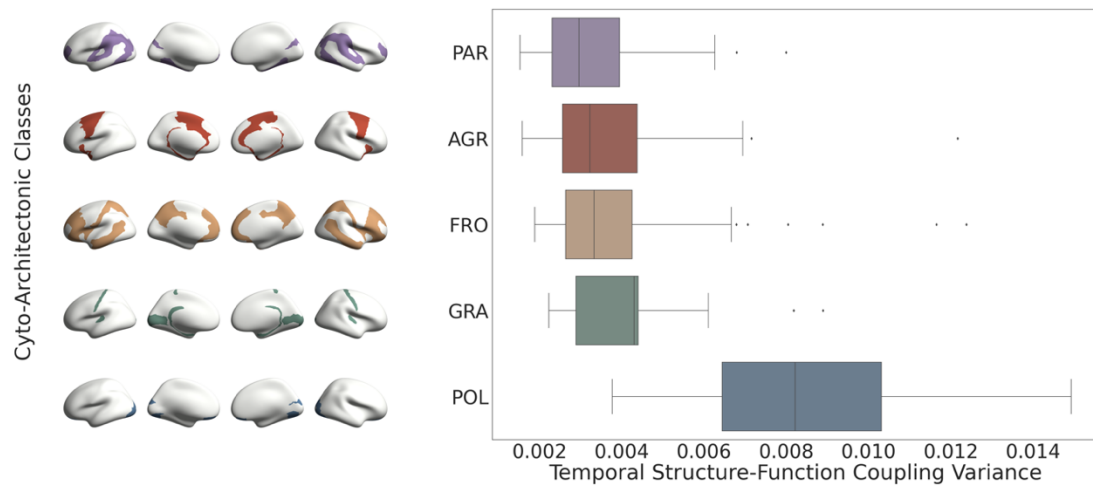

**C**

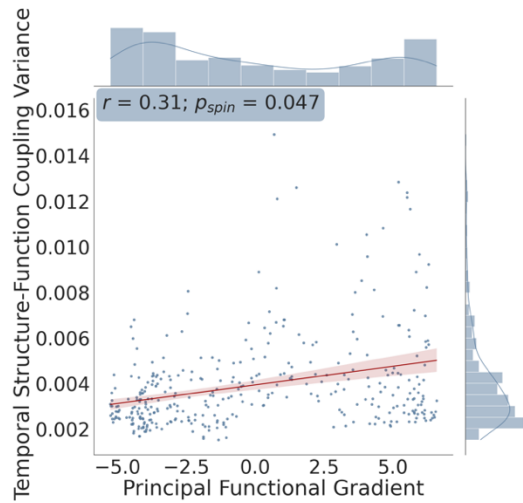

**D**

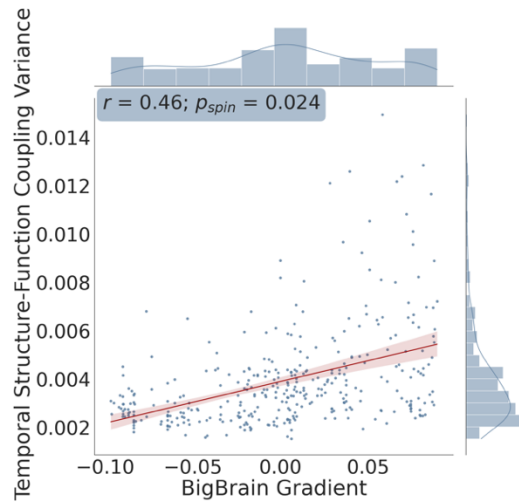



**Supplemental Figure 8 – Regional variations in temporal structure-function coupling variance: atlas-based analysis.**

**A:** Mean differences in temporal structure-function coupling variance across the 7 resting-state functional systems (generated using the 100 unrelated HCP subjects and HCP multi-modal atlas;  $n=360$  brain regions/datapoints). Data are presented as boxplots (median value at center line, lower quartile at left bound, upper quartile at right bound) with whiskers extending towards the minimum and maximum non-outlier values of the data; single datapoints denote outliers. The brain regions involved within each functional system are overlaid on the standardized *fsaverage* brain's surface and illustrated on the left side. DOR: Dorsal Attention, VIS: Visual, MOT: Somatomotor, VEN: Ventral Attention, FP: Fronto-Parietal, DMN: Default Mode Network, LIM: Limbic. **B:** Mean differences in temporal structure-function coupling variance across the 5 cyto-architectonic classes (generated using the 100 unrelated HCP subjects and HCP multi-modal atlas;  $n=360$  brain regions/datapoints). Data are presented as boxplots (median value at center line, lower quartile at left bound, upper quartile at right bound) with whiskers extending towards the minimum and maximum non-outlier values of the data; single datapoints denote outliers. The brain regions involved within each class are overlaid on the standardized *fsaverage* brain's surface and illustrated on the left side. PAR: Parietal, AGR: Agranular, FRO: Frontal, GRA: Granular, POL: Polar. **C:** Scatterplot between the principal functional gradient scalar of each brain region and its corresponding temporal structure-function coupling variance ( $n=360$  brain regions/datapoints). A linear regression was fit along with a 95% confidence interval (shown in red); the correlation coefficient (two-tailed Spearman's  $\rho$ :  $r$ ),  $p$ -value corresponding to the spatial permutation test ( $p_{spin}$ ), and histograms corresponding to each variable are reported. **D:** Scatterplot between the "BigBrain" gradient scalar of each brain region and its corresponding temporal structure-function coupling variance ( $n=360$  brain regions/datapoints). A linear regression was fit along with a 95% confidence interval (shown in red); the correlation coefficient (two-tailed Spearman's  $\rho$ :  $r$ ),  $p$ -value corresponding to the spatial permutation test ( $p_{spin}$ ), and histograms corresponding to each variable are reported. Source data are provided as a Source Data file.

## Supplemental Figure 9

**A**

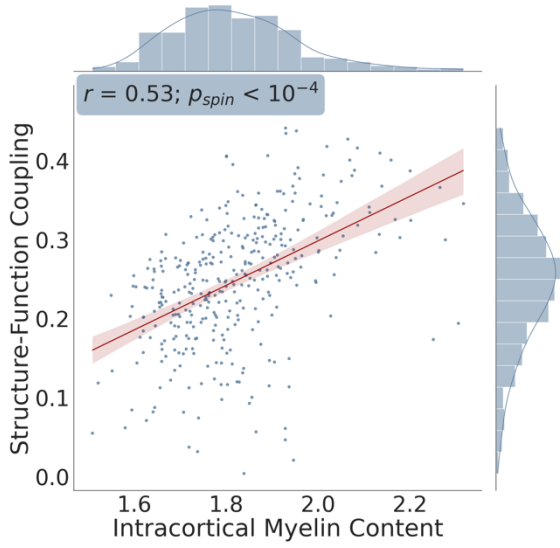

**B**

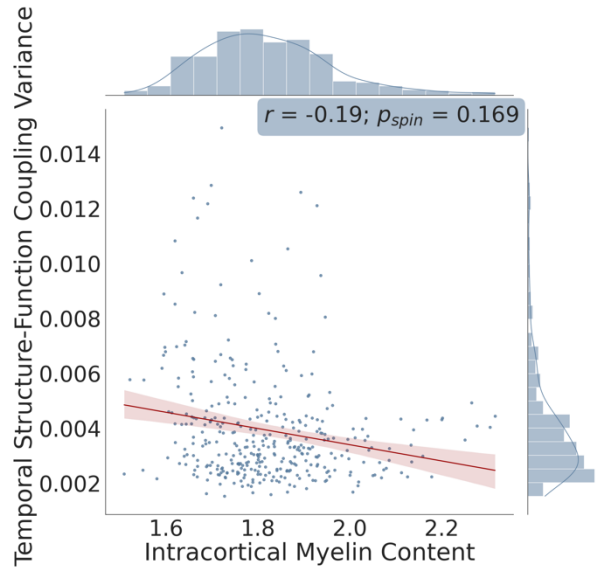

**C**

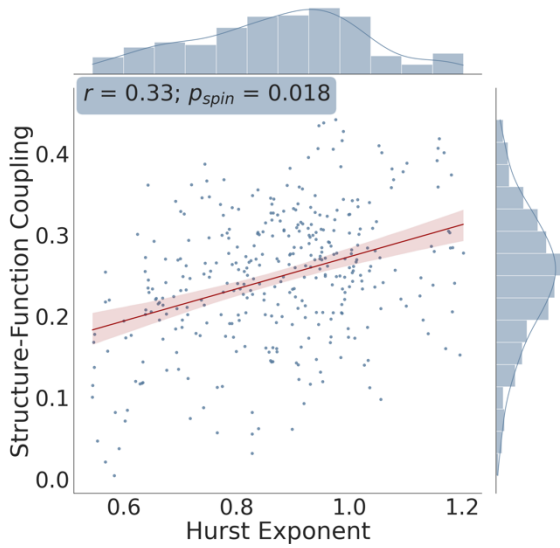

**D**

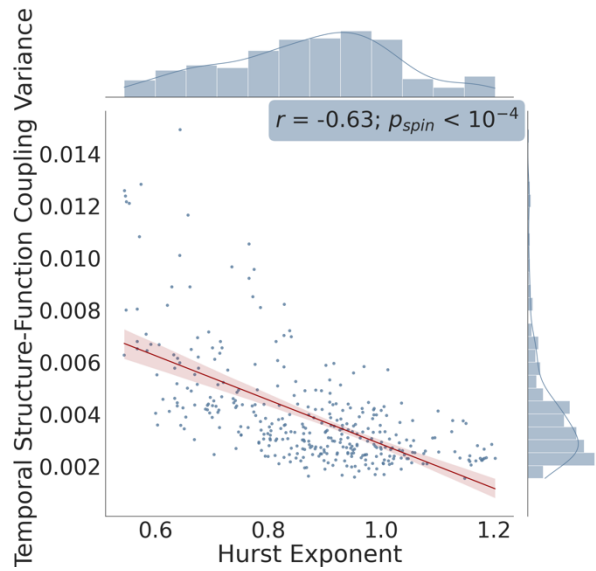

**Supplemental Figure 9 – Scatterplots between the variables of interest: atlas-based analysis.**

Scatterplot showing the association between each brain region's: mean structure-function coupling and intracortical myelin content as estimated by the T1-weighted/T2-weighted signal intensity ratio (**A**), mean temporal structure-function coupling variance and intracortical myelin content (**B**), mean structure-function coupling and the Hurst exponent of the functional signal time series (**C**), and mean temporal structure-function coupling variance and the Hurst exponent of the functional signal time series (**D**). For each scatterplot, a linear regression was fit along with a 95% confidence interval (shown in red); correlation coefficients (two-tailed Spearman's  $\rho: r$ ),  $p$ -values corresponding to the spatial permutation test ( $p_{spin}$ ), and histograms corresponding to each variable are displayed. Note:  $n=360$  brain regions in all panels. Source data are provided as a Source Data file.

# Supplemental Figure 10

**A**

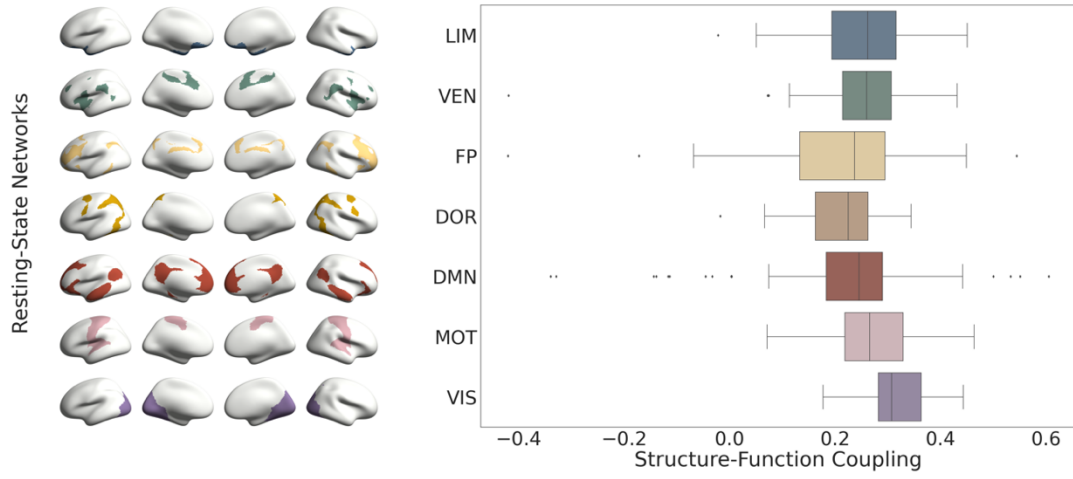

**B**

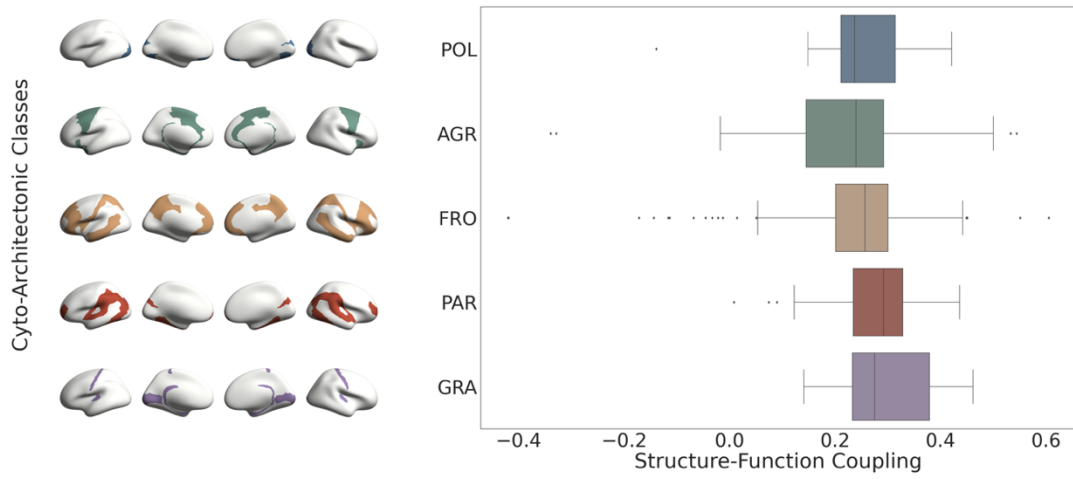

**C**

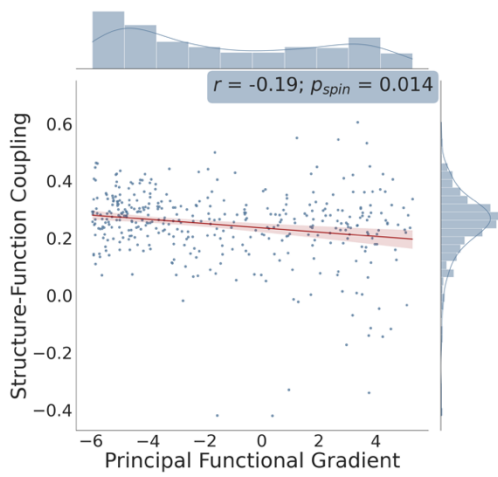

**D**

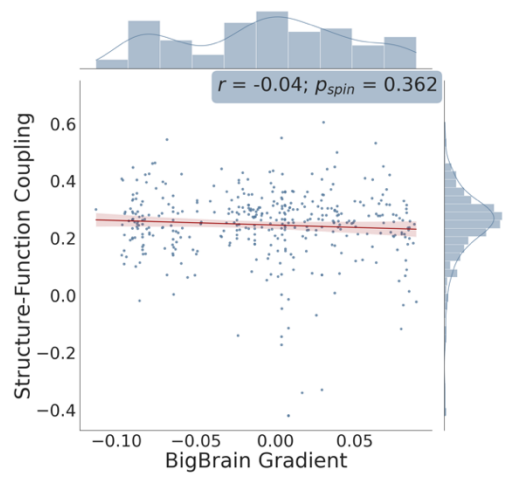

**Supplemental Figure 10 – Regional variations in structure-function coupling: atlas-based analysis.**

**A:** Mean differences in structure-function coupling across the 7 resting-state functional systems (generated using the 14 Penn subjects and Schaefer cortical atlas;  $n=400$  brain regions/datapoints). Data are presented as boxplots (median value at center line, lower quartile at left bound, upper quartile at right bound) with whiskers extending towards the minimum and maximum non-outlier values of the data; single datapoints denote outliers. The brain regions involved within each functional system are overlaid on the standardized *fsaverage* brain's surface and illustrated on the left side. DOR: Dorsal Attention, VIS: Visual, MOT: Somatomotor, VEN: Ventral Attention, FP: Fronto-Parietal, DMN: Default Mode Network, LIM: Limbic. **B:** Mean differences in structure-function coupling across the 5 cyto-architectonic classes (generated using the 14 Penn subjects and Schaefer cortical atlas;  $n=400$  brain regions/datapoints). Data are presented as boxplots (median value at center line, lower quartile at left bound, upper quartile at right bound) with whiskers extending towards the minimum and maximum non-outlier values of the data; single datapoints denote outliers. The brain regions involved within each class are overlaid on the standardized *fsaverage* brain's surface and illustrated on the left side. PAR: Parietal, AGR: Agranular, FRO: Frontal, GRA: Granular, POL: Polar. **C:** Scatterplot between the principal functional gradient scalar of each brain region and its corresponding structure-function coupling ( $n=400$  brain regions/datapoints). A linear regression was fit along with a 95% confidence interval (shown in red); the correlation coefficient (two-tailed Spearman's  $\rho$ :  $r$ ),  $p$ -value corresponding to the spatial permutation test ( $p_{spin}$ ), and histograms corresponding to each variable are reported. **D:** Scatterplot between the "BigBrain" gradient scalar of each brain region and its corresponding structure-function coupling ( $n=400$  brain regions/datapoints). A linear regression was fit along with a 95% confidence interval (shown in red); the correlation coefficient (two-tailed Spearman's  $\rho$ :  $r$ ),  $p$ -value corresponding to the spatial permutation test ( $p_{spin}$ ), and histograms corresponding to each variable are reported. Source data are provided as a Source Data file.

# Supplemental Figure 11

**A**

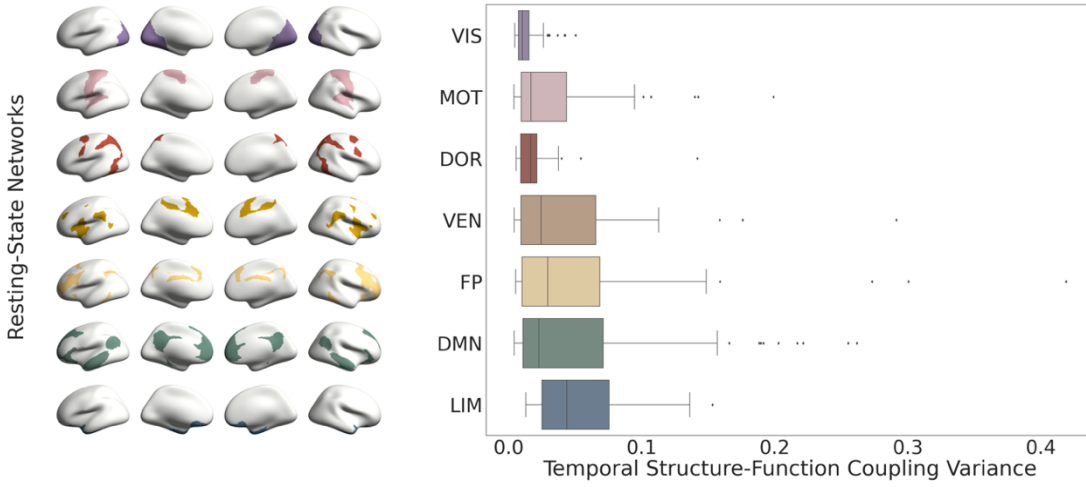

**B**

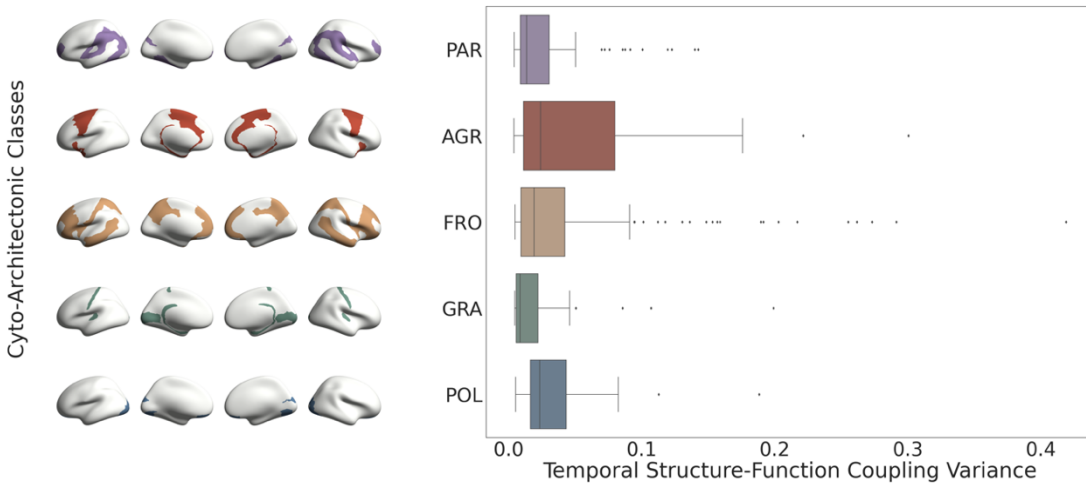

**C**

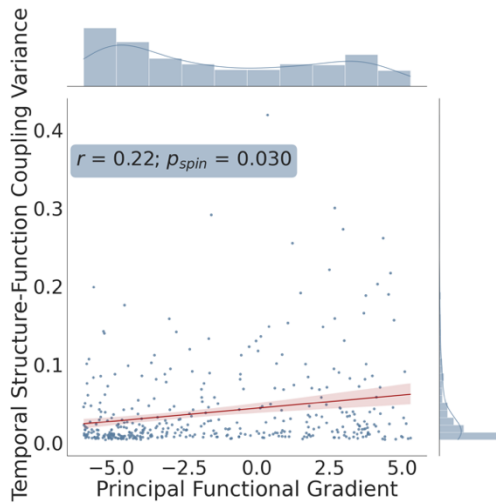

**D**

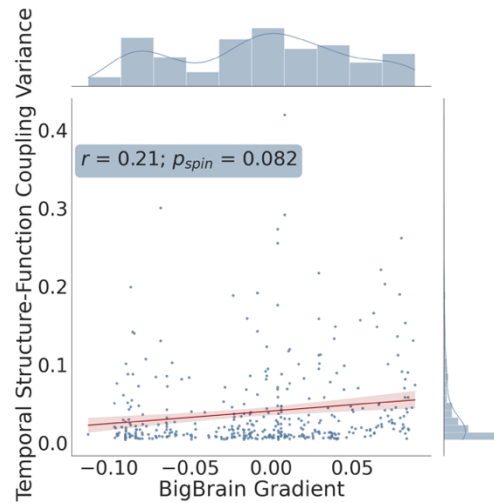

**Supplemental Figure 11 – Regional variations in temporal structure-function coupling variance: atlas-based analysis.**

**A:** Mean differences in temporal structure-function coupling variance across the 7 resting-state functional systems (generated using the 14 Penn subjects and Schaefer cortical atlas;  $n=400$  brain regions/datapoints). Data are presented as boxplots (median value at center line, lower quartile at left bound, upper quartile at right bound) with whiskers extending towards the minimum and maximum non-outlier values of the data; single datapoints denote outliers. The brain regions involved within each functional system are overlaid on the standardized *fsaverage* brain's surface and illustrated on the left side. DOR: Dorsal Attention, VIS: Visual, MOT: Somatomotor, VEN: Ventral Attention, FP: Fronto-Parietal, DMN: Default Mode Network, LIM: Limbic. **B:** Mean differences in temporal structure-function coupling variance across the 5 cyto-architectonic classes (generated using the 14 Penn subjects and Schaefer cortical atlas;  $n=400$  brain regions/datapoints). Data are presented as boxplots (median value at center line, lower quartile at left bound, upper quartile at right bound) with whiskers extending towards the minimum and maximum non-outlier values of the data; single datapoints denote outliers. The brain regions involved within each class are overlaid on the standardized *fsaverage* brain's surface and illustrated on the left side. PAR: Parietal, AGR: Agranular, FRO: Frontal, GRA: Granular, POL: Polar. **C:** Scatterplot between the principal functional gradient scalar of each brain region and its corresponding temporal structure-function coupling variance ( $n=400$  brain regions/datapoints). A linear regression was fit along with a 95% confidence interval (shown in red); the correlation coefficient (two-tailed Spearman's  $\rho: r$ ),  $p$ -value corresponding to the spatial permutation test ( $p_{spin}$ ), and histograms corresponding to each variable are reported. **D:** Scatterplot between the "BigBrain" gradient scalar of each brain region and its corresponding temporal structure-function coupling variance ( $n=400$  brain regions/datapoints). A linear regression was fit along with a 95% confidence interval (shown in red); the correlation coefficient (two-tailed Spearman's  $\rho: r$ ),  $p$ -value corresponding to the spatial permutation test ( $p_{spin}$ ), and histograms corresponding to each variable are reported. Source data are provided as a Source Data file.

# Supplemental Figure 12

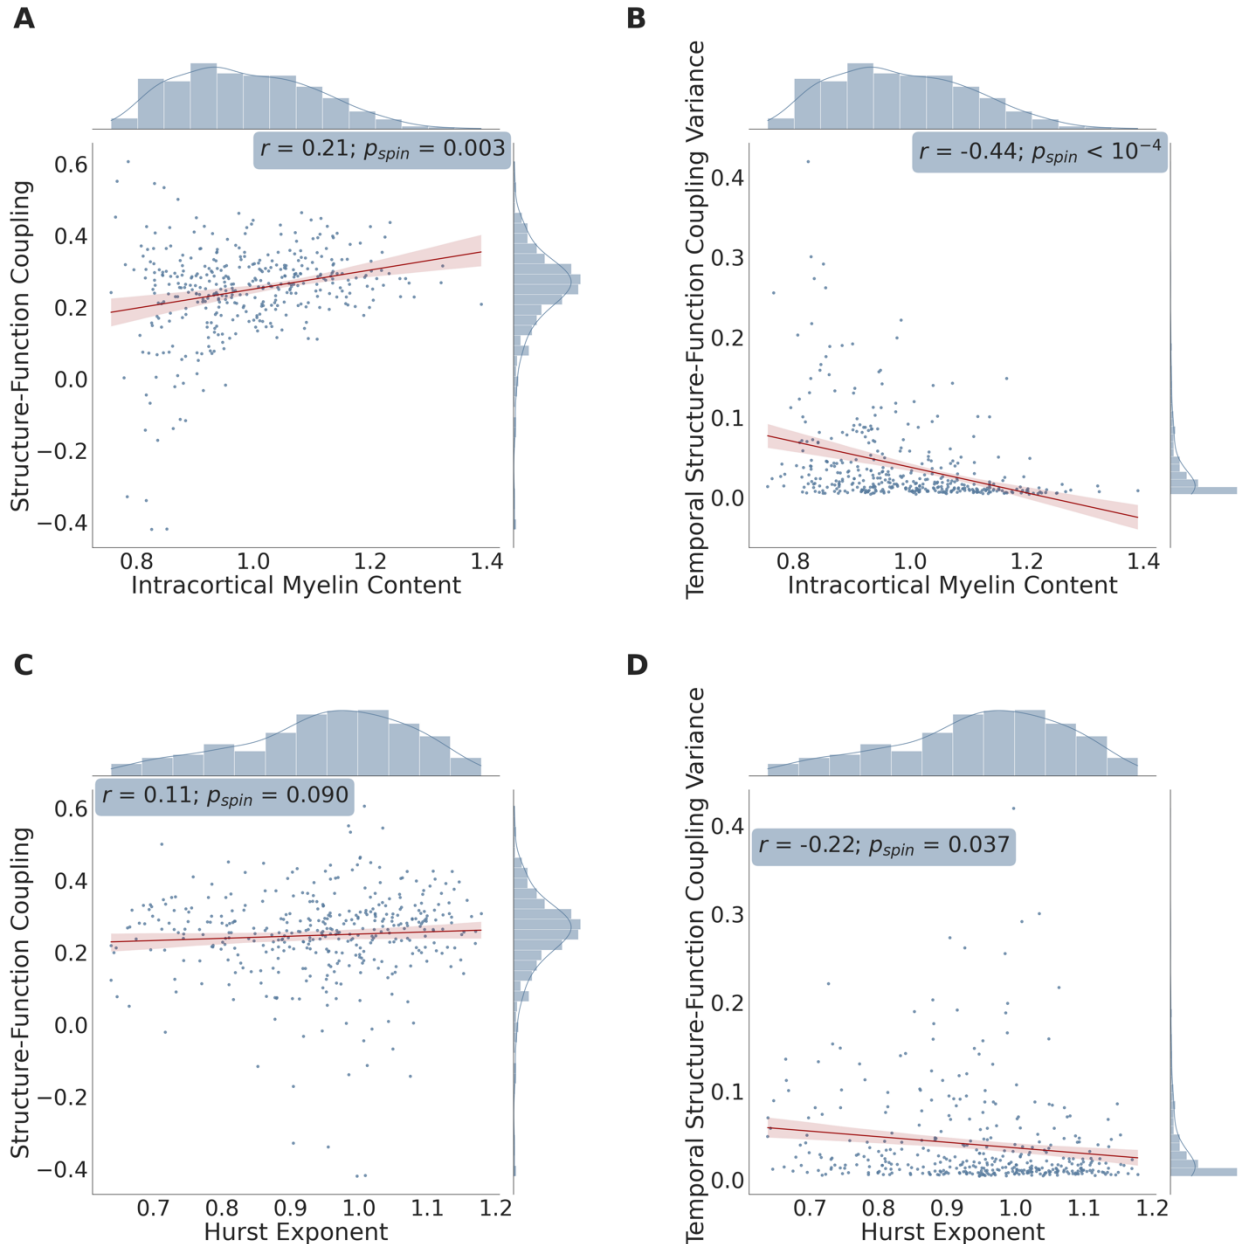



**Supplemental Figure 12 – Scatterplots between the variables of interest: atlas-based analysis.**

Scatterplot showing the association between each brain region's: mean structure-function coupling and intracortical myelin content as estimated by the T1-weighted/T2-weighted signal intensity ratio (**A**), mean temporal structure-function coupling variance and intracortical myelin content (**B**), mean structure-function coupling and the Hurst exponent of the functional signal time series (**C**), and mean temporal structure-function coupling variance and the Hurst exponent of the functional signal time series (**D**). For each scatterplot, a linear regression was fit along with a 95% confidence interval (shown in red); correlation coefficients (two-tailed Spearman's  $\rho: r$ ),  $p$ -values corresponding to the spatial permutation test ( $p_{spin}$ ), and histograms corresponding to each variable are displayed. Note:  $n=400$  brain regions in all panels. Source data are provided as a Source Data file.

# Supplemental Figure 13

**A**

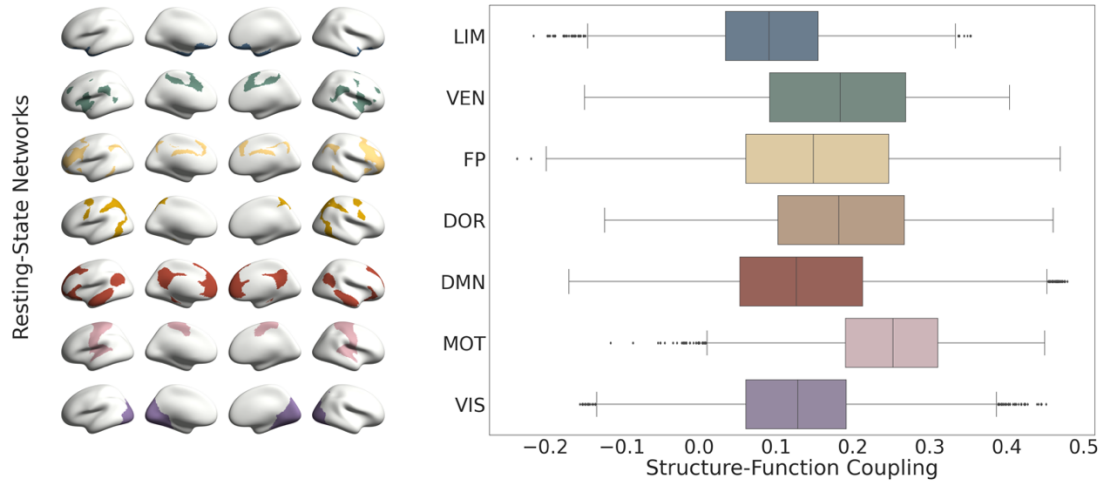

**B**

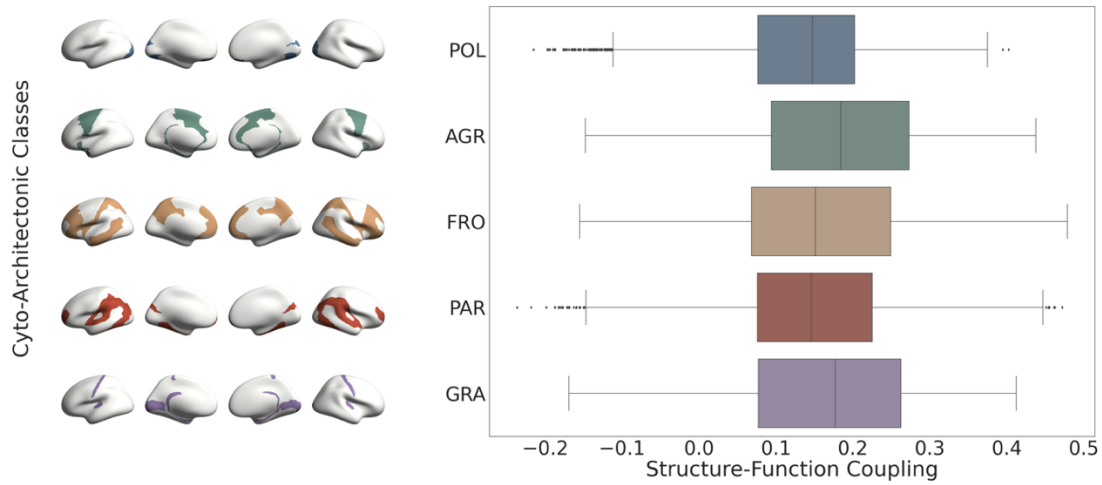

**C**

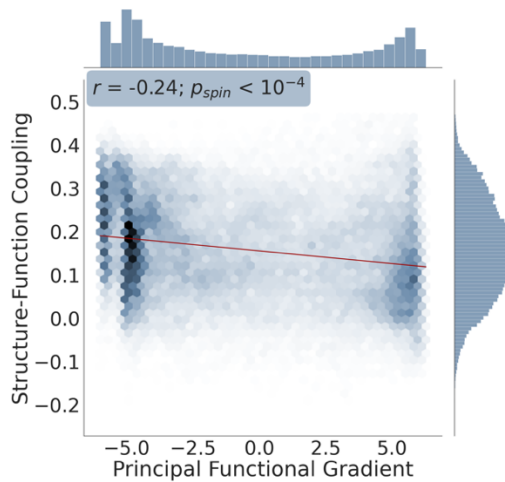

**Supplemental Figure 13 – Regional variations in structure-function coupling: voxel-based analysis – representative subject shown.**

**A:** Mean differences in structure-function coupling across the 7 resting-state functional networks (generated using one representative Penn subject analyzed with our voxel-based connectivity approach;  $n=71,561$  brain regions/datapoints). Data are presented as boxplots (median value at center line, lower quartile at left bound, upper quartile at right bound) with whiskers extending towards the minimum and maximum non-outlier values of the data; single datapoints denote outliers. The brain regions involved within each functional network are overlaid on the standardized *fsaverage* brain's surface and illustrated on the left side. LIM: Limbic, VEN: Ventral Attention, FP: Fronto-Parietal, DMN: Default Mode Network, DOR: Dorsal Attention, MOT: Somatomotor, VIS: Visual. **B:** Mean differences in structure-function coupling across the 5 cyto-architectonic classes (generated using one representative Penn subject analyzed with our voxel-based connectivity approach;  $n=71,561$  brain regions/datapoints). Data are presented as boxplots (median value at center line, lower quartile at left bound, upper quartile at right bound) with whiskers extending towards the minimum and maximum non-outlier values of the data; single datapoints denote outliers. The brain regions involved within each class are overlaid on the standardized *fsaverage* brain's surface and illustrated on the left side. POL: Polar, AGR: Agranular, FRO: Frontal, PAR: Parietal, GRA: Granular. **C:** High density plot between the principal functional gradient scalar of each brain region and its corresponding structure-function coupling ( $n=71,561$  brain regions/datapoints). A linear regression was fit along with a 95% confidence interval (shown in red); the correlation coefficient (two-tailed Spearman's  $\rho$ :  $r$ ),  $p$ -value corresponding to the spatial permutation test ( $p_{spin}$ ), and histograms corresponding to each variable are displayed. Source data are provided as a Source Data file.

# Supplemental Figure 14

**A**

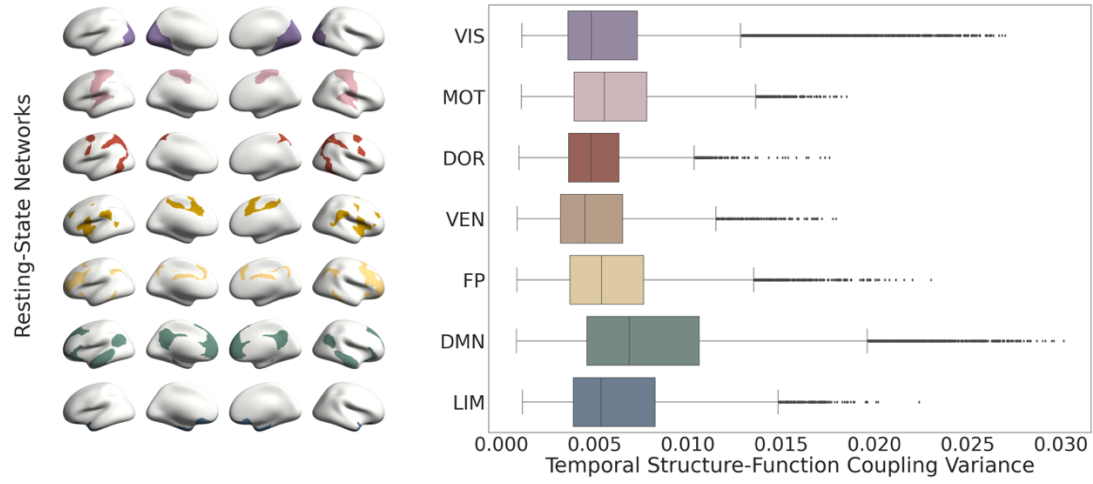

**B**

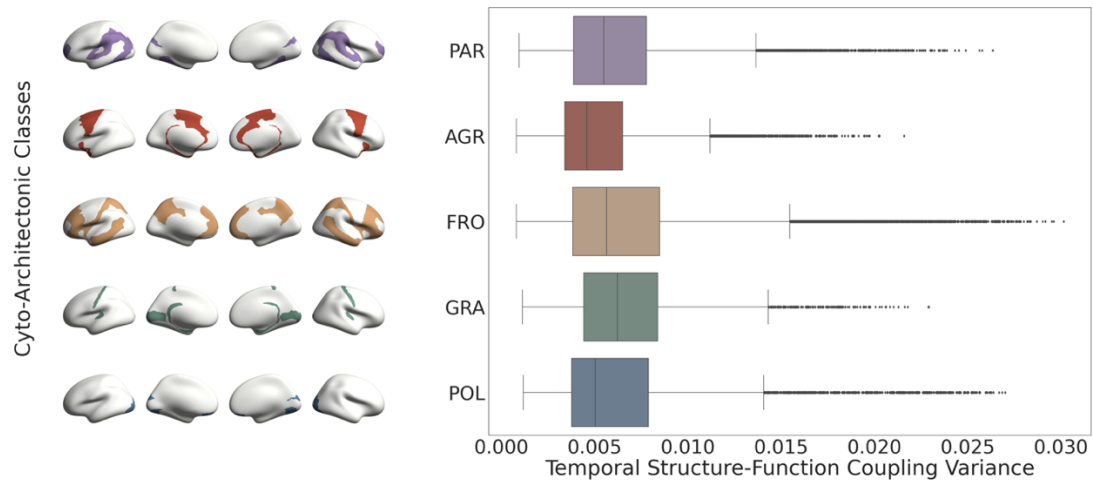

**C**

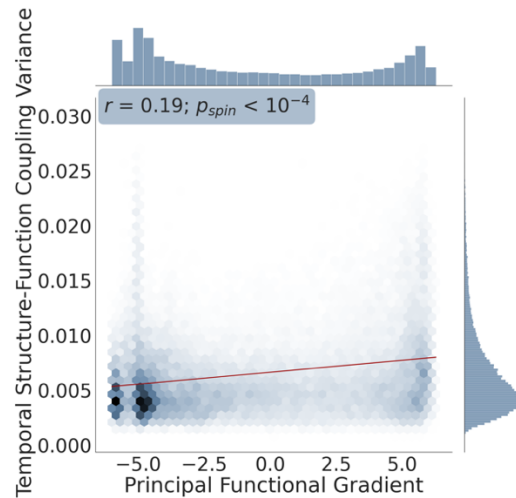

**Supplemental Figure 14 – Regional variations in temporal structure-function coupling variance: voxel-based analysis – representative subject shown.**

**A:** Mean differences in temporal structure-function coupling variance across the 7 resting-state functional networks (generated using one representative Penn subject analyzed with our voxel-based connectivity approach;  $n=71,561$  brain regions/datapoints). Data are presented as boxplots (median value at center line, lower quartile at left bound, upper quartile at right bound) with whiskers extending towards the minimum and maximum non-outlier values of the data; single datapoints denote outliers. The brain regions involved within each functional network are overlaid on the standardized *fsaverage* brain's surface and illustrated on the left side. DOR: Dorsal Attention, VIS: Visual, MOT: Somatomotor, VEN: Ventral Attention, FP: Fronto-Parietal, DMN: Default Mode Network, LIM: Limbic. **B:** Mean differences in temporal structure-function coupling variance across the 5 cyto-architectonic classes (generated using one representative Penn subject analyzed with our voxel-based connectivity approach;  $n=71,561$  brain regions/datapoints). Data are presented as boxplots (median value at center line, lower quartile at left bound, upper quartile at right bound) with whiskers extending towards the minimum and maximum non-outlier values of the data; single datapoints denote outliers. The brain regions involved within each class are overlaid on the standardized *fsaverage* brain's surface and illustrated on the left side. PAR: Parietal, AGR: Agranular, FRO: Frontal, GRA: Granular, POL: Polar. **C:** High density plot between the principal functional gradient scalar of each brain region and its corresponding temporal structure-function coupling variance ( $n=71,561$  brain regions/datapoints). A linear regression was fit along with a 95% confidence interval (shown in red); the correlation coefficient (two-tailed Spearman's  $\rho$ :  $r$ ),  $p$ -value corresponding to the spatial permutation test ( $p_{spin}$ ), and histograms corresponding to each variable are displayed. Source data are provided as a Source Data file.

# Supplemental Figure 15

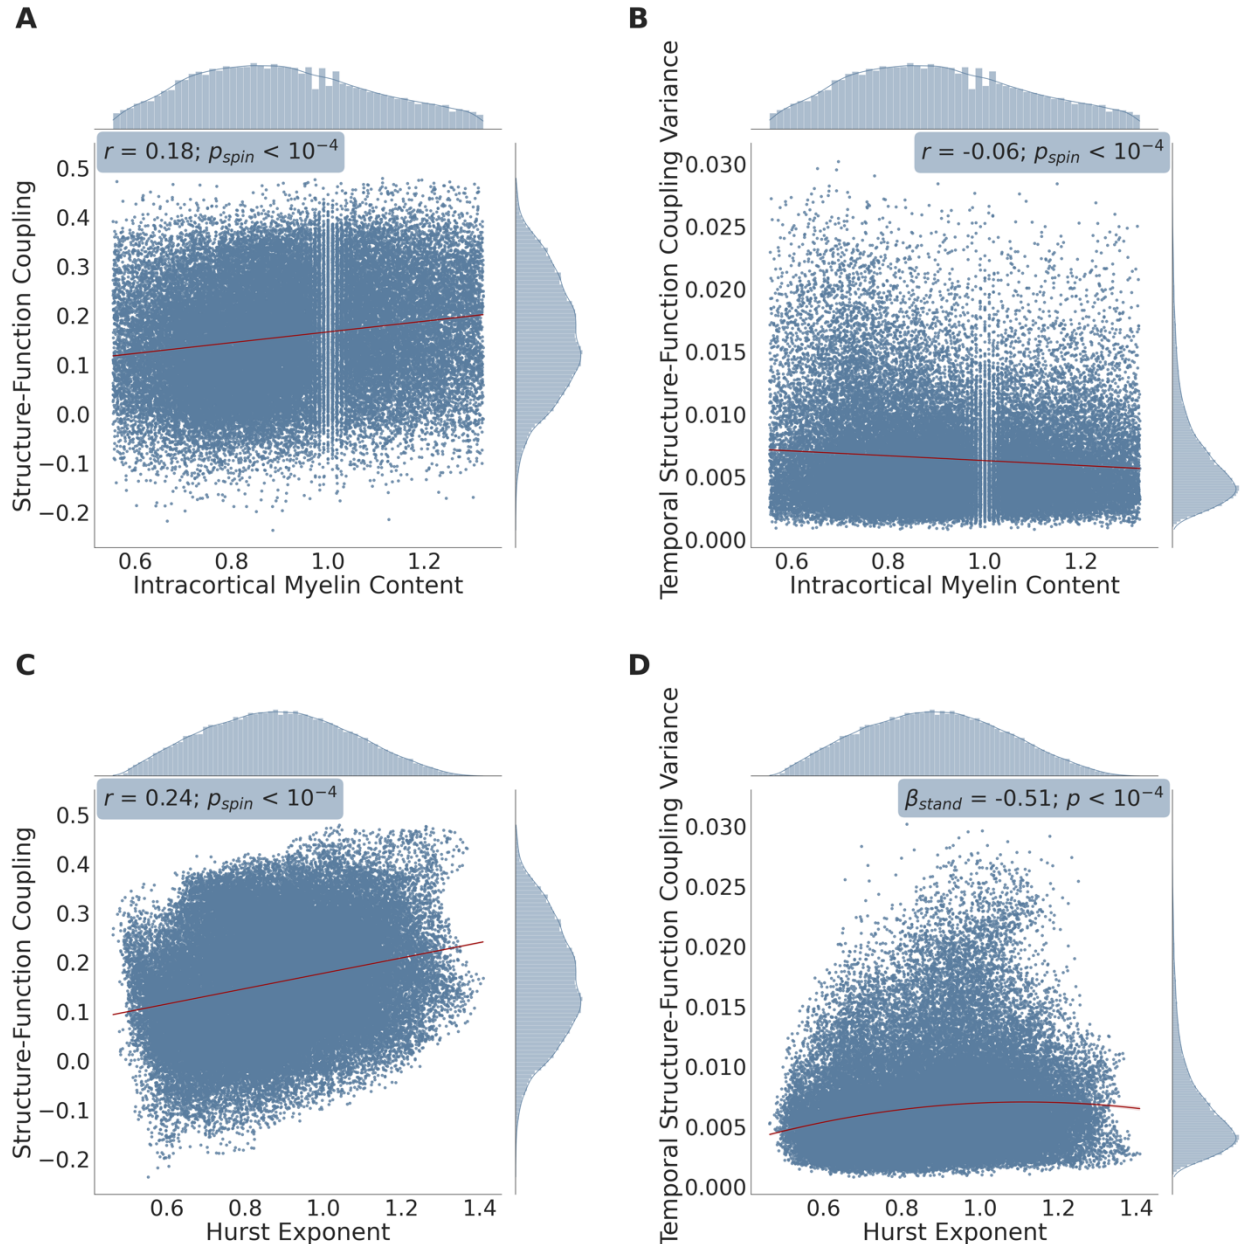

**Supplemental Figure 15 – Scatterplots between the variables of interest: voxel-based analysis – representative subject shown.**

Scatterplots showing the association between each cortical voxel's: mean structure-function coupling and intracortical myelin content estimated by the T1-weighted/T2-weighted signal intensity ratio (**A**), mean temporal structure-function coupling variance and intracortical myelin content (**B**), mean structure-function coupling and the Hurst exponent of the functional signal time series (**C**), and mean temporal structure-function coupling variance and the Hurst exponent of the functional signal time series (**D**). For plots (A), (B), and (C), a linear regression was fit along with a 95% confidence interval (shown in red); correlation coefficients (two-tailed Spearman's  $\rho: r$ ),  $p$ -values corresponding to the spatial permutation test ( $p_{spin}$ ), and histograms corresponding to each variable are displayed. In plot (D), a quadratic regression was fit along with a 95% confidence interval (shown in red); the standardized  $\beta$  coefficient and bootstrapped  $p$ -value corresponding to the quadratic regression mentioned in the voxel-based analysis component of our Results section: 'Biological Correlates of Structure-Function Coupling: Whole-brain perspective,' are also reported. Data shown in this figure were obtained from a representative subject that was analyzed using our voxel-based connectivity approach. Note:  $n=71,561$  voxels in all panels. Source data are provided as a Source Data file.

## SUPPLEMENTARY REFERENCES

1. Glasser, M. F. & Van Essen, D. C. Mapping Human Cortical Areas In Vivo Based on Myelin Content as Revealed by T1- and T2-Weighted MRI. *J. Neurosci.* **31**, 11597–11616 (2011).
2. Ganzetti, M., Wenderoth, N. & Mantini, D. Whole brain myelin mapping using T1- and T2-weighted MR imaging data. *Front. Hum. Neurosci.* **8**, 671 (2014).
3. Ganzetti, M., Wenderoth, N. & Mantini, D. Mapping pathological changes in brain structure by combining T1- and T2-weighted MR imaging data. *Neuroradiology* **57**, 917–928 (2015).
4. Nerland, S. *et al.* Multisite reproducibility and test-retest reliability of the T1w/T2w-ratio: A comparison of processing methods. *NeuroImage* **245**, 118709 (2021).
5. Glasser, M. F. *et al.* Empirical transmit field bias correction of T1w/T2w myelin maps. *NeuroImage* **258**, 119360 (2022).
6. Arshad, M., Stanley, J. A. & Raz, N. Test–retest reliability and concurrent validity of in vivo myelin content indices: Myelin water fraction and calibrated T1w/T2w image ratio. *Hum. Brain Mapp.* **38**, 1780–1790 (2016).
7. Shams, Z., Norris, D. G. & Marques, J. P. A comparison of in vivo MRI based cortical myelin mapping using T1w/T2w and R1 mapping at 3T. *PLOS ONE* **14**, e0218089 (2019).
8. Uddin, M. N., Figley, T. D., Marrie, R. A., Figley, C. R. & for the CCOMS Study Group. Can T1w/T2w ratio be used as a myelin-specific measure in subcortical structures? Comparisons between FSE-based T1w/ T2w ratios, GRASE-based T1w/T2w ratios and multi-echo GRASE-based myelin water fractions. *NMR Biomed.* **31**, e3868 (2018).
9. Hagiwara, A. *et al.* Myelin Measurement: Comparison Between Simultaneous Tissue Relaxometry, Magnetization Transfer Saturation Index, and T1w/T2w Ratio Methods. *Sci. Rep.* **8**, 10554 (2018).



10. Piredda, G. F., Hilbert, T., Thiran, J.-P. & Kober, T. Probing myelin content of the human brain with MRI: A review. *Magn. Reson. Med.* **85**, 627–652 (2021).
11. Trakoshis, S. *et al.* Intrinsic excitation-inhibition imbalance affects medial prefrontal cortex differently in autistic men versus women. *eLife* **9**, e55684 (2020).
12. Gao, R., Peterson, E. J. & Voytek, B. Inferring synaptic excitation/inhibition balance from field potentials. *NeuroImage* **158**, 70–78 (2017).
13. Larsen, B. *et al.* A developmental reduction of the excitation:inhibition ratio in association cortex during adolescence. *Sci. Adv.* **8**, eabj8750 (2022).
